# Supplementary material for: Mechanistic differences between the Ru(ii) and Zn(ii)-catalyzed cross-coupling of cyclopropenes with diazo compounds: a DFT study
Source: Royal Society of Chemistry journal article supplement (doi:10.1039/d4cy00995a), 2024-01-01
Supplement: d4cy00995a1.pdf [file d4cy00995a1.pdf]

*Supplementary Information*

**Mechanistic differences between the Ru(II) and Zn(II)-catalyzed cross-coupling of cyclopropenes with diazo compounds: A DFT study**

Tiantian Liu<sup>a</sup>, Kang Lv<sup>c</sup>, Xiaoguang Bao<sup>\*a,b</sup>

<sup>a</sup> *Innovation Center for Chemical Sciences, College of Chemistry, Chemical Engineering and Materials Science, Soochow University, 199 Ren-Ai Road, Suzhou Industrial Park, Suzhou, Jiangsu 215123, China.*

<sup>b</sup> *Jiangsu Key Laboratory of Advanced Negative Carbon Technologies, Soochow University, Suzhou, Jiangsu 215123, China.*

<sup>c</sup> *School of Chemistry, Chemical Engineering and Materials, Jining University, Qufu, Shandong 273155, China.*

E-mail: xgbao@suda.edu.cn

**Contents**

- 1. Figures S1-S3.....S2 ~ S3**
- 2. Cartesian Coordinates and Energies.....S3 ~ S63**

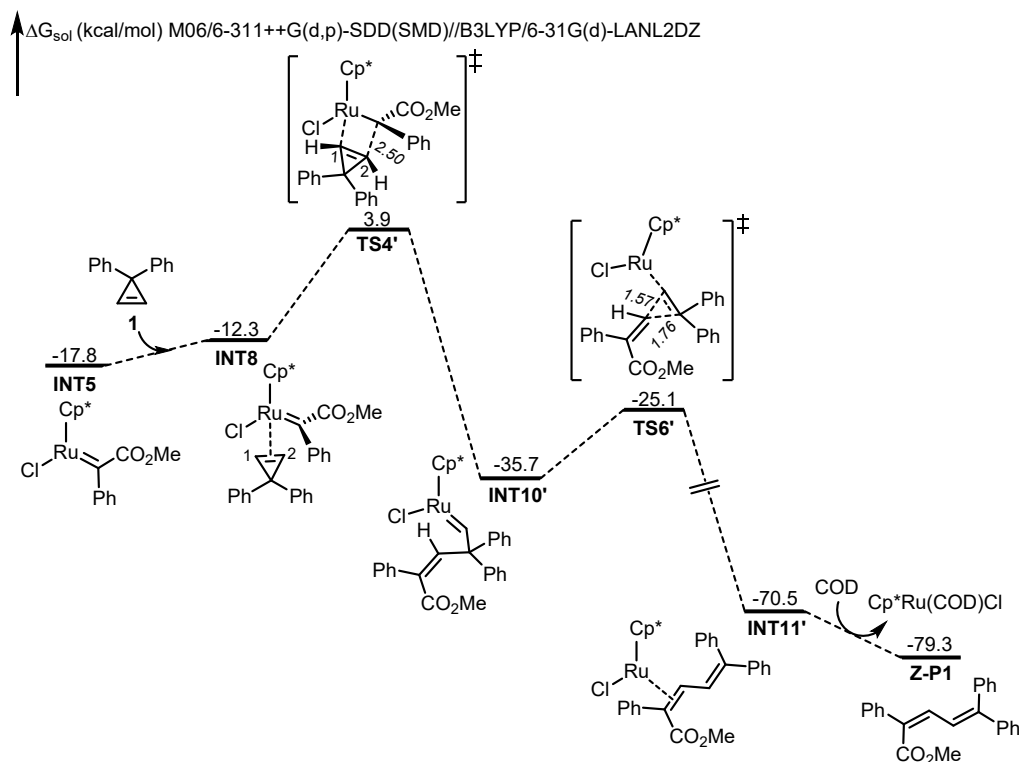

**Fig. S1** Energy profiles for the Ru(II)-catalyzed cross-coupling of cyclopropenes with diazo compounds to form the product of (Z)-1,3-butadiene derivatives.

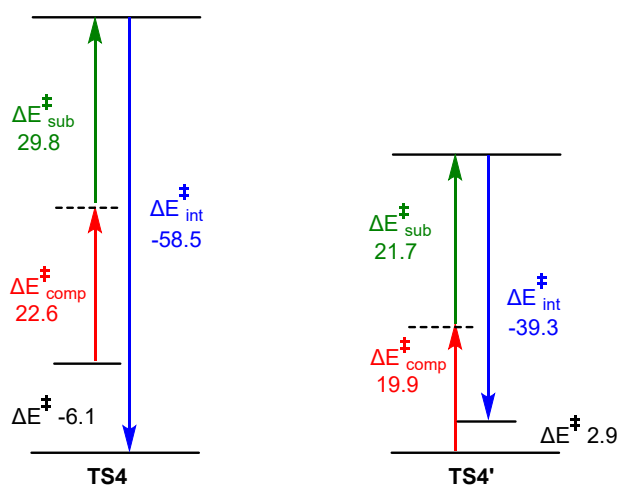

**Fig. S2** Distortion, interaction and activation energies for **TS4** and **TS4'** (green arrow: distortion energy of **1**; red arrow: distortion energy of **INT5**; blue arrow: interaction energy; black: activation energy, in kcal/mol).

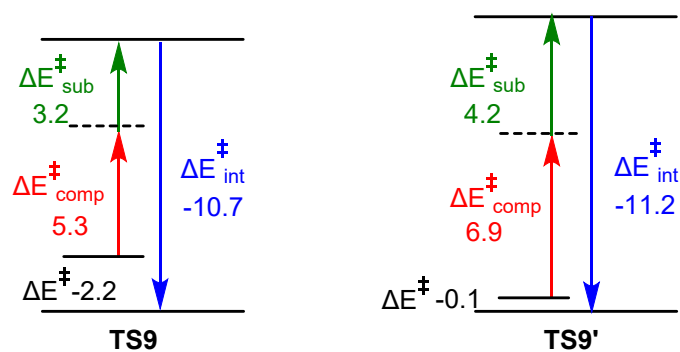

**Fig. S3** Distortion, interaction and activation energies for **TS9** and **TS9'** (green arrow: distortion energy of **4**; red arrow: distortion energy of **INT15**; blue arrow: interaction energy; black: activation energy, in kcal/mol).

### Cartesian Coordinates and Energies

#### Cp\*Ru(COD)Cl

| Center Number | Atomic Number | Atomic Type | Coordinates (Angstroms) |           |           |
|---------------|---------------|-------------|-------------------------|-----------|-----------|
|               |               |             | X                       | Y         | Z         |
| 1             | 6             | 0           | 1.671498                | 1.022080  | -1.037694 |
| 2             | 6             | 0           | 1.305771                | 1.608320  | 0.231838  |
| 3             | 6             | 0           | 1.643602                | 0.653816  | 1.271531  |
| 4             | 6             | 0           | 2.105429                | -0.525773 | 0.641990  |
| 5             | 6             | 0           | 2.105354                | -0.303913 | -0.803096 |
| 6             | 6             | 0           | 1.669212                | 1.729280  | -2.361611 |
| 7             | 1             | 0           | 1.474155                | 1.042062  | -3.190307 |
| 8             | 1             | 0           | 0.922321                | 2.527541  | -2.401267 |
| 9             | 1             | 0           | 2.648058                | 2.193258  | -2.545352 |
| 10            | 6             | 0           | 1.000441                | 3.061228  | 0.467260  |
| 11            | 1             | 0           | 0.539710                | 3.528310  | -0.407450 |
| 12            | 1             | 0           | 0.324512                | 3.206865  | 1.315334  |
| 13            | 1             | 0           | 1.921883                | 3.619504  | 0.686195  |
| 14            | 6             | 0           | 1.638582                | 0.922113  | 2.749630  |
| 15            | 1             | 0           | 0.923880                | 1.703364  | 3.023906  |
| 16            | 1             | 0           | 1.392528                | 0.024931  | 3.325319  |
| 17            | 1             | 0           | 2.629036                | 1.264292  | 3.080291  |
| 18            | 6             | 0           | 2.664027                | -1.741766 | 1.315988  |
| 19            | 1             | 0           | 3.760219                | -1.745429 | 1.234468  |
| 20            | 1             | 0           | 2.408754                | -1.766704 | 2.379010  |
| 21            | 1             | 0           | 2.278444                | -2.655219 | 0.855775  |
| 22            | 6             | 0           | 2.631180                | -1.282012 | -1.810468 |
| 23            | 1             | 0           | 2.199929                | -2.273723 | -1.643227 |
| 24            | 1             | 0           | 2.391231                | -0.976851 | -2.833254 |
| 25            | 1             | 0           | 3.724543                | -1.365126 | -1.735890 |
| 26            | 17            | 0           | -0.132578               | -2.693325 | -0.245547 |
| 27            | 6             | 0           | -2.592763               | 1.711980  | 0.633808  |
| 28            | 6             | 0           | -3.099177               | -1.030553 | -0.651041 |
| 29            | 6             | 0           | -2.227403               | 1.981116  | -0.838759 |
| 30            | 6             | 0           | -1.873885               | -0.518060 | -1.397370 |
| 31            | 6             | 0           | -1.493442               | 0.819867  | -1.484423 |
| 32            | 1             | 0           | -3.128285               | 2.228208  | -1.423676 |
| 33            | 1             | 0           | -3.908022               | -0.295564 | -0.744001 |
| 34            | 1             | 0           | -1.464532               | -1.194979 | -2.139306 |
| 35            | 1             | 0           | -2.663589               | 2.665539  | 1.170737  |
| 36            | 1             | 0           | -3.452188               | -1.934913 | -1.156259 |
| 37            | 1             | 0           | -1.583377               | 2.865417  | -0.893991 |
| 38            | 1             | 0           | -0.874758               | 1.091915  | -2.336114 |
| 39            | 6             | 0           | -2.846407               | -1.367873 | 0.842692  |

|    |    |   |           |           |           |
|----|----|---|-----------|-----------|-----------|
| 40 | 6  | 0 | -1.574452 | 0.816176  | 1.339475  |
| 41 | 1  | 0 | -0.983603 | 1.315415  | 2.101746  |
| 42 | 6  | 0 | -1.714059 | -0.576022 | 1.464564  |
| 43 | 1  | 0 | -1.228720 | -1.061929 | 2.308739  |
| 44 | 1  | 0 | -3.587083 | 1.257816  | 0.703359  |
| 45 | 44 | 0 | -0.093810 | -0.175449 | -0.008000 |
| 46 | 1  | 0 | -2.592746 | -2.425927 | 0.925455  |
| 47 | 1  | 0 | -3.771873 | -1.211836 | 1.420166  |

-----  
Zero-point correction= 0.409322 (Hartree/Particle)  
Thermal correction to Energy= 0.432134  
Thermal correction to Enthalpy= 0.433078  
Thermal correction to Gibbs Free Energy= 0.360079  
Sum of electronic and zero-point Energies= -1255.882309  
Sum of electronic and thermal Energies= -1255.859497  
Sum of electronic and thermal Enthalpies= -1255.858553  
Sum of electronic and thermal Free Energies= -1255.931552

M06/6-311++G(d,p)-SDD/SMD//B3LYP/6-31G(d)-LANL2DZ energy in tetrahydrofuran solvent = -1256.959927

1

-----

| Center<br>Number | Atomic<br>Number | Atomic<br>Type | Coordinates (Angstroms) |           |           |
|------------------|------------------|----------------|-------------------------|-----------|-----------|
|                  |                  |                | X                       | Y         | Z         |
| 1                | 6                | 0              | 0.001539                | 2.422401  | 0.647066  |
| 2                | 6                | 0              | -0.001200               | 2.422580  | -0.646565 |
| 3                | 6                | 0              | 0.000073                | 1.048222  | 0.000069  |
| 4                | 1                | 0              | -0.006417               | 2.955630  | 1.586902  |
| 5                | 1                | 0              | 0.006966                | 2.956068  | -1.586252 |
| 6                | 6                | 0              | 1.287042                | 0.248570  | -0.038668 |
| 7                | 6                | 0              | 1.397869                | -0.899252 | -0.839124 |
| 8                | 6                | 0              | 2.414289                | 0.660225  | 0.684079  |
| 9                | 6                | 0              | 2.596734                | -1.607931 | -0.914431 |
| 10               | 1                | 0              | 0.535753                | -1.239960 | -1.405679 |
| 11               | 6                | 0              | 3.613854                | -0.049319 | 0.616693  |
| 12               | 1                | 0              | 2.352847                | 1.552564  | 1.302422  |
| 13               | 6                | 0              | 3.710716                | -1.187535 | -0.184860 |
| 14               | 1                | 0              | 2.660223                | -2.490912 | -1.545495 |
| 15               | 1                | 0              | 4.472347                | 0.287552  | 1.192405  |
| 16               | 1                | 0              | 4.644158                | -1.741325 | -0.240905 |
| 17               | 6                | 0              | -1.287022               | 0.248777  | 0.038675  |
| 18               | 6                | 0              | -2.413616               | 0.659620  | -0.685507 |
| 19               | 6                | 0              | -1.398562               | -0.898062 | 0.840454  |
| 20               | 6                | 0              | -3.613305               | -0.049748 | -0.618209 |
| 21               | 1                | 0              | -2.351575               | 1.551186  | -1.304912 |
| 22               | 6                | 0              | -2.597528               | -1.606560 | 0.915664  |
| 23               | 1                | 0              | -0.536894               | -1.238116 | 1.408094  |
| 24               | 6                | 0              | -3.710893               | -1.186955 | 0.184671  |
| 25               | 1                | 0              | -4.471310               | 0.286472  | -1.195027 |
| 26               | 1                | 0              | -2.661620               | -2.488760 | 1.547757  |
| 27               | 1                | 0              | -4.644423               | -1.740604 | 0.240654  |

-----  
Zero-point correction= 0.218411 (Hartree/Particle)  
Thermal correction to Energy= 0.230369  
Thermal correction to Enthalpy= 0.231313  
Thermal correction to Gibbs Free Energy= 0.178827  
Sum of electronic and zero-point Energies= -578.507965  
Sum of electronic and thermal Energies= -578.496007  
Sum of electronic and thermal Enthalpies= -578.495063  
Sum of electronic and thermal Free Energies= -578.547549

M06/6-311++G(d,p)-SDD/SMD//B3LYP/6-31G(d)-LANL2DZ energy in tetrahydrofuran solvent = -578.427961

M06/6-311++G(d,p)-SDD/SMD//B3LYP/6-31G(d)-LANL2DZ energy in dichloromethane solvent = -578.432042

COD

-----

| Center<br>Number | Atomic<br>Number | Atomic<br>Type | Coordinates (Angstroms) |   |   |
|------------------|------------------|----------------|-------------------------|---|---|
|                  |                  |                | X                       | Y | Z |

|    |   |   |           |           |           |
|----|---|---|-----------|-----------|-----------|
| 1  | 6 | 0 | 1.086690  | -1.107027 | 0.664336  |
| 2  | 6 | 0 | -1.086658 | 1.107002  | 0.664437  |
| 3  | 6 | 0 | 1.922828  | -0.010982 | -0.030890 |
| 4  | 6 | 0 | -0.008153 | 1.707200  | -0.212451 |
| 5  | 6 | 0 | 1.214565  | 1.239268  | -0.491884 |
| 6  | 1 | 0 | 2.747882  | 0.279461  | 0.639710  |
| 7  | 1 | 0 | -0.674440 | 0.722283  | 1.600598  |
| 8  | 1 | 0 | -0.288845 | 2.641527  | -0.699873 |
| 9  | 1 | 0 | 1.777242  | -1.908143 | 0.956289  |
| 10 | 1 | 0 | -1.777177 | 1.908111  | 0.956471  |
| 11 | 1 | 0 | 2.415333  | -0.455085 | -0.908851 |
| 12 | 1 | 0 | 1.821948  | 1.849426  | -1.162827 |
| 13 | 6 | 0 | -1.922801 | 0.011048  | -0.030938 |
| 14 | 6 | 0 | 0.008140  | -1.707212 | -0.212496 |
| 15 | 1 | 0 | 0.288651  | -2.641696 | -0.699712 |
| 16 | 6 | 0 | -1.214585 | -1.239263 | -0.491832 |
| 17 | 1 | 0 | -1.822120 | -1.849541 | -1.162533 |
| 18 | 1 | 0 | 0.674486  | -0.722421 | 1.600554  |
| 19 | 1 | 0 | -2.415078 | 0.455215  | -0.908994 |
| 20 | 1 | 0 | -2.748033 | -0.279339 | 0.639475  |

Zero-point correction= 0.181130 (Hartree/Particle)  
 Thermal correction to Energy= 0.188552  
 Thermal correction to Enthalpy= 0.189496  
 Thermal correction to Gibbs Free Energy= 0.149638  
 Sum of electronic and zero-point Energies= -311.849277  
 Sum of electronic and thermal Energies= -311.841856  
 Sum of electronic and thermal Enthalpies= -311.840912  
 Sum of electronic and thermal Free Energies= -311.880770  
 M06/6-311++G(d,p)-SDD/SMD//B3LYP/6-31G(d)-LANL2DZ energy in tetrahydrofuran solvent =-311.861476

## INT1

| Center Number | Atomic Number | Atomic Type | Coordinates (Angstroms) |           |           |
|---------------|---------------|-------------|-------------------------|-----------|-----------|
|               |               |             | X                       | Y         | Z         |
| 1             | 6             | 0           | -2.369600               | -1.203710 | 1.383156  |
| 2             | 6             | 0           | -1.749331               | 0.029252  | 1.799492  |
| 3             | 6             | 0           | -2.210146               | 1.069255  | 0.918166  |
| 4             | 6             | 0           | -3.185040               | 0.499818  | 0.015394  |
| 5             | 6             | 0           | -3.275660               | -0.899465 | 0.288348  |
| 6             | 6             | 0           | -2.240735               | -2.535713 | 2.058774  |
| 7             | 1             | 0           | -2.347786               | -3.358017 | 1.345636  |
| 8             | 1             | 0           | -1.272372               | -2.645594 | 2.555094  |
| 9             | 1             | 0           | -3.019250               | -2.655299 | 2.825317  |
| 10            | 6             | 0           | -0.872988               | 0.230635  | 3.000001  |
| 11            | 1             | 0           | -0.350645               | -0.687235 | 3.282209  |
| 12            | 1             | 0           | -0.120047               | 1.002220  | 2.821036  |
| 13            | 1             | 0           | -1.479798               | 0.543849  | 3.860887  |
| 14            | 6             | 0           | -1.846616               | 2.518448  | 1.007906  |
| 15            | 1             | 0           | -0.835846               | 2.658712  | 1.396495  |
| 16            | 1             | 0           | -1.894649               | 3.003814  | 0.030391  |
| 17            | 1             | 0           | -2.546449               | 3.039711  | 1.677077  |
| 18            | 6             | 0           | -3.963809               | 1.245470  | -1.026063 |
| 19            | 1             | 0           | -4.962212               | 1.501844  | -0.646122 |
| 20            | 1             | 0           | -3.463032               | 2.175074  | -1.308450 |
| 21            | 1             | 0           | -4.078567               | 0.648660  | -1.934126 |
| 22            | 6             | 0           | -4.172366               | -1.876323 | -0.409019 |
| 23            | 1             | 0           | -4.274922               | -1.625965 | -1.467562 |
| 24            | 1             | 0           | -3.779770               | -2.894934 | -0.345967 |
| 25            | 1             | 0           | -5.171853               | -1.871550 | 0.047707  |
| 26            | 17            | 0           | -1.584953               | -0.654978 | -2.693826 |
| 27            | 44            | 0           | -1.196499               | -0.472505 | -0.300849 |
| 28            | 6             | 0           | 0.704495                | -1.126903 | 0.488942  |
| 29            | 6             | 0           | 0.791415                | -1.097340 | -0.888875 |
| 30            | 6             | 0           | 1.780210                | -0.239281 | -0.114966 |

|    |   |   |          |           |           |
|----|---|---|----------|-----------|-----------|
| 31 | 1 | 0 | 0.753415 | -1.874026 | 1.273828  |
| 32 | 1 | 0 | 0.922587 | -1.777042 | -1.720302 |
| 33 | 6 | 0 | 1.666727 | 1.267455  | -0.091539 |
| 34 | 6 | 0 | 1.237286 | 1.978948  | -1.219013 |
| 35 | 6 | 0 | 2.039604 | 1.988379  | 1.054401  |
| 36 | 6 | 0 | 1.174686 | 3.375450  | -1.200905 |
| 37 | 1 | 0 | 0.942915 | 1.430242  | -2.109197 |
| 38 | 6 | 0 | 1.976362 | 3.383092  | 1.076211  |
| 39 | 1 | 0 | 2.396850 | 1.448734  | 1.928660  |
| 40 | 6 | 0 | 1.543971 | 4.082245  | -0.054969 |
| 41 | 1 | 0 | 0.842450 | 3.909346  | -2.087657 |
| 42 | 1 | 0 | 2.270209 | 3.924033  | 1.972513  |
| 43 | 1 | 0 | 1.499480 | 5.168185  | -0.042269 |
| 44 | 6 | 0 | 3.194799 | -0.790629 | -0.079589 |
| 45 | 6 | 0 | 3.423164 | -2.169417 | 0.084249  |
| 46 | 6 | 0 | 4.317133 | 0.039272  | -0.243095 |
| 47 | 6 | 0 | 4.715760 | -2.692530 | 0.104599  |
| 48 | 1 | 0 | 2.582024 | -2.847739 | 0.187445  |
| 49 | 6 | 0 | 5.610489 | -0.484273 | -0.228705 |
| 50 | 1 | 0 | 4.180404 | 1.105230  | -0.386265 |
| 51 | 6 | 0 | 5.819234 | -1.852206 | -0.050009 |
| 52 | 1 | 0 | 4.858200 | -3.762175 | 0.236729  |
| 53 | 1 | 0 | 6.457683 | 0.184091  | -0.360410 |
| 54 | 1 | 0 | 6.826882 | -2.258875 | -0.037664 |

-----

Zero-point correction= 0.445890 (Hartree/Particle)  
Thermal correction to Energy= 0.474175  
Thermal correction to Enthalpy= 0.475119  
Thermal correction to Gibbs Free Energy= 0.386442  
Sum of electronic and zero-point Energies= -1522.533983  
Sum of electronic and thermal Energies= -1522.505698  
Sum of electronic and thermal Enthalpies= -1522.504754  
Sum of electronic and thermal Free Energies= -1522.593432  
M06/6-311++G(d,p)-SDD/SMD//B3LYP/6-31G(d)-LANL2DZ energy in tetrahydrofuran solvent =-1523.526172

## TS1

-----

| Center<br>Number | Atomic<br>Number | Atomic<br>Type | Coordinates (Angstroms) |           |           |
|------------------|------------------|----------------|-------------------------|-----------|-----------|
|                  |                  |                | X                       | Y         | Z         |
| 1                | 6                | 0              | -2.384356               | -0.925592 | 1.592811  |
| 2                | 6                | 0              | -1.645250               | 0.296967  | 1.756465  |
| 3                | 6                | 0              | -2.132776               | 1.237235  | 0.780324  |
| 4                | 6                | 0              | -3.240296               | 0.624153  | 0.079002  |
| 5                | 6                | 0              | -3.381369               | -0.715161 | 0.554800  |
| 6                | 6                | 0              | -2.262575               | -2.159105 | 2.437607  |
| 7                | 1                | 0              | -2.474499               | -3.062305 | 1.858622  |
| 8                | 1                | 0              | -1.259947               | -2.262254 | 2.861339  |
| 9                | 1                | 0              | -2.974241               | -2.123744 | 3.274409  |
| 10               | 6                | 0              | -0.623290               | 0.585743  | 2.816552  |
| 11               | 1                | 0              | -0.109704               | -0.322211 | 3.146960  |
| 12               | 1                | 0              | 0.135226                | 1.289493  | 2.463563  |
| 13               | 1                | 0              | -1.104414               | 1.026324  | 3.700563  |
| 14               | 6                | 0              | -1.695839               | 2.663266  | 0.643489  |
| 15               | 1                | 0              | -0.647163               | 2.793338  | 0.918489  |
| 16               | 1                | 0              | -1.815363               | 3.023320  | -0.381394 |
| 17               | 1                | 0              | -2.300934               | 3.308475  | 1.297096  |
| 18               | 6                | 0              | -4.076325               | 1.273339  | -0.983029 |
| 19               | 1                | 0              | -4.982392               | 1.712468  | -0.541905 |
| 20               | 1                | 0              | -3.530514               | 2.074343  | -1.488782 |
| 21               | 1                | 0              | -4.382193               | 0.551310  | -1.744095 |
| 22               | 6                | 0              | -4.413846               | -1.707123 | 0.109304  |
| 23               | 1                | 0              | -4.607105               | -1.617936 | -0.962844 |
| 24               | 1                | 0              | -4.088035               | -2.733502 | 0.299011  |
| 25               | 1                | 0              | -5.360429               | -1.550359 | 0.644915  |
| 26               | 17               | 0              | -1.851224               | -1.228218 | -2.542771 |
| 27               | 44               | 0              | -1.348221               | -0.530772 | -0.296083 |

|    |   |   |          |           |           |
|----|---|---|----------|-----------|-----------|
| 28 | 6 | 0 | 0.476824 | -1.227261 | 0.220453  |
| 29 | 6 | 0 | 0.912292 | -0.893794 | -1.034944 |
| 30 | 6 | 0 | 2.012618 | -0.130261 | -0.474211 |
| 31 | 1 | 0 | 0.885142 | -1.461521 | 1.192176  |
| 32 | 1 | 0 | 0.709932 | -1.319894 | -2.012269 |
| 33 | 6 | 0 | 1.919581 | 1.341817  | -0.335257 |
| 34 | 6 | 0 | 1.358532 | 2.102165  | -1.379051 |
| 35 | 6 | 0 | 2.402877 | 2.028663  | 0.796266  |
| 36 | 6 | 0 | 1.318864 | 3.494415  | -1.312573 |
| 37 | 1 | 0 | 0.965057 | 1.589133  | -2.251599 |
| 38 | 6 | 0 | 2.348549 | 3.421031  | 0.870135  |
| 39 | 1 | 0 | 2.824350 | 1.462013  | 1.621846  |
| 40 | 6 | 0 | 1.815982 | 4.160949  | -0.189475 |
| 41 | 1 | 0 | 0.900423 | 4.060162  | -2.140994 |
| 42 | 1 | 0 | 2.725845 | 3.928625  | 1.754264  |
| 43 | 1 | 0 | 1.784171 | 5.245933  | -0.137250 |
| 44 | 6 | 0 | 3.280342 | -0.841971 | -0.191292 |
| 45 | 6 | 0 | 3.342684 | -2.255618 | -0.187338 |
| 46 | 6 | 0 | 4.495386 | -0.146107 | 0.004462  |
| 47 | 6 | 0 | 4.540281 | -2.927715 | 0.039332  |
| 48 | 1 | 0 | 2.441091 | -2.831296 | -0.363400 |
| 49 | 6 | 0 | 5.693460 | -0.824750 | 0.217336  |
| 50 | 1 | 0 | 4.508226 | 0.936385  | -0.038702 |
| 51 | 6 | 0 | 5.726487 | -2.219752 | 0.247161  |
| 52 | 1 | 0 | 4.546900 | -4.014794 | 0.042851  |
| 53 | 1 | 0 | 6.608574 | -0.254431 | 0.355830  |
| 54 | 1 | 0 | 6.661523 | -2.746598 | 0.416080  |

-----  
Zero-point correction= 0.443048 (Hartree/Particle)  
Thermal correction to Energy= 0.471675  
Thermal correction to Enthalpy= 0.472619  
Thermal correction to Gibbs Free Energy= 0.382833  
Sum of electronic and zero-point Energies= -1522.501984  
Sum of electronic and thermal Energies= -1522.473357  
Sum of electronic and thermal Enthalpies= -1522.472412  
Sum of electronic and thermal Free Energies= -1522.562199  
M06/6-311++G(d,p)-SDD/SMD//B3LYP/6-31G(d)-LANL2DZ energy in tetrahydrofuran solvent =-1523.478142

## INT2

| Center<br>Number | Atomic<br>Number | Atomic<br>Type | Coordinates (Angstroms) |           |           |
|------------------|------------------|----------------|-------------------------|-----------|-----------|
|                  |                  |                | X                       | Y         | Z         |
| 1                | 6                | 0              | -2.871428               | 0.537308  | 1.583379  |
| 2                | 6                | 0              | -2.282676               | 1.588980  | 0.802069  |
| 3                | 6                | 0              | -2.870695               | 1.509062  | -0.519427 |
| 4                | 6                | 0              | -3.975780               | 0.556448  | -0.470827 |
| 5                | 6                | 0              | -3.947814               | -0.063044 | 0.783927  |
| 6                | 6                | 0              | -2.649197               | 0.273426  | 3.044663  |
| 7                | 1                | 0              | -2.757832               | -0.790024 | 3.280041  |
| 8                | 1                | 0              | -1.647048               | 0.580572  | 3.357631  |
| 9                | 1                | 0              | -3.375459               | 0.823578  | 3.660596  |
| 10               | 6                | 0              | -1.335317               | 2.646131  | 1.286295  |
| 11               | 1                | 0              | -0.673460               | 2.268684  | 2.071470  |
| 12               | 1                | 0              | -0.708054               | 3.029606  | 0.475852  |
| 13               | 1                | 0              | -1.892152               | 3.499076  | 1.699111  |
| 14               | 6                | 0              | -2.593938               | 2.429238  | -1.670636 |
| 15               | 1                | 0              | -1.567799               | 2.806399  | -1.645472 |
| 16               | 1                | 0              | -2.738599               | 1.917957  | -2.626296 |
| 17               | 1                | 0              | -3.271399               | 3.295502  | -1.644950 |
| 18               | 6                | 0              | -4.850665               | 0.223724  | -1.643513 |
| 19               | 1                | 0              | -5.345237               | 1.123917  | -2.029537 |
| 20               | 1                | 0              | -4.264035               | -0.218745 | -2.457554 |
| 21               | 1                | 0              | -5.629746               | -0.493224 | -1.371868 |
| 22               | 6                | 0              | -4.828364               | -1.172716 | 1.275856  |
| 23               | 1                | 0              | -5.386006               | -1.640474 | 0.461138  |
| 24               | 1                | 0              | -4.239532               | -1.955206 | 1.766529  |

|    |    |   |           |           |           |
|----|----|---|-----------|-----------|-----------|
| 25 | 1  | 0 | -5.552169 | -0.797996 | 2.012667  |
| 26 | 17 | 0 | -1.766561 | -1.757382 | -2.020229 |
| 27 | 44 | 0 | -1.771331 | -0.321410 | -0.104566 |
| 28 | 6  | 0 | 0.078010  | -0.433100 | 0.317288  |
| 29 | 6  | 0 | 1.179164  | 0.436224  | 0.070332  |
| 30 | 6  | 0 | 2.515889  | 0.092334  | 0.075680  |
| 31 | 1  | 0 | 0.337808  | -1.374961 | 0.827394  |
| 32 | 1  | 0 | 0.938028  | 1.459789  | -0.208634 |
| 33 | 6  | 0 | 3.545367  | 1.142033  | -0.107579 |
| 34 | 6  | 0 | 4.723247  | 0.884998  | -0.836197 |
| 35 | 6  | 0 | 3.368033  | 2.432197  | 0.430580  |
| 36 | 6  | 0 | 5.675374  | 1.883324  | -1.033539 |
| 37 | 1  | 0 | 4.877942  | -0.099899 | -1.265107 |
| 38 | 6  | 0 | 4.323527  | 3.427078  | 0.238619  |
| 39 | 1  | 0 | 2.484831  | 2.642031  | 1.026760  |
| 40 | 6  | 0 | 5.480541  | 3.158182  | -0.497511 |
| 41 | 1  | 0 | 6.570057  | 1.665669  | -1.610661 |
| 42 | 1  | 0 | 4.170438  | 4.411538  | 0.672822  |
| 43 | 1  | 0 | 6.226032  | 3.934452  | -0.647016 |
| 44 | 6  | 0 | 2.959307  | -1.314320 | 0.203385  |
| 45 | 6  | 0 | 2.311672  | -2.349952 | -0.499855 |
| 46 | 6  | 0 | 4.045611  | -1.648676 | 1.037665  |
| 47 | 6  | 0 | 2.724471  | -3.674953 | -0.353552 |
| 48 | 1  | 0 | 1.502921  | -2.110595 | -1.184507 |
| 49 | 6  | 0 | 4.446902  | -2.973078 | 1.188982  |
| 50 | 1  | 0 | 4.559199  | -0.862136 | 1.582681  |
| 51 | 6  | 0 | 3.787479  | -3.991594 | 0.493285  |
| 52 | 1  | 0 | 2.215945  | -4.456926 | -0.910465 |
| 53 | 1  | 0 | 5.275410  | -3.212583 | 1.850286  |
| 54 | 1  | 0 | 4.107691  | -5.023985 | 0.605646  |

-----  
Zero-point correction= 0.445969 (Hartree/Particle)  
Thermal correction to Energy= 0.474759  
Thermal correction to Enthalpy= 0.475703  
Thermal correction to Gibbs Free Energy= 0.383980  
Sum of electronic and zero-point Energies= -1522.563770  
Sum of electronic and thermal Energies= -1522.534981  
Sum of electronic and thermal Enthalpies= -1522.534036  
Sum of electronic and thermal Free Energies= -1522.625759  
M06/6-311++G(d,p)-SDD/SMD//B3LYP/6-31G(d)-LANL2DZ energy in tetrahydrofuran solvent =-1523.525989

2

| Center<br>Number | Atomic<br>Number | Atomic<br>Type | Coordinates (Angstroms) |           |           |
|------------------|------------------|----------------|-------------------------|-----------|-----------|
|                  |                  |                | X                       | Y         | Z         |
| 1                | 6                | 0              | -0.562636               | 0.679734  | -0.084066 |
| 2                | 7                | 0              | -0.705160               | 1.987532  | -0.187300 |
| 3                | 7                | 0              | -0.821506               | 3.114937  | -0.273660 |
| 4                | 6                | 0              | 0.817234                | 0.145413  | -0.033957 |
| 5                | 6                | 0              | 1.116468                | -1.158196 | -0.467123 |
| 6                | 6                | 0              | 1.870551                | 0.956430  | 0.426681  |
| 7                | 6                | 0              | 2.427152                | -1.630333 | -0.426871 |
| 8                | 1                | 0              | 0.322296                | -1.798272 | -0.829037 |
| 9                | 6                | 0              | 3.179513                | 0.481604  | 0.451394  |
| 10               | 1                | 0              | 1.665804                | 1.964611  | 0.777514  |
| 11               | 6                | 0              | 3.466030                | -0.816938 | 0.027761  |
| 12               | 1                | 0              | 2.635849                | -2.642298 | -0.763907 |
| 13               | 1                | 0              | 3.974899                | 1.127795  | 0.812851  |
| 14               | 1                | 0              | 4.486015                | -1.189946 | 0.051953  |
| 15               | 6                | 0              | -1.865488               | -0.001619 | 0.006510  |
| 16               | 8                | 0              | -1.736696               | -1.336133 | 0.179568  |
| 17               | 8                | 0              | -2.937176               | 0.573341  | -0.055246 |
| 18               | 6                | 0              | -2.978791               | -2.050462 | 0.298585  |
| 19               | 1                | 0              | -3.544909               | -1.692692 | 1.162203  |
| 20               | 1                | 0              | -3.584485               | -1.922082 | -0.602103 |
| 21               | 1                | 0              | -2.698025               | -3.095856 | 0.429188  |



-----  
 Zero-point correction= 0.158452 (Hartree/Particle)  
 Thermal correction to Energy= 0.170224  
 Thermal correction to Enthalpy= 0.171168  
 Thermal correction to Gibbs Free Energy= 0.119336  
 Sum of electronic and zero-point Energies= -607.520801  
 Sum of electronic and thermal Energies= -607.509028  
 Sum of electronic and thermal Enthalpies= -607.508084  
 Sum of electronic and thermal Free Energies= -607.559916  
 M06/6-311++G(d,p)-SDD/SMD//B3LYP/6-31G(d)-LANL2DZ energy in tetrahydrofuran solvent = -607.447819

**INT3**

-----

| Center<br>Number | Atomic<br>Number | Atomic<br>Type | Coordinates (Angstroms) |           |           |
|------------------|------------------|----------------|-------------------------|-----------|-----------|
|                  |                  |                | X                       | Y         | Z         |
| 1                | 6                | 0              | -1.941935               | -1.952373 | -0.000544 |
| 2                | 6                | 0              | -2.526670               | -1.338822 | 1.162007  |
| 3                | 6                | 0              | -3.543727               | -0.398306 | 0.713424  |
| 4                | 6                | 0              | -3.542790               | -0.397631 | -0.715172 |
| 5                | 6                | 0              | -2.525153               | -1.337721 | -1.163304 |
| 6                | 6                | 0              | -0.924664               | -3.056138 | -0.000397 |
| 7                | 1                | 0              | -0.281361               | -3.012939 | -0.884322 |
| 8                | 1                | 0              | -0.282547               | -3.013783 | 0.884431  |
| 9                | 1                | 0              | -1.419191               | -4.037170 | -0.001196 |
| 10               | 6                | 0              | -2.242342               | -1.695312 | 2.590271  |
| 11               | 1                | 0              | -1.222918               | -2.070604 | 2.716422  |
| 12               | 1                | 0              | -2.363477               | -0.830785 | 3.248791  |
| 13               | 1                | 0              | -2.932073               | -2.477973 | 2.936718  |
| 14               | 6                | 0              | -4.442238               | 0.409933  | 1.600856  |
| 15               | 1                | 0              | -3.969497               | 0.616670  | 2.564908  |
| 16               | 1                | 0              | -4.687278               | 1.371798  | 1.144230  |
| 17               | 1                | 0              | -5.379980               | -0.129370 | 1.794041  |
| 18               | 6                | 0              | -4.440144               | 0.411421  | -1.603039 |
| 19               | 1                | 0              | -3.966135               | 0.619038  | -2.566276 |
| 20               | 1                | 0              | -5.377631               | -0.127707 | -1.797935 |
| 21               | 1                | 0              | -4.685752               | 1.372884  | -1.145877 |
| 22               | 6                | 0              | -2.238963               | -1.692866 | -2.591531 |
| 23               | 1                | 0              | -2.358981               | -0.827651 | -3.249350 |
| 24               | 1                | 0              | -1.219470               | -2.068307 | -2.716669 |
| 25               | 1                | 0              | -2.928427               | -2.475002 | -2.939690 |
| 26               | 17               | 0              | -1.856938               | 2.617788  | -0.000281 |
| 27               | 44               | 0              | -1.575574               | 0.237578  | 0.000642  |
| 28               | 6                | 0              | 2.844576                | 0.610056  | 0.000793  |
| 29               | 7                | 0              | 1.541881                | 0.469693  | 0.001602  |
| 30               | 7                | 0              | 0.389427                | 0.386813  | 0.002447  |
| 31               | 6                | 0              | 3.695338                | -0.597475 | 0.000292  |
| 32               | 6                | 0              | 5.100535                | -0.511702 | -0.000407 |
| 33               | 6                | 0              | 3.103690                | -1.876337 | 0.000516  |
| 34               | 6                | 0              | 5.874796                | -1.671646 | -0.000869 |
| 35               | 1                | 0              | 5.572178                | 0.461514  | -0.000602 |
| 36               | 6                | 0              | 3.885908                | -3.027237 | 0.000052  |
| 37               | 1                | 0              | 2.021616                | -1.973201 | 0.001056  |
| 38               | 6                | 0              | 5.279648                | -2.933569 | -0.000648 |
| 39               | 1                | 0              | 6.957926                | -1.581429 | -0.001407 |
| 40               | 1                | 0              | 3.403145                | -4.001142 | 0.000232  |
| 41               | 1                | 0              | 5.890849                | -3.831746 | -0.001015 |
| 42               | 6                | 0              | 3.325408                | 2.013099  | 0.000316  |
| 43               | 8                | 0              | 2.289617                | 2.876073  | 0.000933  |
| 44               | 8                | 0              | 4.493346                | 2.356918  | -0.000531 |
| 45               | 6                | 0              | 2.631256                | 4.269872  | 0.000352  |
| 46               | 1                | 0              | 3.214159                | 4.521394  | 0.890595  |
| 47               | 1                | 0              | 3.212960                | 4.520933  | -0.890805 |
| 48               | 1                | 0              | 1.677037                | 4.795797  | 0.000849  |

-----

Zero-point correction= 0.384404 (Hartree/Particle)  
 Thermal correction to Energy= 0.413351

Thermal correction to Enthalpy= 0.414295  
 Thermal correction to Gibbs Free Energy= 0.320326  
 Sum of electronic and zero-point Energies= -1551.548321  
 Sum of electronic and thermal Energies= -1551.519374  
 Sum of electronic and thermal Enthalpies= -1551.518430  
 Sum of electronic and thermal Free Energies= -1551.612398  
 M06/6-311++G(d,p)-SDD/SMD//B3LYP/6-31G(d)-LANL2DZ energy in tetrahydrofuran solvent = -1552.531178

INT4

| Center<br>Number | Atomic<br>Number | Atomic<br>Type | Coordinates (Angstroms) |           |           |
|------------------|------------------|----------------|-------------------------|-----------|-----------|
|                  |                  |                | X                       | Y         | Z         |
| 1                | 6                | 0              | 1.051628                | 0.301886  | -1.890326 |
| 2                | 6                | 0              | 0.683428                | 1.612840  | -1.424407 |
| 3                | 6                | 0              | 1.608072                | 2.010684  | -0.386367 |
| 4                | 6                | 0              | 2.549213                | 0.925826  | -0.199058 |
| 5                | 6                | 0              | 2.188592                | -0.130320 | -1.118528 |
| 6                | 6                | 0              | 0.439937                | -0.426598 | -3.050260 |
| 7                | 1                | 0              | 0.587475                | -1.506826 | -2.965539 |
| 8                | 1                | 0              | -0.635569               | -0.244259 | -3.116961 |
| 9                | 1                | 0              | 0.900944                | -0.102581 | -3.994259 |
| 10               | 6                | 0              | -0.398519               | 2.474267  | -2.005187 |
| 11               | 1                | 0              | -1.222697               | 1.872836  | -2.396546 |
| 12               | 1                | 0              | -0.800941               | 3.167629  | -1.260278 |
| 13               | 1                | 0              | 0.000436                | 3.076366  | -2.833945 |
| 14               | 6                | 0              | 1.657941                | 3.340075  | 0.305375  |
| 15               | 1                | 0              | 0.686201                | 3.841432  | 0.278120  |
| 16               | 1                | 0              | 1.936407                | 3.224021  | 1.355865  |
| 17               | 1                | 0              | 2.390820                | 4.001675  | -0.177807 |
| 18               | 6                | 0              | 3.732866                | 0.945597  | 0.721662  |
| 19               | 1                | 0              | 4.043265                | -0.066163 | 0.997756  |
| 20               | 1                | 0              | 4.588867                | 1.439249  | 0.239548  |
| 21               | 1                | 0              | 3.501875                | 1.480691  | 1.645850  |
| 22               | 6                | 0              | 2.930722                | -1.419766 | -1.306910 |
| 23               | 1                | 0              | 3.490549                | -1.693923 | -0.408700 |
| 24               | 1                | 0              | 2.252012                | -2.245314 | -1.539819 |
| 25               | 1                | 0              | 3.649254                | -1.330723 | -2.134023 |
| 26               | 17               | 0              | 0.649487                | 0.823579  | 2.684381  |
| 27               | 44               | 0              | 0.566672                | 0.249588  | 0.295210  |
| 28               | 6                | 0              | -1.821882               | -0.447177 | 0.544773  |
| 29               | 7                | 0              | -2.176302               | -0.175674 | 1.814589  |
| 30               | 7                | 0              | -2.387423               | 0.078651  | 2.893042  |
| 31               | 6                | 0              | -1.020741               | -1.685288 | 0.321960  |
| 32               | 6                | 0              | -1.222635               | -2.498729 | -0.824493 |
| 33               | 6                | 0              | -0.105423               | -2.122317 | 1.313377  |
| 34               | 6                | 0              | -0.500007               | -3.668591 | -0.982827 |
| 35               | 1                | 0              | -1.937731               | -2.187303 | -1.574175 |
| 36               | 6                | 0              | 0.619146                | -3.312829 | 1.123306  |
| 37               | 1                | 0              | -0.012327               | -1.594267 | 2.255867  |
| 38               | 6                | 0              | 0.436755                | -4.080774 | -0.016118 |
| 39               | 1                | 0              | -0.670599               | -4.280204 | -1.865186 |
| 40               | 1                | 0              | 1.310945                | -3.630468 | 1.898457  |
| 41               | 1                | 0              | 0.991068                | -5.005072 | -0.152734 |
| 42               | 6                | 0              | -2.694890               | 0.199305  | -0.457140 |
| 43               | 8                | 0              | -3.506690               | 1.115297  | 0.117821  |
| 44               | 8                | 0              | -2.696918               | -0.041469 | -1.651204 |
| 45               | 6                | 0              | -4.398393               | 1.805532  | -0.772945 |
| 46               | 1                | 0              | -3.833776               | 2.405504  | -1.491093 |
| 47               | 1                | 0              | -5.028074               | 1.094349  | -1.313294 |
| 48               | 1                | 0              | -5.003183               | 2.447445  | -0.132495 |

Zero-point correction= 0.384412 (Hartree/Particle)  
 Thermal correction to Energy= 0.412994  
 Thermal correction to Enthalpy= 0.413939  
 Thermal correction to Gibbs Free Energy= 0.326177  
 Sum of electronic and zero-point Energies= -1551.528004

Sum of electronic and thermal Energies= -1551.499421  
 Sum of electronic and thermal Enthalpies= -1551.498477  
 Sum of electronic and thermal Free Energies= -1551.586239  
 M06/6-311++G(d,p)-SDD/SMD//B3LYP/6-31G(d)-LANL2DZ energy in tetrahydrofuran solvent = -1552.519619

TS2

| Center<br>Number | Atomic<br>Number | Atomic<br>Type | Coordinates (Angstroms) |           |           |
|------------------|------------------|----------------|-------------------------|-----------|-----------|
|                  |                  |                | X                       | Y         | Z         |
| 1                | 6                | 0              | 0.830355                | -0.743121 | -1.795279 |
| 2                | 6                | 0              | 1.782542                | 0.306030  | -1.574123 |
| 3                | 6                | 0              | 2.769777                | -0.173225 | -0.613424 |
| 4                | 6                | 0              | 2.409100                | -1.499951 | -0.230631 |
| 5                | 6                | 0              | 1.174488                | -1.833720 | -0.917771 |
| 6                | 6                | 0              | -0.259812               | -0.750829 | -2.825404 |
| 7                | 1                | 0              | -1.070197               | -1.430948 | -2.549554 |
| 8                | 1                | 0              | -0.693257               | 0.242439  | -2.957742 |
| 9                | 1                | 0              | 0.140167                | -1.085703 | -3.793024 |
| 10               | 6                | 0              | 1.868045                | 1.597517  | -2.332154 |
| 11               | 1                | 0              | 0.877670                | 1.962902  | -2.613396 |
| 12               | 1                | 0              | 2.364041                | 2.374280  | -1.741487 |
| 13               | 1                | 0              | 2.453919                | 1.461927  | -3.252744 |
| 14               | 6                | 0              | 3.981099                | 0.588213  | -0.163978 |
| 15               | 1                | 0              | 3.772102                | 1.659413  | -0.085875 |
| 16               | 1                | 0              | 4.326360                | 0.247917  | 0.815447  |
| 17               | 1                | 0              | 4.806653                | 0.460797  | -0.878572 |
| 18               | 6                | 0              | 3.160203                | -2.398993 | 0.706593  |
| 19               | 1                | 0              | 2.481578                | -3.047288 | 1.268143  |
| 20               | 1                | 0              | 3.857494                | -3.042513 | 0.151990  |
| 21               | 1                | 0              | 3.735755                | -1.824358 | 1.436419  |
| 22               | 6                | 0              | 0.468711                | -3.154328 | -0.843904 |
| 23               | 1                | 0              | 0.615947                | -3.631575 | 0.129066  |
| 24               | 1                | 0              | -0.606941               | -3.044179 | -1.003454 |
| 25               | 1                | 0              | 0.855915                | -3.839093 | -1.612152 |
| 26               | 17               | 0              | 1.177826                | 0.005645  | 2.685421  |
| 27               | 44               | 0              | 0.802255                | -0.096800 | 0.348932  |
| 28               | 6                | 0              | -1.172164               | 0.762231  | 0.414717  |
| 29               | 7                | 0              | -1.498768               | 1.292249  | 1.925971  |
| 30               | 7                | 0              | -1.231868               | 1.295999  | 3.017090  |
| 31               | 6                | 0              | -2.273132               | -0.237872 | 0.157737  |
| 32               | 6                | 0              | -3.235870               | -0.080062 | -0.852756 |
| 33               | 6                | 0              | -2.339132               | -1.383410 | 0.974793  |
| 34               | 6                | 0              | -4.215976               | -1.054698 | -1.053551 |
| 35               | 1                | 0              | -3.203177               | 0.790865  | -1.494977 |
| 36               | 6                | 0              | -3.331051               | -2.342115 | 0.783401  |
| 37               | 1                | 0              | -1.604660               | -1.515615 | 1.764873  |
| 38               | 6                | 0              | -4.271827               | -2.185541 | -0.238624 |
| 39               | 1                | 0              | -4.945424               | -0.919330 | -1.847876 |
| 40               | 1                | 0              | -3.365753               | -3.214566 | 1.430360  |
| 41               | 1                | 0              | -5.041704               | -2.936453 | -0.394317 |
| 42               | 6                | 0              | -1.145806               | 2.030686  | -0.386727 |
| 43               | 8                | 0              | -0.800283               | 3.107427  | 0.353807  |
| 44               | 8                | 0              | -1.351125               | 2.100176  | -1.587820 |
| 45               | 6                | 0              | -0.673018               | 4.344939  | -0.363280 |
| 46               | 1                | 0              | 0.149946                | 4.288325  | -1.080746 |
| 47               | 1                | 0              | -1.598277               | 4.579342  | -0.895629 |
| 48               | 1                | 0              | -0.463865               | 5.097596  | 0.396975  |

Zero-point correction= 0.382234 (Hartree/Particle)  
 Thermal correction to Energy= 0.410657  
 Thermal correction to Enthalpy= 0.411602  
 Thermal correction to Gibbs Free Energy= 0.323106  
 Sum of electronic and zero-point Energies= -1551.522213  
 Sum of electronic and thermal Energies= -1551.493789  
 Sum of electronic and thermal Enthalpies= -1551.492845  
 Sum of electronic and thermal Free Energies= -1551.581341

M06/6-311++G(d,p)-SDD/SMD//B3LYP/6-31G(d)-LANL2DZ energy in tetrahydrofuran solvent = -1552.509048

**INT5**

| Center Number | Atomic Number | Atomic Type | Coordinates (Angstroms) |           |           |
|---------------|---------------|-------------|-------------------------|-----------|-----------|
|               |               |             | X                       | Y         | Z         |
| 1             | 6             | 0           | -1.099953               | -0.230892 | 1.793855  |
| 2             | 6             | 0           | -1.962307               | 0.775062  | 1.242310  |
| 3             | 6             | 0           | -2.895648               | 0.115909  | 0.327083  |
| 4             | 6             | 0           | -2.542012               | -1.244749 | 0.244360  |
| 5             | 6             | 0           | -1.378004               | -1.461063 | 1.104579  |
| 6             | 6             | 0           | -0.114665               | -0.036480 | 2.909089  |
| 7             | 1             | 0           | 0.683632                | -0.783572 | 2.874177  |
| 8             | 1             | 0           | 0.348537                | 0.951380  | 2.860648  |
| 9             | 1             | 0           | -0.621702               | -0.138131 | 3.878622  |
| 10            | 6             | 0           | -2.049441               | 2.202544  | 1.691029  |
| 11            | 1             | 0           | -1.060146               | 2.604416  | 1.921605  |
| 12            | 1             | 0           | -2.501141               | 2.832896  | 0.919603  |
| 13            | 1             | 0           | -2.675112               | 2.282541  | 2.591779  |
| 14            | 6             | 0           | -4.001033               | 0.811382  | -0.409546 |
| 15            | 1             | 0           | -3.689724               | 1.803894  | -0.749098 |
| 16            | 1             | 0           | -4.311946               | 0.246822  | -1.291706 |
| 17            | 1             | 0           | -4.878610               | 0.940942  | 0.238893  |
| 18            | 6             | 0           | -3.195256               | -2.302000 | -0.595161 |
| 19            | 1             | 0           | -2.459299               | -3.009129 | -0.989190 |
| 20            | 1             | 0           | -3.924436               | -2.873302 | -0.004255 |
| 21            | 1             | 0           | -3.717383               | -1.867450 | -1.450878 |
| 22            | 6             | 0           | -0.750162               | -2.793246 | 1.385803  |
| 23            | 1             | 0           | -0.779383               | -3.441530 | 0.505512  |
| 24            | 1             | 0           | 0.294404                | -2.690693 | 1.691063  |
| 25            | 1             | 0           | -1.288578               | -3.308023 | 2.194554  |
| 26            | 17            | 0           | -1.010029               | -0.084884 | -2.758271 |
| 27            | 44            | 0           | -0.725990               | -0.008678 | -0.411705 |
| 28            | 6             | 0           | 1.125556                | 0.472333  | -0.197494 |
| 29            | 6             | 0           | 2.258724                | -0.447313 | -0.126611 |
| 30            | 6             | 0           | 3.424244                | -0.132712 | 0.611535  |
| 31            | 6             | 0           | 2.207954                | -1.694031 | -0.792811 |
| 32            | 6             | 0           | 4.480245                | -1.034585 | 0.697399  |
| 33            | 1             | 0           | 3.481714                | 0.815381  | 1.138847  |
| 34            | 6             | 0           | 3.272168                | -2.587023 | -0.715554 |
| 35            | 1             | 0           | 1.333532                | -1.924937 | -1.393217 |
| 36            | 6             | 0           | 4.408083                | -2.263184 | 0.033407  |
| 37            | 1             | 0           | 5.362530                | -0.780638 | 1.278655  |
| 38            | 1             | 0           | 3.222110                | -3.533990 | -1.245978 |
| 39            | 1             | 0           | 5.237978                | -2.962332 | 0.092943  |
| 40            | 6             | 0           | 1.420250                | 1.904211  | 0.098389  |
| 41            | 8             | 0           | 1.932698                | 2.526031  | -0.981225 |
| 42            | 8             | 0           | 1.228642                | 2.467929  | 1.166172  |
| 43            | 6             | 0           | 2.210973                | 3.927777  | -0.824493 |
| 44            | 1             | 0           | 1.295966                | 4.474363  | -0.581072 |
| 45            | 1             | 0           | 2.946273                | 4.089866  | -0.031462 |
| 46            | 1             | 0           | 2.605814                | 4.252774  | -1.787014 |

Zero-point correction= 0.374515 (Hartree/Particle)

Thermal correction to Energy= 0.401338

Thermal correction to Enthalpy= 0.402282

Thermal correction to Gibbs Free Energy= 0.315537

Sum of electronic and zero-point Energies= -1442.057136

Sum of electronic and thermal Energies= -1442.030313

Sum of electronic and thermal Enthalpies= -1442.029369

Sum of electronic and thermal Free Energies= -1442.116114

M06/6-311++G(d,p)-SDD/SMD//B3LYP/6-31G(d)-LANL2DZ energy in tetrahydrofuran solvent = -1443.064257

**N<sub>2</sub>**

| Center Number | Atomic Number | Atomic Type | Coordinates (Angstroms) |   |   |
|---------------|---------------|-------------|-------------------------|---|---|
|               |               |             | X                       | Y | Z |

|   |   |   |          |          |           |
|---|---|---|----------|----------|-----------|
| 1 | 7 | 0 | 0.000000 | 0.000000 | 0.552749  |
| 2 | 7 | 0 | 0.000000 | 0.000000 | -0.552749 |

Zero-point correction= 0.005598 (Hartree/Particle)  
 Thermal correction to Energy= 0.007959  
 Thermal correction to Enthalpy= 0.008903  
 Thermal correction to Gibbs Free Energy= -0.012851  
 Sum of electronic and zero-point Energies= -109.518530  
 Sum of electronic and thermal Energies= -109.516170  
 Sum of electronic and thermal Enthalpies= -109.515226  
 Sum of electronic and thermal Free Energies= -109.536980  
 M06/6-311++G(d,p)-SDD/SMD//B3LYP/6-31G(d)-LANL2DZ energy in tetrahydrofuran solvent = -109.484865

## INT6

| Center<br>Number | Atomic<br>Number | Atomic<br>Type | Coordinates (Angstroms) |           |           |
|------------------|------------------|----------------|-------------------------|-----------|-----------|
|                  |                  |                | X                       | Y         | Z         |
| 1                | 6                | 0              | 2.480490                | -0.951124 | -2.021111 |
| 2                | 6                | 0              | 2.816860                | -2.161986 | -1.323874 |
| 3                | 6                | 0              | 1.579038                | -2.905122 | -1.086408 |
| 4                | 6                | 0              | 0.502470                | -2.113052 | -1.530365 |
| 5                | 6                | 0              | 1.047479                | -0.862038 | -2.061079 |
| 6                | 6                | 0              | 3.454031                | 0.018434  | -2.624937 |
| 7                | 1                | 0              | 3.018222                | 1.016919  | -2.722035 |
| 8                | 1                | 0              | 4.356841                | 0.104589  | -2.016135 |
| 9                | 1                | 0              | 3.742094                | -0.317361 | -3.630724 |
| 10               | 6                | 0              | 4.201466                | -2.683963 | -1.085755 |
| 11               | 1                | 0              | 4.892416                | -1.873617 | -0.842376 |
| 12               | 1                | 0              | 4.216995                | -3.403148 | -0.261730 |
| 13               | 1                | 0              | 4.573848                | -3.199907 | -1.982587 |
| 14               | 6                | 0              | 1.506197                | -4.254770 | -0.437125 |
| 15               | 1                | 0              | 2.222011                | -4.339424 | 0.386189  |
| 16               | 1                | 0              | 0.512484                | -4.448547 | -0.026607 |
| 17               | 1                | 0              | 1.735741                | -5.048019 | -1.161924 |
| 18               | 6                | 0              | -0.958444               | -2.443523 | -1.462581 |
| 19               | 1                | 0              | -1.317553               | -2.813755 | -2.432782 |
| 20               | 1                | 0              | -1.163539               | -3.210406 | -0.712316 |
| 21               | 1                | 0              | -1.556867               | -1.566111 | -1.200799 |
| 22               | 6                | 0              | 0.244211                | 0.204953  | -2.742016 |
| 23               | 1                | 0              | -0.737660               | 0.331512  | -2.277285 |
| 24               | 1                | 0              | 0.752285                | 1.172173  | -2.713818 |
| 25               | 1                | 0              | 0.080333                | -0.057934 | -3.797190 |
| 26               | 17               | 0              | 0.396516                | -1.468907 | 2.008539  |
| 27               | 44               | 0              | 1.640051                | -0.913373 | 0.057271  |
| 28               | 6                | 0              | 2.586670                | 0.688646  | 0.560425  |
| 29               | 6                | 0              | 2.173684                | 2.070584  | 0.337478  |
| 30               | 6                | 0              | 3.118657                | 3.119981  | 0.237246  |
| 31               | 6                | 0              | 0.803893                | 2.395355  | 0.195689  |
| 32               | 6                | 0              | 2.711360                | 4.426811  | -0.010923 |
| 33               | 1                | 0              | 4.177569                | 2.896072  | 0.329059  |
| 34               | 6                | 0              | 0.398422                | 3.703819  | -0.045381 |
| 35               | 1                | 0              | 0.067454                | 1.604903  | 0.298975  |
| 36               | 6                | 0              | 1.351756                | 4.721969  | -0.152476 |
| 37               | 1                | 0              | 3.452276                | 5.217291  | -0.094487 |
| 38               | 1                | 0              | -0.659564               | 3.927600  | -0.146805 |
| 39               | 1                | 0              | 1.035603                | 5.744733  | -0.340375 |
| 40               | 6                | 0              | 3.975656                | 0.489851  | 1.069012  |
| 41               | 8                | 0              | 4.029326                | 0.639364  | 2.406563  |
| 42               | 8                | 0              | 4.952063                | 0.219171  | 0.385415  |
| 43               | 6                | 0              | 5.314496                | 0.417233  | 3.011798  |
| 44               | 1                | 0              | 5.653882                | -0.604834 | 2.823631  |
| 45               | 1                | 0              | 6.054624                | 1.118763  | 2.617007  |
| 46               | 1                | 0              | 5.162424                | 0.578919  | 4.078877  |
| 47               | 6                | 0              | -3.812542               | 1.049139  | 2.614298  |
| 48               | 6                | 0              | -2.706418               | 0.536090  | 2.182468  |

|    |   |   |           |           |           |
|----|---|---|-----------|-----------|-----------|
| 49 | 6 | 0 | -3.845014 | 0.582003  | 1.172649  |
| 50 | 1 | 0 | -4.398545 | 1.486078  | 3.410208  |
| 51 | 6 | 0 | -4.590093 | -0.698779 | 0.855486  |
| 52 | 6 | 0 | -4.037566 | -1.947379 | 1.172285  |
| 53 | 6 | 0 | -5.870290 | -0.664861 | 0.279772  |
| 54 | 6 | 0 | -4.740162 | -3.128009 | 0.920845  |
| 55 | 1 | 0 | -3.050236 | -1.993510 | 1.625830  |
| 56 | 6 | 0 | -6.576128 | -1.842150 | 0.030760  |
| 57 | 1 | 0 | -6.315446 | 0.293661  | 0.025074  |
| 58 | 6 | 0 | -6.012866 | -3.080395 | 0.349456  |
| 59 | 1 | 0 | -4.291386 | -4.085275 | 1.174545  |
| 60 | 1 | 0 | -7.569079 | -1.792185 | -0.409442 |
| 61 | 1 | 0 | -6.562319 | -3.998110 | 0.156153  |
| 62 | 6 | 0 | -3.768687 | 1.608257  | 0.059578  |
| 63 | 6 | 0 | -3.698719 | 2.979626  | 0.348816  |
| 64 | 6 | 0 | -3.726699 | 1.221595  | -1.290853 |
| 65 | 6 | 0 | -3.595718 | 3.930979  | -0.667813 |
| 66 | 1 | 0 | -3.724895 | 3.303779  | 1.385845  |
| 67 | 6 | 0 | -3.614043 | 2.169200  | -2.310270 |
| 68 | 1 | 0 | -3.798408 | 0.168178  | -1.545305 |
| 69 | 6 | 0 | -3.549368 | 3.530251  | -2.005220 |
| 70 | 1 | 0 | -3.561770 | 4.987887  | -0.413643 |
| 71 | 1 | 0 | -3.585047 | 1.841511  | -3.346661 |
| 72 | 1 | 0 | -3.471140 | 4.268848  | -2.798566 |
| 73 | 1 | 0 | -1.682236 | 0.214518  | 2.322031  |

-----  
Zero-point correction= 0.593675 (Hartree/Particle)

Thermal correction to Energy= 0.634754

Thermal correction to Enthalpy= 0.635698

Thermal correction to Gibbs Free Energy= 0.511342

Sum of electronic and zero-point Energies= -2020.559584

Sum of electronic and thermal Energies= -2020.518505

Sum of electronic and thermal Enthalpies= -2020.517561

Sum of electronic and thermal Free Energies= -2020.641917

M06/6-311++G(d,p)-SDD/SMD//B3LYP/6-31G(d)-LANL2DZ energy in tetrahydrofuran solvent = -2021.500318

### TS3

-----

| Center<br>Number | Atomic<br>Number | Atomic<br>Type | Coordinates (Angstroms) |           |           |
|------------------|------------------|----------------|-------------------------|-----------|-----------|
|                  |                  |                | X                       | Y         | Z         |
| 1                | 6                | 0              | 3.805381                | -0.428592 | -0.497687 |
| 2                | 6                | 0              | 3.957858                | 0.918981  | -0.017644 |
| 3                | 6                | 0              | 4.055035                | 0.864540  | 1.443354  |
| 4                | 6                | 0              | 3.890547                | -0.466173 | 1.848801  |
| 5                | 6                | 0              | 3.629445                | -1.276316 | 0.657794  |
| 6                | 6                | 0              | 3.958313                | -0.880615 | -1.918880 |
| 7                | 1                | 0              | 3.405352                | -1.800624 | -2.119383 |
| 8                | 1                | 0              | 3.606158                | -0.127245 | -2.628827 |
| 9                | 1                | 0              | 5.019163                | -1.073009 | -2.133088 |
| 10               | 6                | 0              | 4.262860                | 2.132534  | -0.849531 |
| 11               | 1                | 0              | 3.835386                | 2.049497  | -1.852891 |
| 12               | 1                | 0              | 3.862057                | 3.043621  | -0.393369 |
| 13               | 1                | 0              | 5.347927                | 2.272523  | -0.960208 |
| 14               | 6                | 0              | 4.288021                | 2.062175  | 2.317734  |
| 15               | 1                | 0              | 5.345122                | 2.361500  | 2.298422  |
| 16               | 1                | 0              | 3.702318                | 2.923049  | 1.978152  |
| 17               | 1                | 0              | 4.014240                | 1.864662  | 3.357228  |
| 18               | 6                | 0              | 3.896650                | -1.007785 | 3.246528  |
| 19               | 1                | 0              | 4.027127                | -0.214792 | 3.987426  |
| 20               | 1                | 0              | 2.956310                | -1.521484 | 3.471708  |
| 21               | 1                | 0              | 4.718101                | -1.725298 | 3.374580  |
| 22               | 6                | 0              | 3.519272                | -2.772717 | 0.664796  |
| 23               | 1                | 0              | 2.873046                | -3.113694 | 1.478936  |
| 24               | 1                | 0              | 3.103019                | -3.147659 | -0.274098 |
| 25               | 1                | 0              | 4.506948                | -3.237269 | 0.800659  |
| 26               | 17               | 0              | 0.529853                | -0.673324 | 2.346471  |

|    |    |   |           |           |           |
|----|----|---|-----------|-----------|-----------|
| 27 | 44 | 0 | 1.979544  | 0.162951  | 0.576406  |
| 28 | 6  | 0 | 0.728025  | 0.260586  | -0.938499 |
| 29 | 6  | 0 | 0.608473  | -0.517501 | -2.177649 |
| 30 | 6  | 0 | 0.392138  | 0.057524  | -3.449749 |
| 31 | 6  | 0 | 0.710445  | -1.924464 | -2.095973 |
| 32 | 6  | 0 | 0.316694  | -0.746363 | -4.588718 |
| 33 | 1  | 0 | 0.290896  | 1.132830  | -3.532882 |
| 34 | 6  | 0 | 0.615883  | -2.721969 | -3.231937 |
| 35 | 1  | 0 | 0.844120  | -2.370983 | -1.115251 |
| 36 | 6  | 0 | 0.427061  | -2.134458 | -4.487842 |
| 37 | 1  | 0 | 0.164337  | -0.282849 | -5.560202 |
| 38 | 1  | 0 | 0.686739  | -3.802886 | -3.140843 |
| 39 | 1  | 0 | 0.359075  | -2.755049 | -5.377521 |
| 40 | 6  | 0 | 0.309867  | 1.690078  | -0.883875 |
| 41 | 8  | 0 | 0.433448  | 2.060732  | 0.443486  |
| 42 | 8  | 0 | 0.003704  | 2.492738  | -1.744467 |
| 43 | 6  | 0 | 0.264416  | 3.449594  | 0.759389  |
| 44 | 1  | 0 | 0.956866  | 4.066988  | 0.179884  |
| 45 | 1  | 0 | -0.762666 | 3.755040  | 0.543509  |
| 46 | 1  | 0 | 0.466995  | 3.531998  | 1.826988  |
| 47 | 6  | 0 | -2.382199 | -0.348994 | -1.194269 |
| 48 | 6  | 0 | -1.499611 | -0.225418 | -0.240964 |
| 49 | 6  | 0 | -3.459789 | -0.204737 | -0.225807 |
| 50 | 6  | 0 | -4.142110 | 1.100325  | -0.124484 |
| 51 | 6  | 0 | -3.528972 | 2.278881  | -0.607273 |
| 52 | 6  | 0 | -5.463906 | 1.207209  | 0.363629  |
| 53 | 6  | 0 | -4.196026 | 3.501078  | -0.577378 |
| 54 | 1  | 0 | -2.521847 | 2.238625  | -1.007059 |
| 55 | 6  | 0 | -6.126465 | 2.431987  | 0.387334  |
| 56 | 1  | 0 | -5.983428 | 0.317625  | 0.701182  |
| 57 | 6  | 0 | -5.496683 | 3.589369  | -0.075639 |
| 58 | 1  | 0 | -3.694976 | 4.389444  | -0.953584 |
| 59 | 1  | 0 | -7.144965 | 2.479129  | 0.764230  |
| 60 | 1  | 0 | -6.014670 | 4.544247  | -0.052762 |
| 61 | 6  | 0 | -3.914481 | -1.393542 | 0.527699  |
| 62 | 6  | 0 | -3.888539 | -2.664756 | -0.079700 |
| 63 | 6  | 0 | -4.352928 | -1.309132 | 1.864847  |
| 64 | 6  | 0 | -4.301243 | -3.800560 | 0.612385  |
| 65 | 1  | 0 | -3.543117 | -2.753074 | -1.105832 |
| 66 | 6  | 0 | -4.762249 | -2.446547 | 2.556914  |
| 67 | 1  | 0 | -4.345861 | -0.347294 | 2.368131  |
| 68 | 6  | 0 | -4.743250 | -3.696986 | 1.933679  |
| 69 | 1  | 0 | -4.279511 | -4.768822 | 0.119116  |
| 70 | 1  | 0 | -5.084042 | -2.358304 | 3.591184  |
| 71 | 1  | 0 | -5.061730 | -4.583337 | 2.475585  |
| 72 | 1  | 0 | -1.211872 | -0.323674 | 0.797713  |
| 73 | 1  | 0 | -2.314866 | -0.277961 | -2.279160 |

-----  
Zero-point correction= 0.592402 (Hartree/Particle)

Thermal correction to Energy= 0.632582

Thermal correction to Enthalpy= 0.633526

Thermal correction to Gibbs Free Energy= 0.516268

Sum of electronic and zero-point Energies= -2020.519746

Sum of electronic and thermal Energies= -2020.479566

Sum of electronic and thermal Enthalpies= -2020.478622

Sum of electronic and thermal Free Energies= -2020.595880

M06/6-311++G(d,p)-SDD/SMD//B3LYP/6-31G(d)-LANL2DZ energy in tetrahydrofuran solvent = -2021.449675

### TS3'

| Center<br>Number | Atomic<br>Number | Atomic<br>Type | Coordinates (Angstroms) |           |           |
|------------------|------------------|----------------|-------------------------|-----------|-----------|
|                  |                  |                | X                       | Y         | Z         |
| 1                | 6                | 0              | -3.489509               | -0.925556 | 0.016933  |
| 2                | 6                | 0              | -3.466325               | -0.060204 | 1.165062  |
| 3                | 6                | 0              | -3.657165               | 1.290084  | 0.694006  |
| 4                | 6                | 0              | -3.937127               | 1.233845  | -0.734612 |

|    |    |   |           |           |           |
|----|----|---|-----------|-----------|-----------|
| 5  | 6  | 0 | -3.792916 | -0.109965 | -1.149805 |
| 6  | 6  | 0 | -3.433140 | -2.425270 | 0.034274  |
| 7  | 1  | 0 | -3.064537 | -2.820798 | -0.916459 |
| 8  | 1  | 0 | -2.770023 | -2.792913 | 0.821832  |
| 9  | 1  | 0 | -4.433957 | -2.847411 | 0.204505  |
| 10 | 6  | 0 | -3.422295 | -0.488020 | 2.601207  |
| 11 | 1  | 0 | -2.927885 | -1.455833 | 2.715219  |
| 12 | 1  | 0 | -2.895591 | 0.241905  | 3.221853  |
| 13 | 1  | 0 | -4.443409 | -0.588210 | 2.995328  |
| 14 | 6  | 0 | -3.782434 | 2.518124  | 1.545560  |
| 15 | 1  | 0 | -3.279389 | 2.387173  | 2.507631  |
| 16 | 1  | 0 | -3.332644 | 3.383599  | 1.051589  |
| 17 | 1  | 0 | -4.839190 | 2.746318  | 1.745267  |
| 18 | 6  | 0 | -4.291278 | 2.418544  | -1.583323 |
| 19 | 1  | 0 | -5.333664 | 2.718655  | -1.406337 |
| 20 | 1  | 0 | -3.648224 | 3.273299  | -1.355829 |
| 21 | 1  | 0 | -4.185241 | 2.199170  | -2.649215 |
| 22 | 6  | 0 | -3.952221 | -0.649193 | -2.541018 |
| 23 | 1  | 0 | -3.922946 | 0.148173  | -3.287936 |
| 24 | 1  | 0 | -3.159056 | -1.363360 | -2.785073 |
| 25 | 1  | 0 | -4.913070 | -1.171922 | -2.644468 |
| 26 | 17 | 0 | -0.907773 | 2.769971  | -0.607488 |
| 27 | 44 | 0 | -1.796685 | 0.519993  | -0.183049 |
| 28 | 6  | 0 | -0.167082 | -0.363085 | 0.631483  |
| 29 | 6  | 0 | 0.037072  | -1.017709 | -0.672001 |
| 30 | 6  | 0 | -0.048870 | -2.422582 | -0.909780 |
| 31 | 6  | 0 | 0.117288  | -0.156670 | -1.804911 |
| 32 | 6  | 0 | -0.112009 | -2.911764 | -2.199493 |
| 33 | 1  | 0 | -0.072299 | -3.092450 | -0.061556 |
| 34 | 6  | 0 | 0.028771  | -0.680014 | -3.110331 |
| 35 | 1  | 0 | 0.375610  | 0.886938  | -1.679486 |
| 36 | 6  | 0 | -0.098318 | -2.043273 | -3.312358 |
| 37 | 1  | 0 | -0.168558 | -3.985982 | -2.358508 |
| 38 | 1  | 0 | 0.095270  | 0.000345  | -3.955074 |
| 39 | 1  | 0 | -0.150276 | -2.449309 | -4.319196 |
| 40 | 6  | 0 | -0.268770 | -1.144977 | 1.897069  |
| 41 | 8  | 0 | -0.134543 | -0.380211 | 3.008943  |
| 42 | 8  | 0 | -0.543931 | -2.334170 | 1.980396  |
| 43 | 6  | 0 | -0.203420 | -1.086338 | 4.254861  |
| 44 | 1  | 0 | -1.186810 | -1.540885 | 4.397199  |
| 45 | 1  | 0 | 0.556558  | -1.872154 | 4.297761  |
| 46 | 1  | 0 | -0.019326 | -0.334656 | 5.023759  |
| 47 | 6  | 0 | 2.187502  | 0.694902  | 1.908151  |
| 48 | 6  | 0 | 1.396732  | 0.909528  | 0.849079  |
| 49 | 6  | 0 | 2.856258  | 0.400098  | 0.619423  |
| 50 | 1  | 0 | 2.360377  | 0.912861  | 2.953220  |
| 51 | 6  | 0 | 3.910129  | 1.411498  | 0.198985  |
| 52 | 6  | 0 | 3.557720  | 2.697435  | -0.237168 |
| 53 | 6  | 0 | 5.274620  | 1.087311  | 0.287660  |
| 54 | 6  | 0 | 4.539105  | 3.626089  | -0.589621 |
| 55 | 1  | 0 | 2.511500  | 2.977670  | -0.313937 |
| 56 | 6  | 0 | 6.254666  | 2.017935  | -0.053909 |
| 57 | 1  | 0 | 5.566375  | 0.095748  | 0.621644  |
| 58 | 6  | 0 | 5.890779  | 3.292187  | -0.496974 |
| 59 | 1  | 0 | 4.242304  | 4.612434  | -0.936451 |
| 60 | 1  | 0 | 7.304501  | 1.746899  | 0.024799  |
| 61 | 1  | 0 | 6.654293  | 4.017077  | -0.766680 |
| 62 | 6  | 0 | 3.132579  | -1.025049 | 0.195533  |
| 63 | 6  | 0 | 3.086578  | -2.076765 | 1.118738  |
| 64 | 6  | 0 | 3.477337  | -1.318827 | -1.133436 |
| 65 | 6  | 0 | 3.357306  | -3.390335 | 0.727771  |
| 66 | 1  | 0 | 2.841552  | -1.861534 | 2.156027  |
| 67 | 6  | 0 | 3.750366  | -2.627462 | -1.526915 |
| 68 | 1  | 0 | 3.530995  | -0.513210 | -1.860023 |
| 69 | 6  | 0 | 3.690388  | -3.670069 | -0.597467 |
| 70 | 1  | 0 | 3.315680  | -4.190704 | 1.462075  |
| 71 | 1  | 0 | 4.008863  | -2.834759 | -2.562134 |



|    |   |   |          |           |           |
|----|---|---|----------|-----------|-----------|
| 72 | 1 | 0 | 3.906761 | -4.690009 | -0.904375 |
| 73 | 1 | 0 | 0.855603 | 1.776969  | 0.473707  |

-----

Zero-point correction= 0.594020 (Hartree/Particle)  
Thermal correction to Energy= 0.633112  
Thermal correction to Enthalpy= 0.634057  
Thermal correction to Gibbs Free Energy= 0.521872  
Sum of electronic and zero-point Energies= -2020.515656  
Sum of electronic and thermal Energies= -2020.476563  
Sum of electronic and thermal Enthalpies= -2020.475619  
Sum of electronic and thermal Free Energies= -2020.587803  
M06/6-311++G(d,p)-SDD/SMD//B3LYP/6-31G(d)-LANL2DZ energy in tetrahydrofuran solvent = -2021.466694

## INT7

-----

| Center<br>Number | Atomic<br>Number | Atomic<br>Type | Coordinates (Angstroms) |           |           |
|------------------|------------------|----------------|-------------------------|-----------|-----------|
|                  |                  |                | X                       | Y         | Z         |
| 1                | 6                | 0              | -3.454829               | 1.212437  | 0.652245  |
| 2                | 6                | 0              | -4.346897               | 0.334364  | -0.051766 |
| 3                | 6                | 0              | -4.501277               | -0.883030 | 0.727481  |
| 4                | 6                | 0              | -3.680164               | -0.762206 | 1.908530  |
| 5                | 6                | 0              | -3.013922               | 0.524574  | 1.840371  |
| 6                | 6                | 0              | -3.119464               | 2.620850  | 0.257247  |
| 7                | 1                | 0              | -2.183635               | 2.958624  | 0.709074  |
| 8                | 1                | 0              | -3.014520               | 2.727710  | -0.826151 |
| 9                | 1                | 0              | -3.912864               | 3.307597  | 0.585202  |
| 10               | 6                | 0              | -5.069168               | 0.663122  | -1.325311 |
| 11               | 1                | 0              | -4.467146               | 1.312196  | -1.968588 |
| 12               | 1                | 0              | -5.317206               | -0.239815 | -1.891786 |
| 13               | 1                | 0              | -6.012079               | 1.187179  | -1.113383 |
| 14               | 6                | 0              | -5.409536               | -2.030448 | 0.400430  |
| 15               | 1                | 0              | -6.406406               | -1.869131 | 0.835235  |
| 16               | 1                | 0              | -5.533491               | -2.148776 | -0.680161 |
| 17               | 1                | 0              | -5.016524               | -2.971701 | 0.792941  |
| 18               | 6                | 0              | -3.592070               | -1.751826 | 3.032105  |
| 19               | 1                | 0              | -3.690710               | -2.776952 | 2.665591  |
| 20               | 1                | 0              | -2.630190               | -1.683494 | 3.548324  |
| 21               | 1                | 0              | -4.384477               | -1.574377 | 3.773070  |
| 22               | 6                | 0              | -2.095693               | 1.081370  | 2.887162  |
| 23               | 1                | 0              | -1.520919               | 0.289531  | 3.376510  |
| 24               | 1                | 0              | -1.388518               | 1.798313  | 2.461164  |
| 25               | 1                | 0              | -2.670972               | 1.603326  | 3.665382  |
| 26               | 17               | 0              | -1.502099               | -2.912954 | 0.062028  |
| 27               | 44               | 0              | -2.457273               | -0.713214 | 0.156484  |
| 28               | 6                | 0              | 0.367028                | 1.320056  | -1.091760 |
| 29               | 6                | 0              | 0.507095                | 2.725737  | -0.624412 |
| 30               | 6                | 0              | 0.329614                | 3.822809  | -1.486788 |
| 31               | 6                | 0              | 0.818583                | 2.983424  | 0.724394  |
| 32               | 6                | 0              | 0.470833                | 5.127569  | -1.013877 |
| 33               | 1                | 0              | 0.076269                | 3.646926  | -2.524856 |
| 34               | 6                | 0              | 0.958692                | 4.289709  | 1.194180  |
| 35               | 1                | 0              | 0.939359                | 2.148459  | 1.408653  |
| 36               | 6                | 0              | 0.785874                | 5.368571  | 0.325076  |
| 37               | 1                | 0              | 0.335130                | 5.960655  | -1.698674 |
| 38               | 1                | 0              | 1.197694                | 4.462095  | 2.240332  |
| 39               | 1                | 0              | 0.893052                | 6.387131  | 0.688336  |
| 40               | 6                | 0              | -0.799991               | 0.985796  | -1.945225 |
| 41               | 8                | 0              | -1.158219               | -0.350260 | -1.852593 |
| 42               | 8                | 0              | -1.391375               | 1.742607  | -2.688488 |
| 43               | 6                | 0              | -1.872314               | -0.886483 | -2.994394 |
| 44               | 1                | 0              | -2.829915               | -0.379921 | -3.121502 |
| 45               | 1                | 0              | -1.261247               | -0.755383 | -3.891677 |
| 46               | 1                | 0              | -2.007807               | -1.942088 | -2.764358 |
| 47               | 6                | 0              | 2.601433                | 0.540807  | -0.286138 |
| 48               | 6                | 0              | 1.304968                | 0.342420  | -0.877163 |
| 49               | 6                | 0              | 3.571112                | -0.408367 | -0.098005 |

|    |   |   |          |           |           |
|----|---|---|----------|-----------|-----------|
| 50 | 6 | 0 | 4.909223 | 0.027220  | 0.383312  |
| 51 | 6 | 0 | 5.477891 | 1.244608  | -0.037134 |
| 52 | 6 | 0 | 5.635014 | -0.762974 | 1.295216  |
| 53 | 6 | 0 | 6.715679 | 1.663200  | 0.447748  |
| 54 | 1 | 0 | 4.955394 | 1.851496  | -0.770648 |
| 55 | 6 | 0 | 6.868779 | -0.339570 | 1.785748  |
| 56 | 1 | 0 | 5.216156 | -1.706616 | 1.630390  |
| 57 | 6 | 0 | 7.414980 | 0.875161  | 1.364688  |
| 58 | 1 | 0 | 7.139420 | 2.601702  | 0.100197  |
| 59 | 1 | 0 | 7.404464 | -0.959925 | 2.499407  |
| 60 | 1 | 0 | 8.380693 | 1.201012  | 1.741608  |
| 61 | 6 | 0 | 3.373368 | -1.858104 | -0.352689 |
| 62 | 6 | 0 | 2.220866 | -2.542584 | 0.072074  |
| 63 | 6 | 0 | 4.363078 | -2.583807 | -1.046974 |
| 64 | 6 | 0 | 2.052808 | -3.900138 | -0.204434 |
| 65 | 1 | 0 | 1.450574 | -2.022219 | 0.631293  |
| 66 | 6 | 0 | 4.192086 | -3.937093 | -1.325738 |
| 67 | 1 | 0 | 5.261674 | -2.073177 | -1.380354 |
| 68 | 6 | 0 | 3.035512 | -4.600494 | -0.904596 |
| 69 | 1 | 0 | 1.144333 | -4.393929 | 0.125067  |
| 70 | 1 | 0 | 4.961544 | -4.474650 | -1.873879 |
| 71 | 1 | 0 | 2.903808 | -5.657575 | -1.120053 |
| 72 | 1 | 0 | 1.075494 | -0.649839 | -1.249611 |
| 73 | 1 | 0 | 2.850883 | 1.558393  | -0.002809 |

-----  
Zero-point correction= 0.599824 (Hartree/Particle)

Thermal correction to Energy= 0.639220

Thermal correction to Enthalpy= 0.640165

Thermal correction to Gibbs Free Energy= 0.523957

Sum of electronic and zero-point Energies= -2020.661929

Sum of electronic and thermal Energies= -2020.622533

Sum of electronic and thermal Enthalpies= -2020.621588

Sum of electronic and thermal Free Energies= -2020.737796

M06/6-311++G(d,p)-SDD/SMD//B3LYP/6-31G(d)-LANL2DZ energy in tetrahydrofuran solvent = -2021.593816

#### INT7'

| Center<br>Number | Atomic<br>Number | Atomic<br>Type | Coordinates (Angstroms) |           |           |
|------------------|------------------|----------------|-------------------------|-----------|-----------|
|                  |                  |                | X                       | Y         | Z         |
| 1                | 6                | 0              | -2.963144               | 1.736565  | -0.011282 |
| 2                | 6                | 0              | -1.679254               | 2.336363  | -0.272866 |
| 3                | 6                | 0              | -1.326191               | 2.049449  | -1.643527 |
| 4                | 6                | 0              | -2.440974               | 1.332753  | -2.243038 |
| 5                | 6                | 0              | -3.419912               | 1.118079  | -1.235500 |
| 6                | 6                | 0              | -3.806496               | 1.912032  | 1.216763  |
| 7                | 1                | 0              | -4.470076               | 1.055288  | 1.366998  |
| 8                | 1                | 0              | -3.196794               | 2.018939  | 2.113926  |
| 9                | 1                | 0              | -4.438736               | 2.805568  | 1.112136  |
| 10               | 6                | 0              | -0.928907               | 3.248078  | 0.653074  |
| 11               | 1                | 0              | -1.096193               | 2.986907  | 1.700017  |
| 12               | 1                | 0              | 0.147269                | 3.225490  | 0.458104  |
| 13               | 1                | 0              | -1.263882               | 4.284987  | 0.508604  |
| 14               | 6                | 0              | -0.136169               | 2.560459  | -2.398956 |
| 15               | 1                | 0              | 0.667616                | 2.862764  | -1.722606 |
| 16               | 1                | 0              | 0.260636                | 1.788362  | -3.063873 |
| 17               | 1                | 0              | -0.407217               | 3.435227  | -3.007035 |
| 18               | 6                | 0              | -2.551823               | 0.970952  | -3.692049 |
| 19               | 1                | 0              | -2.880050               | 1.848784  | -4.266720 |
| 20               | 1                | 0              | -1.593825               | 0.630189  | -4.089119 |
| 21               | 1                | 0              | -3.277088               | 0.170110  | -3.856226 |
| 22               | 6                | 0              | -4.731166               | 0.408161  | -1.396811 |
| 23               | 1                | 0              | -4.746901               | -0.204459 | -2.301439 |
| 24               | 1                | 0              | -4.936788               | -0.247842 | -0.544746 |
| 25               | 1                | 0              | -5.554920               | 1.132045  | -1.465504 |
| 26               | 17               | 0              | -0.366185               | -1.137469 | -2.411701 |
| 27               | 44               | 0              | -1.456765               | 0.156518  | -0.571413 |

|    |   |   |           |           |           |
|----|---|---|-----------|-----------|-----------|
| 28 | 6 | 0 | -0.675583 | -0.521236 | 1.434112  |
| 29 | 6 | 0 | -1.849386 | -1.416059 | 1.319976  |
| 30 | 6 | 0 | -2.948628 | -1.359338 | 2.226857  |
| 31 | 6 | 0 | -1.952355 | -2.315783 | 0.223591  |
| 32 | 6 | 0 | -4.080043 | -2.125091 | 2.020887  |
| 33 | 1 | 0 | -2.897982 | -0.698481 | 3.082426  |
| 34 | 6 | 0 | -3.128256 | -3.063606 | 0.018079  |
| 35 | 1 | 0 | -1.109487 | -2.522233 | -0.421269 |
| 36 | 6 | 0 | -4.191671 | -2.970728 | 0.898615  |
| 37 | 1 | 0 | -4.894964 | -2.070738 | 2.738513  |
| 38 | 1 | 0 | -3.170614 | -3.737043 | -0.833244 |
| 39 | 1 | 0 | -5.090555 | -3.561741 | 0.746536  |
| 40 | 6 | 0 | -0.564545 | 0.326845  | 2.674157  |
| 41 | 8 | 0 | 0.639807  | 0.161895  | 3.259073  |
| 42 | 8 | 0 | -1.427436 | 1.029070  | 3.172483  |
| 43 | 6 | 0 | 0.850905  | 0.900462  | 4.473451  |
| 44 | 1 | 0 | 0.756436  | 1.974535  | 4.292408  |
| 45 | 1 | 0 | 0.124213  | 0.602893  | 5.233932  |
| 46 | 1 | 0 | 1.864239  | 0.652389  | 4.789104  |
| 47 | 6 | 0 | 1.608819  | 0.193600  | 0.585640  |
| 48 | 6 | 0 | 0.436264  | -0.662947 | 0.568312  |
| 49 | 6 | 0 | 2.852469  | -0.147144 | 0.145173  |
| 50 | 1 | 0 | 1.476070  | 1.199181  | 0.974462  |
| 51 | 6 | 0 | 3.931868  | 0.872444  | 0.100868  |
| 52 | 6 | 0 | 3.659294  | 2.220843  | -0.199402 |
| 53 | 6 | 0 | 5.267289  | 0.520753  | 0.377885  |
| 54 | 6 | 0 | 4.670650  | 3.179661  | -0.199979 |
| 55 | 1 | 0 | 2.646665  | 2.509598  | -0.464558 |
| 56 | 6 | 0 | 6.279023  | 1.479424  | 0.378490  |
| 57 | 1 | 0 | 5.506328  | -0.513161 | 0.606441  |
| 58 | 6 | 0 | 5.986910  | 2.814864  | 0.092061  |
| 59 | 1 | 0 | 4.432886  | 4.211793  | -0.445114 |
| 60 | 1 | 0 | 7.299631  | 1.181738  | 0.605246  |
| 61 | 1 | 0 | 6.777118  | 3.560835  | 0.086196  |
| 62 | 6 | 0 | 3.202694  | -1.540755 | -0.248897 |
| 63 | 6 | 0 | 2.952927  | -2.619314 | 0.617000  |
| 64 | 6 | 0 | 3.818469  | -1.805748 | -1.484673 |
| 65 | 6 | 0 | 3.288860  | -3.923916 | 0.251365  |
| 66 | 1 | 0 | 2.506947  | -2.424262 | 1.588325  |
| 67 | 6 | 0 | 4.146341  | -3.108738 | -1.853082 |
| 68 | 1 | 0 | 4.021314  | -0.982654 | -2.163477 |
| 69 | 6 | 0 | 3.882667  | -4.173366 | -0.986586 |
| 70 | 1 | 0 | 3.090498  | -4.743572 | 0.937241  |
| 71 | 1 | 0 | 4.605040  | -3.295092 | -2.820546 |
| 72 | 1 | 0 | 4.141975  | -5.188839 | -1.274187 |
| 73 | 1 | 0 | 0.559337  | -1.593115 | 0.029453  |

-----  
Zero-point correction= 0.599903 (Hartree/Particle)

Thermal correction to Energy= 0.638950

Thermal correction to Enthalpy= 0.639894

Thermal correction to Gibbs Free Energy= 0.526816

Sum of electronic and zero-point Energies= -2020.660919

Sum of electronic and thermal Energies= -2020.621873

Sum of electronic and thermal Enthalpies= -2020.620929

Sum of electronic and thermal Free Energies= -2020.734007

M06/6-311++G(d,p)-SDD/SMD//B3LYP/6-31G(d)-LANL2DZ energy in tetrahydrofuran solvent = -2021.606463

#### TS4

| Center<br>Number | Atomic<br>Number | Atomic<br>Type | Coordinates (Angstroms) |          |           |
|------------------|------------------|----------------|-------------------------|----------|-----------|
|                  |                  |                | X                       | Y        | Z         |
| 1                | 6                | 0              | 2.636627                | 1.516307 | -0.522776 |
| 2                | 6                | 0              | 3.000100                | 0.551282 | -1.520612 |
| 3                | 6                | 0              | 2.080089                | 0.704472 | -2.635445 |
| 4                | 6                | 0              | 1.153615                | 1.722772 | -2.295484 |
| 5                | 6                | 0              | 1.473067                | 2.222372 | -0.979265 |

|    |    |   |           |           |           |
|----|----|---|-----------|-----------|-----------|
| 6  | 6  | 0 | 3.438008  | 1.818381  | 0.710335  |
| 7  | 1  | 0 | 2.824297  | 2.234698  | 1.512418  |
| 8  | 1  | 0 | 3.928369  | 0.921651  | 1.098529  |
| 9  | 1  | 0 | 4.222107  | 2.551603  | 0.475349  |
| 10 | 6  | 0 | 4.220586  | -0.322826 | -1.518247 |
| 11 | 1  | 0 | 4.522838  | -0.586182 | -0.501158 |
| 12 | 1  | 0 | 4.030285  | -1.257091 | -2.051294 |
| 13 | 1  | 0 | 5.062807  | 0.190947  | -2.003889 |
| 14 | 6  | 0 | 2.186894  | -0.008307 | -3.951026 |
| 15 | 1  | 0 | 2.380409  | -1.074254 | -3.805047 |
| 16 | 1  | 0 | 1.265471  | 0.086438  | -4.533031 |
| 17 | 1  | 0 | 3.005846  | 0.413704  | -4.550539 |
| 18 | 6  | 0 | 0.124665  | 2.301700  | -3.223447 |
| 19 | 1  | 0 | -0.621223 | 2.886237  | -2.683093 |
| 20 | 1  | 0 | 0.610129  | 2.970704  | -3.947854 |
| 21 | 1  | 0 | -0.395934 | 1.526561  | -3.793498 |
| 22 | 6  | 0 | 0.890475  | 3.462480  | -0.362311 |
| 23 | 1  | 0 | -0.201210 | 3.480856  | -0.417435 |
| 24 | 1  | 0 | 1.178673  | 3.564274  | 0.686954  |
| 25 | 1  | 0 | 1.260425  | 4.356337  | -0.885299 |
| 26 | 17 | 0 | 1.427228  | -2.457876 | -1.621792 |
| 27 | 44 | 0 | 1.031765  | -0.135443 | -0.761636 |
| 28 | 6  | 0 | 1.054794  | -0.821799 | 1.113783  |
| 29 | 6  | 0 | 1.022148  | -0.045800 | 2.373329  |
| 30 | 6  | 0 | 1.518007  | -0.573727 | 3.588831  |
| 31 | 6  | 0 | 0.502607  | 1.263089  | 2.399570  |
| 32 | 6  | 0 | 1.503671  | 0.180348  | 4.759226  |
| 33 | 1  | 0 | 1.946178  | -1.568569 | 3.613924  |
| 34 | 6  | 0 | 0.475389  | 2.011951  | 3.572295  |
| 35 | 1  | 0 | 0.101266  | 1.674300  | 1.484569  |
| 36 | 6  | 0 | 0.980498  | 1.475351  | 4.759512  |
| 37 | 1  | 0 | 1.900924  | -0.247546 | 5.675498  |
| 38 | 1  | 0 | 0.054468  | 3.013851  | 3.558863  |
| 39 | 1  | 0 | 0.963215  | 2.058619  | 5.676267  |
| 40 | 6  | 0 | 1.571962  | -2.226368 | 1.320081  |
| 41 | 8  | 0 | 0.650263  | -3.196333 | 1.417562  |
| 42 | 8  | 0 | 2.766154  | -2.400281 | 1.468381  |
| 43 | 6  | 0 | 1.173233  | -4.539580 | 1.437307  |
| 44 | 1  | 0 | 1.699944  | -4.734373 | 0.500688  |
| 45 | 1  | 0 | 1.851579  | -4.674172 | 2.283128  |
| 46 | 1  | 0 | 0.301303  | -5.186493 | 1.534453  |
| 47 | 6  | 0 | -0.952998 | -0.689305 | -1.237541 |
| 48 | 6  | 0 | -0.839741 | -1.005593 | 0.149651  |
| 49 | 6  | 0 | -2.054585 | -0.198089 | -0.303207 |
| 50 | 6  | 0 | -2.325380 | 1.251265  | 0.000197  |
| 51 | 6  | 0 | -2.472815 | 1.704319  | 1.318331  |
| 52 | 6  | 0 | -2.629357 | 2.133924  | -1.044919 |
| 53 | 6  | 0 | -2.866334 | 3.018285  | 1.584597  |
| 54 | 1  | 0 | -2.287535 | 1.017210  | 2.138134  |
| 55 | 6  | 0 | -3.030565 | 3.446290  | -0.784934 |
| 56 | 1  | 0 | -2.568375 | 1.774451  | -2.067485 |
| 57 | 6  | 0 | -3.142889 | 3.895455  | 0.533535  |
| 58 | 1  | 0 | -2.970295 | 3.351183  | 2.614246  |
| 59 | 1  | 0 | -3.264753 | 4.114049  | -1.610244 |
| 60 | 1  | 0 | -3.456200 | 4.915482  | 0.739520  |
| 61 | 6  | 0 | -3.322927 | -1.047751 | -0.353951 |
| 62 | 6  | 0 | -4.589293 | -0.507909 | -0.067223 |
| 63 | 6  | 0 | -3.261387 | -2.413726 | -0.695106 |
| 64 | 6  | 0 | -5.739805 | -1.295477 | -0.116059 |
| 65 | 1  | 0 | -4.683629 | 0.538667  | 0.196588  |
| 66 | 6  | 0 | -4.412798 | -3.199735 | -0.743529 |
| 67 | 1  | 0 | -2.309704 | -2.877306 | -0.931231 |
| 68 | 6  | 0 | -5.660135 | -2.646581 | -0.453924 |
| 69 | 1  | 0 | -6.702791 | -0.845406 | 0.111622  |
| 70 | 1  | 0 | -4.329238 | -4.249682 | -1.011972 |
| 71 | 1  | 0 | -6.557008 | -3.258983 | -0.492525 |
| 72 | 1  | 0 | -1.093614 | -1.387587 | -2.055537 |

73 1 0 -0.893432 -2.002697 0.565840

-----  
Zero-point correction= 0.597329 (Hartree/Particle)  
Thermal correction to Energy= 0.635428  
Thermal correction to Enthalpy= 0.636372  
Thermal correction to Gibbs Free Energy= 0.527719  
Sum of electronic and zero-point Energies= -2020.542536  
Sum of electronic and thermal Energies= -2020.504437  
Sum of electronic and thermal Enthalpies= -2020.503493  
Sum of electronic and thermal Free Energies= -2020.612146  
M06/6-311++G(d,p)-SDD/SMD//B3LYP/6-31G(d)-LANL2DZ energy in tetrahydrofuran solvent = -2021.501971

TS4'

-----

| Center<br>Number | Atomic<br>Number | Atomic<br>Type | Coordinates (Angstroms) |           |           |
|------------------|------------------|----------------|-------------------------|-----------|-----------|
|                  |                  |                | X                       | Y         | Z         |
| 1                | 6                | 0              | 3.171653                | 0.419470  | -1.099388 |
| 2                | 6                | 0              | 2.817002                | -0.816649 | -1.747183 |
| 3                | 6                | 0              | 1.901198                | -0.496567 | -2.831298 |
| 4                | 6                | 0              | 1.650043                | 0.896015  | -2.786379 |
| 5                | 6                | 0              | 2.417059                | 1.475392  | -1.702722 |
| 6                | 6                | 0              | 4.247098                | 0.561550  | -0.061373 |
| 7                | 1                | 0              | 4.114347                | 1.453768  | 0.555502  |
| 8                | 1                | 0              | 4.275477                | -0.304767 | 0.605060  |
| 9                | 1                | 0              | 5.228039                | 0.637755  | -0.550452 |
| 10               | 6                | 0              | 3.454216                | -2.156553 | -1.522117 |
| 11               | 1                | 0              | 3.774322                | -2.277692 | -0.484092 |
| 12               | 1                | 0              | 2.743866                | -2.958861 | -1.734436 |
| 13               | 1                | 0              | 4.331601                | -2.284181 | -2.172621 |
| 14               | 6                | 0              | 1.402077                | -1.479032 | -3.848206 |
| 15               | 1                | 0              | 1.003010                | -2.371894 | -3.358276 |
| 16               | 1                | 0              | 0.606830                | -1.051610 | -4.465674 |
| 17               | 1                | 0              | 2.218159                | -1.784587 | -4.517383 |
| 18               | 6                | 0              | 0.833956                | 1.689846  | -3.764666 |
| 19               | 1                | 0              | 0.340107                | 2.544193  | -3.288566 |
| 20               | 1                | 0              | 1.477021                | 2.096715  | -4.557389 |
| 21               | 1                | 0              | 0.064114                | 1.079866  | -4.244569 |
| 22               | 6                | 0              | 2.591031                | 2.953245  | -1.485367 |
| 23               | 1                | 0              | 1.632066                | 3.484044  | -1.459333 |
| 24               | 1                | 0              | 3.120065                | 3.168523  | -0.553498 |
| 25               | 1                | 0              | 3.178722                | 3.397821  | -2.301065 |
| 26               | 17               | 0              | 0.030737                | -2.433209 | -0.853445 |
| 27               | 44               | 0              | 0.946032                | -0.134387 | -0.746290 |
| 28               | 6                | 0              | 1.148003                | -0.309806 | 1.218390  |
| 29               | 6                | 0              | 1.659383                | 0.676668  | 2.184690  |
| 30               | 6                | 0              | 2.050570                | 0.296893  | 3.492165  |
| 31               | 6                | 0              | 1.764225                | 2.046887  | 1.850813  |
| 32               | 6                | 0              | 2.525405                | 1.233920  | 4.404798  |
| 33               | 1                | 0              | 2.006657                | -0.745474 | 3.785748  |
| 34               | 6                | 0              | 2.229397                | 2.984895  | 2.766114  |
| 35               | 1                | 0              | 1.471575                | 2.361159  | 0.857298  |
| 36               | 6                | 0              | 2.613231                | 2.581762  | 4.048716  |
| 37               | 1                | 0              | 2.826125                | 0.911780  | 5.397690  |
| 38               | 1                | 0              | 2.291007                | 4.032086  | 2.482678  |
| 39               | 1                | 0              | 2.975553                | 3.313585  | 4.765575  |
| 40               | 6                | 0              | 1.055969                | -1.689940 | 1.798215  |
| 41               | 8                | 0              | -0.120757               | -2.019013 | 2.327706  |
| 42               | 8                | 0              | 2.059848                | -2.380599 | 1.828005  |
| 43               | 6                | 0              | -0.256756               | -3.403561 | 2.707330  |
| 44               | 1                | 0              | -0.106194               | -4.032803 | 1.828070  |
| 45               | 1                | 0              | 0.467330                | -3.661897 | 3.484521  |
| 46               | 1                | 0              | -1.276758               | -3.500731 | 3.075729  |
| 47               | 6                | 0              | -0.996444               | 0.803250  | -1.061053 |
| 48               | 6                | 0              | -0.816158               | 0.941103  | 0.310061  |
| 49               | 6                | 0              | -2.172713               | 0.443706  | -0.173511 |
| 50               | 1                | 0              | -0.994530               | 1.530059  | -1.866050 |

|    |   |   |           |           |           |
|----|---|---|-----------|-----------|-----------|
| 51 | 1 | 0 | -0.590389 | 1.756525  | 0.983777  |
| 52 | 6 | 0 | -3.230138 | 1.548053  | -0.133179 |
| 53 | 6 | 0 | -4.596297 | 1.256269  | 0.032356  |
| 54 | 6 | 0 | -2.873190 | 2.904055  | -0.273225 |
| 55 | 6 | 0 | -5.555335 | 2.268528  | 0.056170  |
| 56 | 1 | 0 | -4.914077 | 0.226678  | 0.140847  |
| 57 | 6 | 0 | -3.832387 | 3.917153  | -0.245817 |
| 58 | 1 | 0 | -1.833187 | 3.182282  | -0.406796 |
| 59 | 6 | 0 | -5.181611 | 3.606157  | -0.080872 |
| 60 | 1 | 0 | -6.602455 | 2.005515  | 0.183151  |
| 61 | 1 | 0 | -3.519416 | 4.952660  | -0.355043 |
| 62 | 1 | 0 | -5.930512 | 4.393372  | -0.060471 |
| 63 | 6 | 0 | -2.744464 | -0.933574 | 0.037946  |
| 64 | 6 | 0 | -3.016029 | -1.394372 | 1.330475  |
| 65 | 6 | 0 | -3.182367 | -1.690542 | -1.054231 |
| 66 | 6 | 0 | -3.698389 | -2.596646 | 1.528625  |
| 67 | 1 | 0 | -2.690482 | -0.806125 | 2.183489  |
| 68 | 6 | 0 | -3.861506 | -2.892968 | -0.861402 |
| 69 | 1 | 0 | -2.974237 | -1.337293 | -2.060041 |
| 70 | 6 | 0 | -4.122374 | -3.350546 | 0.432315  |
| 71 | 1 | 0 | -3.908484 | -2.939040 | 2.539482  |
| 72 | 1 | 0 | -4.183521 | -3.475104 | -1.720982 |
| 73 | 1 | 0 | -4.654575 | -4.286193 | 0.584608  |

-----  
Zero-point correction= 0.595830 (Hartree/Particle)  
Thermal correction to Energy= 0.634260  
Thermal correction to Enthalpy= 0.635204  
Thermal correction to Gibbs Free Energy= 0.525332  
Sum of electronic and zero-point Energies= -2020.531579  
Sum of electronic and thermal Energies= -2020.493150  
Sum of electronic and thermal Enthalpies= -2020.492205  
Sum of electronic and thermal Free Energies= -2020.602078  
M06/6-311++G(d,p)-SDD/SMD//B3LYP/6-31G(d)-LANL2DZ energy in tetrahydrofuran solvent = -2021.488559

## INT9

| Center<br>Number | Atomic<br>Number | Atomic<br>Type | Coordinates (Angstroms) |           |           |
|------------------|------------------|----------------|-------------------------|-----------|-----------|
|                  |                  |                | X                       | Y         | Z         |
| 1                | 6                | 0              | -2.967485               | -1.043746 | -0.461928 |
| 2                | 6                | 0              | -3.490491               | 0.265201  | -0.526866 |
| 3                | 6                | 0              | -3.008315               | 0.875170  | -1.758675 |
| 4                | 6                | 0              | -2.190163               | -0.086810 | -2.432243 |
| 5                | 6                | 0              | -2.125463               | -1.271662 | -1.622580 |
| 6                | 6                | 0              | -3.292882               | -2.045640 | 0.605862  |
| 7                | 1                | 0              | -2.614820               | -2.901110 | 0.586968  |
| 8                | 1                | 0              | -3.232216               | -1.591244 | 1.598056  |
| 9                | 1                | 0              | -4.315135               | -2.422324 | 0.462372  |
| 10               | 6                | 0              | -4.433877               | 0.905799  | 0.448065  |
| 11               | 1                | 0              | -4.308769               | 0.487450  | 1.449937  |
| 12               | 1                | 0              | -4.252119               | 1.982113  | 0.514427  |
| 13               | 1                | 0              | -5.479135               | 0.754995  | 0.141390  |
| 14               | 6                | 0              | -3.481337               | 2.183950  | -2.318430 |
| 15               | 1                | 0              | -3.579210               | 2.939680  | -1.536929 |
| 16               | 1                | 0              | -2.789418               | 2.575862  | -3.069110 |
| 17               | 1                | 0              | -4.460395               | 2.049029  | -2.800456 |
| 18               | 6                | 0              | -1.610283               | 0.053660  | -3.811144 |
| 19               | 1                | 0              | -0.687877               | -0.523406 | -3.920852 |
| 20               | 1                | 0              | -2.323737               | -0.317712 | -4.560986 |
| 21               | 1                | 0              | -1.388233               | 1.095782  | -4.055141 |
| 22               | 6                | 0              | -1.658664               | -2.606440 | -2.136729 |
| 23               | 1                | 0              | -0.659725               | -2.557142 | -2.582538 |
| 24               | 1                | 0              | -1.638477               | -3.364901 | -1.351708 |
| 25               | 1                | 0              | -2.344481               | -2.967361 | -2.917085 |
| 26               | 17               | 0              | -1.429063               | 2.993779  | 0.198424  |
| 27               | 44               | 0              | -1.138632               | 0.623137  | -0.560159 |
| 28               | 6                | 0              | -0.171281               | -0.150746 | 1.317210  |

|    |   |   |           |           |           |
|----|---|---|-----------|-----------|-----------|
| 29 | 6 | 0 | 0.040652  | -1.614678 | 1.608619  |
| 30 | 6 | 0 | 0.151914  | -2.015268 | 2.955383  |
| 31 | 6 | 0 | 0.164115  | -2.606459 | 0.629177  |
| 32 | 6 | 0 | 0.366719  | -3.348339 | 3.300586  |
| 33 | 1 | 0 | 0.070269  | -1.280264 | 3.749474  |
| 34 | 6 | 0 | 0.370040  | -3.943540 | 0.969967  |
| 35 | 1 | 0 | 0.100146  | -2.322459 | -0.408861 |
| 36 | 6 | 0 | 0.469316  | -4.324372 | 2.308089  |
| 37 | 1 | 0 | 0.446843  | -3.622079 | 4.349210  |
| 38 | 1 | 0 | 0.460247  | -4.685202 | 0.180778  |
| 39 | 1 | 0 | 0.625349  | -5.366228 | 2.574960  |
| 40 | 6 | 0 | -0.969242 | 0.517014  | 2.435516  |
| 41 | 8 | 0 | -0.340809 | 1.569634  | 2.991229  |
| 42 | 8 | 0 | -2.047825 | 0.111063  | 2.824991  |
| 43 | 6 | 0 | -1.130981 | 2.362382  | 3.895148  |
| 44 | 1 | 0 | -1.931473 | 2.854107  | 3.337727  |
| 45 | 1 | 0 | -1.552397 | 1.737198  | 4.685563  |
| 46 | 1 | 0 | -0.443630 | 3.100996  | 4.308183  |
| 47 | 6 | 0 | 0.710833  | 1.171922  | -0.980440 |
| 48 | 6 | 0 | 0.792086  | 0.746591  | 0.685409  |
| 49 | 6 | 0 | 1.924684  | 0.536661  | -0.394313 |
| 50 | 6 | 0 | 2.335404  | -0.859224 | -0.794423 |
| 51 | 6 | 0 | 3.067355  | -1.674808 | 0.080100  |
| 52 | 6 | 0 | 2.112415  | -1.304548 | -2.103235 |
| 53 | 6 | 0 | 3.551839  | -2.912598 | -0.339572 |
| 54 | 1 | 0 | 3.256848  | -1.335516 | 1.094550  |
| 55 | 6 | 0 | 2.590412  | -2.548128 | -2.524674 |
| 56 | 1 | 0 | 1.569569  | -0.664677 | -2.792669 |
| 57 | 6 | 0 | 3.311526  | -3.355561 | -1.643001 |
| 58 | 1 | 0 | 4.111288  | -3.534630 | 0.353635  |
| 59 | 1 | 0 | 2.412389  | -2.877518 | -3.545139 |
| 60 | 1 | 0 | 3.690669  | -4.319832 | -1.970855 |
| 61 | 6 | 0 | 3.116112  | 1.491947  | -0.210087 |
| 62 | 6 | 0 | 4.419024  | 1.113266  | -0.572824 |
| 63 | 6 | 0 | 2.930445  | 2.805488  | 0.263390  |
| 64 | 6 | 0 | 5.491976  | 1.998359  | -0.450587 |
| 65 | 1 | 0 | 4.606221  | 0.120144  | -0.961725 |
| 66 | 6 | 0 | 4.003164  | 3.687358  | 0.389097  |
| 67 | 1 | 0 | 1.943029  | 3.169195  | 0.529821  |
| 68 | 6 | 0 | 5.293048  | 3.288752  | 0.036740  |
| 69 | 1 | 0 | 6.486409  | 1.670793  | -0.742447 |
| 70 | 1 | 0 | 3.823057  | 4.691921  | 0.762264  |
| 71 | 1 | 0 | 6.128462  | 3.976529  | 0.135446  |
| 72 | 1 | 0 | 0.829050  | 2.247314  | -1.132442 |
| 73 | 1 | 0 | 0.848676  | 1.696906  | 1.198563  |

-----  
Zero-point correction= 0.599068 (Hartree/Particle)  
Thermal correction to Energy= 0.637561  
Thermal correction to Enthalpy= 0.638505  
Thermal correction to Gibbs Free Energy= 0.528942  
Sum of electronic and zero-point Energies= -2020.563692  
Sum of electronic and thermal Energies= -2020.525198  
Sum of electronic and thermal Enthalpies= -2020.524254  
Sum of electronic and thermal Free Energies= -2020.633817  
M06/6-311++G(d,p)-SDD/SMD//B3LYP/6-31G(d)-LANL2DZ energy in tetrahydrofuran solvent =

## TSS

| Center<br>Number | Atomic<br>Number | Atomic<br>Type | Coordinates (Angstroms) |           |           |
|------------------|------------------|----------------|-------------------------|-----------|-----------|
|                  |                  |                | X                       | Y         | Z         |
| 1                | 6                | 0              | 2.970889                | 1.042333  | -0.528332 |
| 2                | 6                | 0              | 3.510728                | -0.259567 | -0.467823 |
| 3                | 6                | 0              | 3.068042                | -0.980149 | -1.655977 |
| 4                | 6                | 0              | 2.247120                | -0.102116 | -2.423561 |
| 5                | 6                | 0              | 2.140275                | 1.149653  | -1.713853 |
| 6                | 6                | 0              | 3.256260                | 2.141345  | 0.451326  |

|    |    |   |           |           |           |
|----|----|---|-----------|-----------|-----------|
| 7  | 1  | 0 | 2.559316  | 2.975097  | 0.345154  |
| 8  | 1  | 0 | 3.186920  | 1.777064  | 1.479387  |
| 9  | 1  | 0 | 4.272068  | 2.527905  | 0.289693  |
| 10 | 6  | 0 | 4.436805  | -0.801835 | 0.580614  |
| 11 | 1  | 0 | 4.286178  | -0.296202 | 1.538017  |
| 12 | 1  | 0 | 4.261262  | -1.869859 | 0.738492  |
| 13 | 1  | 0 | 5.488308  | -0.670456 | 0.286737  |
| 14 | 6  | 0 | 3.571433  | -2.324814 | -2.086043 |
| 15 | 1  | 0 | 3.641849  | -3.013995 | -1.242527 |
| 16 | 1  | 0 | 2.916360  | -2.782563 | -2.832211 |
| 17 | 1  | 0 | 4.569559  | -2.216918 | -2.534610 |
| 18 | 6  | 0 | 1.697567  | -0.369205 | -3.796242 |
| 19 | 1  | 0 | 0.764404  | 0.174713  | -3.968242 |
| 20 | 1  | 0 | 2.415523  | -0.044819 | -4.563270 |
| 21 | 1  | 0 | 1.501970  | -1.432862 | -3.955848 |
| 22 | 6  | 0 | 1.653871  | 2.424521  | -2.347816 |
| 23 | 1  | 0 | 0.668173  | 2.310138  | -2.811282 |
| 24 | 1  | 0 | 1.593262  | 3.243819  | -1.628921 |
| 25 | 1  | 0 | 2.350090  | 2.738782  | -3.139102 |
| 26 | 17 | 0 | 1.436863  | -2.937924 | 0.377130  |
| 27 | 44 | 0 | 1.142221  | -0.607502 | -0.525452 |
| 28 | 6  | 0 | 0.100701  | 0.305031  | 1.338561  |
| 29 | 6  | 0 | -0.120174 | 1.789316  | 1.463460  |
| 30 | 6  | 0 | -0.251839 | 2.331011  | 2.757256  |
| 31 | 6  | 0 | -0.236363 | 2.667662  | 0.380419  |
| 32 | 6  | 0 | -0.485003 | 3.691290  | 2.952928  |
| 33 | 1  | 0 | -0.170245 | 1.686088  | 3.626307  |
| 34 | 6  | 0 | -0.464712 | 4.030536  | 0.571243  |
| 35 | 1  | 0 | -0.152547 | 2.272469  | -0.619712 |
| 36 | 6  | 0 | -0.587283 | 4.552315  | 1.859198  |
| 37 | 1  | 0 | -0.580602 | 4.076570  | 3.964603  |
| 38 | 1  | 0 | -0.552018 | 4.681658  | -0.294513 |
| 39 | 1  | 0 | -0.759439 | 5.614742  | 2.009715  |
| 40 | 6  | 0 | 0.946766  | -0.238950 | 2.484155  |
| 41 | 8  | 0 | 0.400439  | -1.310467 | 3.088955  |
| 42 | 8  | 0 | 1.990608  | 0.265708  | 2.854601  |
| 43 | 6  | 0 | 1.244946  | -1.998582 | 4.027375  |
| 44 | 1  | 0 | 2.076192  | -2.463984 | 3.492684  |
| 45 | 1  | 0 | 1.624019  | -1.305902 | 4.782159  |
| 46 | 1  | 0 | 0.611370  | -2.760708 | 4.481562  |
| 47 | 6  | 0 | -0.663417 | -1.169324 | -0.982705 |
| 48 | 6  | 0 | -0.799889 | -0.662003 | 0.782249  |
| 49 | 6  | 0 | -1.888195 | -0.589606 | -0.333711 |
| 50 | 6  | 0 | -2.407066 | 0.759363  | -0.780351 |
| 51 | 6  | 0 | -3.152437 | 1.566049  | 0.090490  |
| 52 | 6  | 0 | -2.263711 | 1.160340  | -2.114060 |
| 53 | 6  | 0 | -3.726925 | 2.754273  | -0.357679 |
| 54 | 1  | 0 | -3.279736 | 1.260560  | 1.125291  |
| 55 | 6  | 0 | -2.832469 | 2.354384  | -2.564643 |
| 56 | 1  | 0 | -1.707064 | 0.528596  | -2.800679 |
| 57 | 6  | 0 | -3.565568 | 3.154731  | -1.686796 |
| 58 | 1  | 0 | -4.294626 | 3.371559  | 0.333043  |
| 59 | 1  | 0 | -2.712931 | 2.650898  | -3.603517 |
| 60 | 1  | 0 | -4.013738 | 4.080967  | -2.036397 |
| 61 | 6  | 0 | -3.013953 | -1.622904 | -0.124448 |
| 62 | 6  | 0 | -4.348905 | -1.336327 | -0.450039 |
| 63 | 6  | 0 | -2.720144 | -2.919220 | 0.342022  |
| 64 | 6  | 0 | -5.352159 | -2.296058 | -0.299307 |
| 65 | 1  | 0 | -4.616979 | -0.358300 | -0.829977 |
| 66 | 6  | 0 | -3.723382 | -3.875765 | 0.494265  |
| 67 | 1  | 0 | -1.700812 | -3.208474 | 0.581253  |
| 68 | 6  | 0 | -5.047579 | -3.569423 | 0.178344  |
| 69 | 1  | 0 | -6.375600 | -2.040274 | -0.561171 |
| 70 | 1  | 0 | -3.462132 | -4.865207 | 0.859802  |
| 71 | 1  | 0 | -5.828948 | -4.314971 | 0.298398  |
| 72 | 1  | 0 | -0.768119 | -2.237327 | -1.202264 |
| 73 | 1  | 0 | -0.789427 | -1.605747 | 1.309060  |



```

-----
Zero-point correction=          0.598211 (Hartree/Particle)
Thermal correction to Energy=   0.636301
Thermal correction to Enthalpy= 0.637245
Thermal correction to Gibbs Free Energy= 0.528505
Sum of electronic and zero-point Energies= -2020.564138
Sum of electronic and thermal Energies= -2020.526049
Sum of electronic and thermal Enthalpies= -2020.525105
Sum of electronic and thermal Free Energies= -2020.633845
M06/6-311++G(d,p)-SDD/SMD//B3LYP/6-31G(d)-LANL2DZ energy in tetrahydrofuran solvent = -2021.521764

```

**INT10**

```

-----
Center      Atomic      Atomic      Coordinates (Angstroms)
Number      Number      Type        X             Y             Z
-----
  1          6          0          -2.625039    -1.213719    0.908025
  2          6          0          -3.648060    -0.248801    0.556431
  3          6          0          -4.290092    -0.691837    -0.676542
  4          6          0          -3.563910    -1.785264    -1.163535
  5          6          0          -2.496395    -2.108105    -0.209029
  6          6          0          -1.974162    -1.336228    2.253862
  7          1          0          -1.074071    -1.954756    2.212149
  8          1          0          -1.699167    -0.361428    2.665432
  9          1          0          -2.669619    -1.811644    2.960469
 10         6          0          -4.160703     0.847868    1.439338
 11          1          0          -3.368116     1.255811    2.071110
 12          1          0          -4.575351     1.667969    0.846864
 13          1          0          -4.958197     0.467622    2.094764
 14          6          0          -5.432464     0.022296    -1.335409
 15          1          0          -5.140915     1.037217    -1.630659
 16          1          0          -5.768649    -0.501226    -2.234144
 17          1          0          -6.287993     0.097319    -0.652649
 18          6          0          -3.781547    -2.525268    -2.449103
 19          1          0          -2.834396    -2.690770    -2.973745
 20          1          0          -4.224886    -3.512091    -2.258186
 21          1          0          -4.445034    -1.980466    -3.124649
 22          6          0          -1.631126    -3.333679    -0.283270
 23          1          0          -1.316212    -3.538204    -1.311576
 24          1          0          -0.729028    -3.227351     0.325374
 25          1          0          -2.177048    -4.218931     0.074154
 26          17         0          -2.478925     1.874719    -2.154933
 27          44         0          -1.969998    -0.064136    -0.823228
 28          6          0           2.401608    -1.327126     0.580031
 29          6          0           3.359037    -1.147906    -0.550926
 30          6          0           4.734454    -1.008088    -0.303577
 31          6          0           2.918380    -1.187801    -1.881063
 32          6          0           5.634571    -0.869830    -1.357641
 33          1          0           5.095308    -1.007595     0.719415
 34          6          0           3.820751    -1.054448    -2.937755
 35          1          0           1.866096    -1.349788    -2.092819
 36          6          0           5.180911    -0.888624    -2.678927
 37          1          0           6.694194    -0.752194    -1.146928
 38          1          0           3.457691    -1.085235    -3.961462
 39          1          0           5.884838    -0.783073    -3.500056
 40          6          0           2.625363    -2.580954     1.381959
 41          8          0           1.546895    -2.947452     2.127424
 42          8          0           3.655479    -3.222968     1.380448
 43          6          0           1.745723    -4.110902     2.946534
 44          1          0           1.992574    -4.977795     2.328361
 45          1          0           2.555778    -3.944620     3.661701
 46          1          0           0.800131    -4.265728     3.467206
 47          6          0          -0.157308     0.292112    -0.533247
 48          6          0           1.405056    -0.502679     0.981371
 49          6          0           0.867359     0.828886     0.454887
 50          6          0           1.881858     1.754591    -0.248082
 51          6          0           3.137002     2.002828     0.321731

```

|    |   |   |           |           |           |
|----|---|---|-----------|-----------|-----------|
| 52 | 6 | 0 | 1.514230  | 2.457979  | -1.403038 |
| 53 | 6 | 0 | 4.015816  | 2.913062  | -0.262682 |
| 54 | 1 | 0 | 3.429761  | 1.481321  | 1.228292  |
| 55 | 6 | 0 | 2.395660  | 3.369910  | -1.988526 |
| 56 | 1 | 0 | 0.529330  | 2.315076  | -1.841974 |
| 57 | 6 | 0 | 3.649999  | 3.598357  | -1.423667 |
| 58 | 1 | 0 | 4.988636  | 3.086441  | 0.189984  |
| 59 | 1 | 0 | 2.092535  | 3.905262  | -2.884352 |
| 60 | 1 | 0 | 4.335368  | 4.308581  | -1.878512 |
| 61 | 6 | 0 | 0.250455  | 1.647081  | 1.611131  |
| 62 | 6 | 0 | 0.735609  | 1.538881  | 2.921518  |
| 63 | 6 | 0 | -0.746851 | 2.596970  | 1.345129  |
| 64 | 6 | 0 | 0.224015  | 2.339711  | 3.946565  |
| 65 | 1 | 0 | 1.526132  | 0.829949  | 3.152746  |
| 66 | 6 | 0 | -1.254638 | 3.399773  | 2.367363  |
| 67 | 1 | 0 | -1.129634 | 2.708787  | 0.335746  |
| 68 | 6 | 0 | -0.776180 | 3.272249  | 3.674177  |
| 69 | 1 | 0 | 0.614730  | 2.234157  | 4.955421  |
| 70 | 1 | 0 | -2.025705 | 4.130616  | 2.137489  |
| 71 | 1 | 0 | -1.173487 | 3.898818  | 4.468299  |
| 72 | 1 | 0 | 0.368857  | -0.047781 | -1.445181 |
| 73 | 1 | 0 | 0.811885  | -0.866933 | 1.810622  |

-----

Zero-point correction= 0.597698 (Hartree/Particle)  
Thermal correction to Energy= 0.637003  
Thermal correction to Enthalpy= 0.637948  
Thermal correction to Gibbs Free Energy= 0.522950  
Sum of electronic and zero-point Energies= -2020.599656  
Sum of electronic and thermal Energies= -2020.560351  
Sum of electronic and thermal Enthalpies= -2020.559406  
Sum of electronic and thermal Free Energies= -2020.674404  
M06/6-311++G(d,p)-SDD/SMD//B3LYP/6-31G(d)-LANL2DZ energy in tetrahydrofuran solvent = -2021.546827

## TS6

-----

| Center<br>Number | Atomic<br>Number | Atomic<br>Type | Coordinates (Angstroms) |           |           |
|------------------|------------------|----------------|-------------------------|-----------|-----------|
|                  |                  |                | X                       | Y         | Z         |
| 1                | 6                | 0              | -2.908462               | -0.680535 | 1.189681  |
| 2                | 6                | 0              | -3.814461               | -0.005486 | 0.271378  |
| 3                | 6                | 0              | -4.041053               | -0.855551 | -0.860149 |
| 4                | 6                | 0              | -3.207680               | -2.016214 | -0.696708 |
| 5                | 6                | 0              | -2.541281               | -1.933554 | 0.591670  |
| 6                | 6                | 0              | -2.560015               | -0.202781 | 2.569087  |
| 7                | 1                | 0              | -1.644706               | -0.673906 | 2.939081  |
| 8                | 1                | 0              | -2.411585               | 0.881091  | 2.595600  |
| 9                | 1                | 0              | -3.365847               | -0.444495 | 3.277540  |
| 10               | 6                | 0              | -4.465236               | 1.321224  | 0.524432  |
| 11               | 1                | 0              | -3.794905               | 1.997427  | 1.063126  |
| 12               | 1                | 0              | -4.751300               | 1.808120  | -0.411518 |
| 13               | 1                | 0              | -5.373954               | 1.195219  | 1.130536  |
| 14               | 6                | 0              | -4.931990               | -0.555933 | -2.028988 |
| 15               | 1                | 0              | -4.923439               | 0.510200  | -2.271901 |
| 16               | 1                | 0              | -4.603796               | -1.087712 | -2.925958 |
| 17               | 1                | 0              | -5.969249               | -0.852676 | -1.820460 |
| 18               | 6                | 0              | -3.121203               | -3.173901 | -1.645716 |
| 19               | 1                | 0              | -2.152481               | -3.677339 | -1.575597 |
| 20               | 1                | 0              | -3.899221               | -3.917240 | -1.419966 |
| 21               | 1                | 0              | -3.256460               | -2.851831 | -2.681695 |
| 22               | 6                | 0              | -1.701305               | -3.010938 | 1.211655  |
| 23               | 1                | 0              | -1.148604               | -3.575697 | 0.453964  |
| 24               | 1                | 0              | -0.971267               | -2.601712 | 1.915156  |
| 25               | 1                | 0              | -2.329466               | -3.727628 | 1.760447  |
| 26               | 17               | 0              | -1.750807               | 0.960380  | -2.790879 |
| 27               | 44               | 0              | -1.867826               | -0.286961 | -0.684625 |
| 28               | 6                | 0              | 1.912442                | -1.140674 | 0.972077  |
| 29               | 6                | 0              | 2.840306                | -1.598808 | -0.087573 |

|    |   |   |           |           |           |
|----|---|---|-----------|-----------|-----------|
| 30 | 6 | 0 | 4.233802  | -1.497037 | 0.083219  |
| 31 | 6 | 0 | 2.351044  | -2.199080 | -1.261566 |
| 32 | 6 | 0 | 5.103265  | -1.938944 | -0.909641 |
| 33 | 1 | 0 | 4.629031  | -1.059850 | 0.992784  |
| 34 | 6 | 0 | 3.226192  | -2.655193 | -2.248042 |
| 35 | 1 | 0 | 1.283098  | -2.347891 | -1.384293 |
| 36 | 6 | 0 | 4.603816  | -2.517616 | -2.079883 |
| 37 | 1 | 0 | 6.175573  | -1.835601 | -0.767893 |
| 38 | 1 | 0 | 2.827302  | -3.122001 | -3.144464 |
| 39 | 1 | 0 | 5.285974  | -2.866666 | -2.850369 |
| 40 | 6 | 0 | 2.112571  | -1.763865 | 2.314317  |
| 41 | 8 | 0 | 1.119898  | -1.471421 | 3.200607  |
| 42 | 8 | 0 | 3.069161  | -2.450116 | 2.620881  |
| 43 | 6 | 0 | 1.302571  | -2.019883 | 4.515605  |
| 44 | 1 | 0 | 1.362778  | -3.110413 | 4.472356  |
| 45 | 1 | 0 | 2.219011  | -1.633164 | 4.969256  |
| 46 | 1 | 0 | 0.428681  | -1.704528 | 5.086479  |
| 47 | 6 | 0 | 0.148535  | 0.139178  | -0.620849 |
| 48 | 6 | 0 | 0.890385  | -0.216746 | 0.828209  |
| 49 | 6 | 0 | 0.932309  | 1.200291  | -0.043597 |
| 50 | 6 | 0 | 2.219205  | 1.642716  | -0.698210 |
| 51 | 6 | 0 | 3.326333  | 2.064631  | 0.052895  |
| 52 | 6 | 0 | 2.283997  | 1.708448  | -2.097629 |
| 53 | 6 | 0 | 4.482409  | 2.515805  | -0.580721 |
| 54 | 1 | 0 | 3.286607  | 2.035666  | 1.137709  |
| 55 | 6 | 0 | 3.437780  | 2.174062  | -2.730553 |
| 56 | 1 | 0 | 1.418032  | 1.419475  | -2.687470 |
| 57 | 6 | 0 | 4.541525  | 2.572332  | -1.975855 |
| 58 | 1 | 0 | 5.336467  | 2.827812  | 0.014656  |
| 59 | 1 | 0 | 3.469319  | 2.227232  | -3.815380 |
| 60 | 1 | 0 | 5.440908  | 2.930994  | -2.469328 |
| 61 | 6 | 0 | 0.260676  | 2.282535  | 0.783099  |
| 62 | 6 | 0 | 0.623266  | 2.563884  | 2.107710  |
| 63 | 6 | 0 | -0.709477 | 3.079906  | 0.157288  |
| 64 | 6 | 0 | 0.023779  | 3.617934  | 2.798816  |
| 65 | 1 | 0 | 1.361392  | 1.945020  | 2.610986  |
| 66 | 6 | 0 | -1.299118 | 4.140864  | 0.848178  |
| 67 | 1 | 0 | -0.997902 | 2.861651  | -0.866646 |
| 68 | 6 | 0 | -0.937541 | 4.412087  | 2.169433  |
| 69 | 1 | 0 | 0.309172  | 3.818004  | 3.828266  |
| 70 | 1 | 0 | -2.045613 | 4.753275  | 0.349336  |
| 71 | 1 | 0 | -1.400978 | 5.235835  | 2.705863  |
| 72 | 1 | 0 | 0.683546  | -0.341646 | -1.438183 |
| 73 | 1 | 0 | 0.255156  | -0.061867 | 1.686110  |

-----  
Zero-point correction= 0.596853 (Hartree/Particle)  
Thermal correction to Energy= 0.636062  
Thermal correction to Enthalpy= 0.637006  
Thermal correction to Gibbs Free Energy= 0.521623  
Sum of electronic and zero-point Energies= -2020.581613  
Sum of electronic and thermal Energies= -2020.542403  
Sum of electronic and thermal Enthalpies= -2020.541459  
Sum of electronic and thermal Free Energies= -2020.656842  
M06/6-311++G(d,p)-SDD/SMD//B3LYP/6-31G(d)-LANL2DZ energy in tetrahydrofuran solvent = -2021.532993

#### INT11

-----

| Center<br>Number | Atomic<br>Number | Atomic<br>Type | Coordinates (Angstroms) |          |           |
|------------------|------------------|----------------|-------------------------|----------|-----------|
|                  |                  |                | X                       | Y        | Z         |
| 1                | 6                | 0              | 0.831582                | 2.659809 | 0.731292  |
| 2                | 6                | 0              | 1.972495                | 2.538066 | -0.134018 |
| 3                | 6                | 0              | 1.576106                | 2.915422 | -1.478046 |
| 4                | 6                | 0              | 0.176654                | 3.261607 | -1.442906 |
| 5                | 6                | 0              | -0.285331               | 3.076057 | -0.079900 |
| 6                | 6                | 0              | 0.824401                | 2.487101 | 2.222397  |
| 7                | 1                | 0              | -0.161742               | 2.186492 | 2.587226  |

|    |    |   |           |           |           |
|----|----|---|-----------|-----------|-----------|
| 8  | 1  | 0 | 1.543045  | 1.730146  | 2.548314  |
| 9  | 1  | 0 | 1.087204  | 3.431024  | 2.721350  |
| 10 | 6  | 0 | 3.377448  | 2.223658  | 0.283803  |
| 11 | 1  | 0 | 3.405343  | 1.686659  | 1.233810  |
| 12 | 1  | 0 | 3.895992  | 1.617583  | -0.466015 |
| 13 | 1  | 0 | 3.951016  | 3.153347  | 0.408494  |
| 14 | 6  | 0 | 2.480125  | 3.010702  | -2.670232 |
| 15 | 1  | 0 | 3.314103  | 2.306613  | -2.596003 |
| 16 | 1  | 0 | 1.940274  | 2.786514  | -3.593464 |
| 17 | 1  | 0 | 2.902077  | 4.022395  | -2.755168 |
| 18 | 6  | 0 | -0.633782 | 3.783803  | -2.590988 |
| 19 | 1  | 0 | -1.694854 | 3.548279  | -2.470647 |
| 20 | 1  | 0 | -0.537599 | 4.876313  | -2.664431 |
| 21 | 1  | 0 | -0.307665 | 3.344624  | -3.536753 |
| 22 | 6  | 0 | -1.666458 | 3.388964  | 0.412179  |
| 23 | 1  | 0 | -2.418410 | 3.201744  | -0.359932 |
| 24 | 1  | 0 | -1.926954 | 2.788119  | 1.285844  |
| 25 | 1  | 0 | -1.738194 | 4.449229  | 0.694632  |
| 26 | 17 | 0 | -0.061895 | 0.243310  | -3.083132 |
| 27 | 44 | 0 | 0.420148  | 1.203211  | -0.909155 |
| 28 | 6  | 0 | -2.471949 | -0.571983 | 0.741265  |
| 29 | 6  | 0 | -3.229614 | -1.400999 | -0.236325 |
| 30 | 6  | 0 | -4.181883 | -2.331545 | 0.219518  |
| 31 | 6  | 0 | -3.007113 | -1.294285 | -1.617808 |
| 32 | 6  | 0 | -4.872048 | -3.142332 | -0.678553 |
| 33 | 1  | 0 | -4.381346 | -2.417586 | 1.282252  |
| 34 | 6  | 0 | -3.703475 | -2.105475 | -2.515729 |
| 35 | 1  | 0 | -2.290814 | -0.575140 | -2.000950 |
| 36 | 6  | 0 | -4.635562 | -3.033541 | -2.051438 |
| 37 | 1  | 0 | -5.598946 | -3.858923 | -0.304789 |
| 38 | 1  | 0 | -3.512611 | -2.003118 | -3.580616 |
| 39 | 1  | 0 | -5.177237 | -3.664623 | -2.751334 |
| 40 | 6  | 0 | -3.296310 | 0.139286  | 1.760409  |
| 41 | 8  | 0 | -2.556246 | 0.815764  | 2.692143  |
| 42 | 8  | 0 | -4.511670 | 0.132993  | 1.803570  |
| 43 | 6  | 0 | -3.327892 | 1.471682  | 3.708354  |
| 44 | 1  | 0 | -3.992337 | 2.220875  | 3.269493  |
| 45 | 1  | 0 | -3.932773 | 0.747036  | 4.260128  |
| 46 | 1  | 0 | -2.599621 | 1.944480  | 4.368861  |
| 47 | 6  | 0 | -0.133008 | -1.229581 | 0.041083  |
| 48 | 6  | 0 | -1.104968 | -0.493880 | 0.831763  |
| 49 | 6  | 0 | 1.133555  | -1.587852 | 0.471422  |
| 50 | 6  | 0 | 1.981675  | -2.475878 | -0.370806 |
| 51 | 6  | 0 | 2.801651  | -3.450438 | 0.235389  |
| 52 | 6  | 0 | 1.948615  | -2.420110 | -1.778078 |
| 53 | 6  | 0 | 3.553763  | -4.335846 | -0.534324 |
| 54 | 1  | 0 | 2.831523  | -3.531553 | 1.316685  |
| 55 | 6  | 0 | 2.710136  | -3.301292 | -2.542500 |
| 56 | 1  | 0 | 1.343752  | -1.669833 | -2.276843 |
| 57 | 6  | 0 | 3.515299  | -4.263386 | -1.927811 |
| 58 | 1  | 0 | 4.167493  | -5.085597 | -0.042013 |
| 59 | 1  | 0 | 2.675013  | -3.229034 | -3.626158 |
| 60 | 1  | 0 | 4.106794  | -4.949166 | -2.528604 |
| 61 | 6  | 0 | 1.641475  | -1.290249 | 1.841744  |
| 62 | 6  | 0 | 0.843530  | -1.492092 | 2.982508  |
| 63 | 6  | 0 | 2.975533  | -0.881071 | 2.033083  |
| 64 | 6  | 0 | 1.348349  | -1.256151 | 4.262600  |
| 65 | 1  | 0 | -0.169346 | -1.863161 | 2.868388  |
| 66 | 6  | 0 | 3.476629  | -0.635762 | 3.309916  |
| 67 | 1  | 0 | 3.618196  | -0.757846 | 1.167425  |
| 68 | 6  | 0 | 2.662108  | -0.818273 | 4.431771  |
| 69 | 1  | 0 | 0.713807  | -1.426505 | 5.128059  |
| 70 | 1  | 0 | 4.506762  | -0.311121 | 3.430768  |
| 71 | 1  | 0 | 3.054571  | -0.634966 | 5.428268  |
| 72 | 1  | 0 | -0.483151 | -1.681469 | -0.879739 |
| 73 | 1  | 0 | -0.714729 | 0.085775  | 1.657640  |

Zero-point correction= 0.599985 (Hartree/Particle)  
 Thermal correction to Energy= 0.639477  
 Thermal correction to Enthalpy= 0.640421  
 Thermal correction to Gibbs Free Energy= 0.524946  
 Sum of electronic and zero-point Energies= -2020.654125  
 Sum of electronic and thermal Energies= -2020.614634  
 Sum of electronic and thermal Enthalpies= -2020.613689  
 Sum of electronic and thermal Free Energies= -2020.729165  
 M06/6-311++G(d,p)-SDD/SMD//B3LYP/6-31G(d)-LANL2DZ energy in tetrahydrofuran solvent = -2021.59743

**E-P**

| Center<br>Number | Atomic<br>Number | Atomic<br>Type | Coordinates (Angstroms) |           |           |
|------------------|------------------|----------------|-------------------------|-----------|-----------|
|                  |                  |                | X                       | Y         | Z         |
| 1                | 6                | 0              | 2.175313                | 0.447678  | -0.112141 |
| 2                | 6                | 0              | 2.793685                | -0.873215 | 0.171650  |
| 3                | 6                | 0              | 3.830117                | -1.385360 | -0.629568 |
| 4                | 6                | 0              | 2.351790                | -1.645839 | 1.259976  |
| 5                | 6                | 0              | 4.384634                | -2.634975 | -0.362374 |
| 6                | 1                | 0              | 4.200276                | -0.797235 | -1.461289 |
| 7                | 6                | 0              | 2.911004                | -2.895004 | 1.529297  |
| 8                | 1                | 0              | 1.576146                | -1.251454 | 1.910059  |
| 9                | 6                | 0              | 3.927927                | -3.396084 | 0.716364  |
| 10               | 1                | 0              | 5.180071                | -3.014956 | -0.998186 |
| 11               | 1                | 0              | 2.556025                | -3.471172 | 2.379802  |
| 12               | 1                | 0              | 4.366679                | -4.368307 | 0.924916  |
| 13               | 6                | 0              | 3.108535                | 1.589158  | -0.340278 |
| 14               | 8                | 0              | 2.466747                | 2.773117  | -0.523477 |
| 15               | 8                | 0              | 4.322485                | 1.502573  | -0.366062 |
| 16               | 6                | 0              | 3.323362                | 3.900758  | -0.743293 |
| 17               | 1                | 0              | 3.990381                | 4.052997  | 0.109836  |
| 18               | 1                | 0              | 3.929756                | 3.756857  | -1.641899 |
| 19               | 1                | 0              | 2.655638                | 4.754705  | -0.864909 |
| 20               | 6                | 0              | -0.196386               | -0.348465 | -0.121669 |
| 21               | 6                | 0              | 0.828266                | 0.664233  | -0.169072 |
| 22               | 6                | 0              | -1.544294               | -0.126902 | -0.070442 |
| 23               | 6                | 0              | -2.482882               | -1.268285 | -0.219966 |
| 24               | 6                | 0              | -2.184503               | -2.350877 | -1.069345 |
| 25               | 6                | 0              | -3.692242               | -1.307477 | 0.499867  |
| 26               | 6                | 0              | -3.050699               | -3.436350 | -1.179616 |
| 27               | 1                | 0              | -1.277622               | -2.325144 | -1.666123 |
| 28               | 6                | 0              | -4.556014               | -2.395482 | 0.391999  |
| 29               | 1                | 0              | -3.944705               | -0.483994 | 1.160664  |
| 30               | 6                | 0              | -4.239424               | -3.465612 | -0.447219 |
| 31               | 1                | 0              | -2.801941               | -4.256017 | -1.848515 |
| 32               | 1                | 0              | -5.478014               | -2.408143 | 0.967326  |
| 33               | 1                | 0              | -4.916253               | -4.311112 | -0.535775 |
| 34               | 6                | 0              | -2.125850               | 1.224756  | 0.148507  |
| 35               | 6                | 0              | -1.661203               | 2.064189  | 1.176270  |
| 36               | 6                | 0              | -3.171255               | 1.691680  | -0.670186 |
| 37               | 6                | 0              | -2.209831               | 3.332400  | 1.368366  |
| 38               | 1                | 0              | -0.878163               | 1.707584  | 1.838650  |
| 39               | 6                | 0              | -3.712007               | 2.961732  | -0.484046 |
| 40               | 1                | 0              | -3.549046               | 1.053710  | -1.463839 |
| 41               | 6                | 0              | -3.233599               | 3.787467  | 0.536709  |
| 42               | 1                | 0              | -1.839940               | 3.961542  | 2.173592  |
| 43               | 1                | 0              | -4.509434               | 3.307916  | -1.136287 |
| 44               | 1                | 0              | -3.660946               | 4.775413  | 0.685791  |
| 45               | 1                | 0              | 0.500466                | 1.686481  | -0.322371 |
| 46               | 1                | 0              | 0.140089                | -1.379941 | -0.173888 |

Zero-point correction= 0.373635 (Hartree/Particle)  
 Thermal correction to Energy= 0.396044  
 Thermal correction to Enthalpy= 0.396988  
 Thermal correction to Gibbs Free Energy= 0.318923  
 Sum of electronic and zero-point Energies= -1076.666807

Sum of electronic and thermal Energies= -1076.644399  
 Sum of electronic and thermal Enthalpies= -1076.643455  
 Sum of electronic and thermal Free Energies= -1076.721519  
 M06/6-311++G(d,p)-SDD/SMD//B3LYP/6-31G(d)-LANL2DZ energy in tetrahydrofuran solvent = -1076.530716

**INT10'**

| Center<br>Number | Atomic<br>Number | Atomic<br>Type | Coordinates (Angstroms) |           |           |
|------------------|------------------|----------------|-------------------------|-----------|-----------|
|                  |                  |                | X                       | Y         | Z         |
| 1                | 6                | 0              | -4.263480               | 0.221524  | -0.407103 |
| 2                | 6                | 0              | -3.940487               | 1.548415  | -0.678877 |
| 3                | 6                | 0              | -2.841580               | 1.554093  | -1.658024 |
| 4                | 6                | 0              | -2.636364               | 0.191858  | -2.101109 |
| 5                | 6                | 0              | -3.414628               | -0.648916 | -1.232517 |
| 6                | 6                | 0              | -5.269494               | -0.295254 | 0.578946  |
| 7                | 1                | 0              | -4.825818               | -1.046002 | 1.242481  |
| 8                | 1                | 0              | -5.670622               | 0.504132  | 1.206560  |
| 9                | 1                | 0              | -6.112314               | -0.775310 | 0.063189  |
| 10               | 6                | 0              | -4.499775               | 2.787555  | -0.048066 |
| 11               | 1                | 0              | -3.720513               | 3.324637  | 0.505493  |
| 12               | 1                | 0              | -4.900483               | 3.465809  | -0.812356 |
| 13               | 1                | 0              | -5.308123               | 2.556624  | 0.650779  |
| 14               | 6                | 0              | -2.296555               | 2.794933  | -2.302503 |
| 15               | 1                | 0              | -2.120875               | 3.575878  | -1.557754 |
| 16               | 1                | 0              | -1.347765               | 2.598946  | -2.809239 |
| 17               | 1                | 0              | -3.003256               | 3.187316  | -3.048421 |
| 18               | 6                | 0              | -1.853701               | -0.233146 | -3.308236 |
| 19               | 1                | 0              | -1.472656               | -1.254208 | -3.208292 |
| 20               | 1                | 0              | -2.487826               | -0.202306 | -4.204728 |
| 21               | 1                | 0              | -0.998333               | 0.425073  | -3.488154 |
| 22               | 6                | 0              | -3.619694               | -2.131518 | -1.370748 |
| 23               | 1                | 0              | -2.751202               | -2.619149 | -1.823355 |
| 24               | 1                | 0              | -3.798795               | -2.606298 | -0.400473 |
| 25               | 1                | 0              | -4.490179               | -2.351677 | -2.005595 |
| 26               | 17               | 0              | -1.239180               | 2.251073  | 1.368115  |
| 27               | 44               | 0              | -1.832252               | 0.438038  | -0.103075 |
| 28               | 6                | 0              | 2.815567                | 0.607630  | -0.041447 |
| 29               | 6                | 0              | 3.451346                | 1.935499  | 0.196202  |
| 30               | 6                | 0              | 4.848238                | 2.103472  | 0.169878  |
| 31               | 6                | 0              | 2.642742                | 3.060584  | 0.452163  |
| 32               | 6                | 0              | 5.415772                | 3.353939  | 0.412309  |
| 33               | 1                | 0              | 5.483345                | 1.246807  | -0.023990 |
| 34               | 6                | 0              | 3.218133                | 4.306432  | 0.695537  |
| 35               | 1                | 0              | 1.560764                | 2.962362  | 0.446254  |
| 36               | 6                | 0              | 4.606193                | 4.459970  | 0.677722  |
| 37               | 1                | 0              | 6.497395                | 3.461167  | 0.397213  |
| 38               | 1                | 0              | 2.575547                | 5.161258  | 0.889031  |
| 39               | 1                | 0              | 5.052165                | 5.433613  | 0.863321  |
| 40               | 6                | 0              | 3.504190                | -0.277133 | -1.043454 |
| 41               | 8                | 0              | 2.739520                | -0.495751 | -2.134757 |
| 42               | 8                | 0              | 4.633557                | -0.707829 | -0.927912 |
| 43               | 6                | 0              | 3.330563                | -1.346626 | -3.134890 |
| 44               | 1                | 0              | 4.283407                | -0.931957 | -3.472630 |
| 45               | 1                | 0              | 3.492487                | -2.348241 | -2.729950 |
| 46               | 1                | 0              | 2.610638                | -1.374906 | -3.953226 |
| 47               | 6                | 0              | -0.166436               | -0.320909 | -0.521748 |
| 48               | 6                | 0              | 1.700754                | 0.256711  | 0.638672  |
| 49               | 6                | 0              | 0.773004                | -0.948819 | 0.503649  |
| 50               | 1                | 0              | 0.264782                | -0.338847 | -1.527916 |
| 51               | 1                | 0              | 1.316810                | 0.990599  | 1.339174  |
| 52               | 6                | 0              | 0.028340                | -1.216772 | 1.830526  |
| 53               | 6                | 0              | 0.545676                | -0.836900 | 3.075430  |
| 54               | 6                | 0              | -1.194492               | -1.908261 | 1.802523  |
| 55               | 6                | 0              | -0.151622               | -1.107736 | 4.252945  |
| 56               | 1                | 0              | 1.496578                | -0.316415 | 3.132009  |
| 57               | 6                | 0              | -1.896550               | -2.175180 | 2.982169  |

|    |   |   |           |           |           |
|----|---|---|-----------|-----------|-----------|
| 58 | 1 | 0 | -1.575012 | -2.284230 | 0.858334  |
| 59 | 6 | 0 | -1.380882 | -1.769289 | 4.211885  |
| 60 | 1 | 0 | 0.266845  | -0.795324 | 5.205928  |
| 61 | 1 | 0 | -2.840031 | -2.713481 | 2.935805  |
| 62 | 1 | 0 | -1.923843 | -1.974629 | 5.130323  |
| 63 | 6 | 0 | 1.428683  | -2.267353 | 0.060963  |
| 64 | 6 | 0 | 2.584106  | -2.734879 | 0.703498  |
| 65 | 6 | 0 | 0.837380  | -3.078711 | -0.916362 |
| 66 | 6 | 0 | 3.138158  | -3.970521 | 0.369351  |
| 67 | 1 | 0 | 3.058093  | -2.124111 | 1.466059  |
| 68 | 6 | 0 | 1.386964  | -4.318495 | -1.250477 |
| 69 | 1 | 0 | -0.063341 | -2.740111 | -1.421463 |
| 70 | 6 | 0 | 2.541790  | -4.769224 | -0.609077 |
| 71 | 1 | 0 | 4.039176  | -4.307625 | 0.874500  |
| 72 | 1 | 0 | 0.910216  | -4.931349 | -2.011499 |
| 73 | 1 | 0 | 2.972122  | -5.733128 | -0.867098 |

-----  
Zero-point correction= 0.598034 (Hartree/Particle)  
Thermal correction to Energy= 0.637285  
Thermal correction to Enthalpy= 0.638230  
Thermal correction to Gibbs Free Energy= 0.524130  
Sum of electronic and zero-point Energies= -2020.605527  
Sum of electronic and thermal Energies= -2020.566275  
Sum of electronic and thermal Enthalpies= -2020.565331  
Sum of electronic and thermal Free Energies= -2020.679431  
M06/6-311++G(d,p)-SDD/SMD//B3LYP/6-31G(d)-LANL2DZ energy in tetrahydrofuran solvent = -2021.550576

#### TS6'

| Center<br>Number | Atomic<br>Number | Atomic<br>Type | Coordinates (Angstroms) |           |           |
|------------------|------------------|----------------|-------------------------|-----------|-----------|
|                  |                  |                | X                       | Y         | Z         |
| 1                | 6                | 0              | 4.048656                | 0.341574  | -0.120100 |
| 2                | 6                | 0              | 4.088799                | -1.002438 | -0.597183 |
| 3                | 6                | 0              | 3.172415                | -1.090067 | -1.709024 |
| 4                | 6                | 0              | 2.681126                | 0.245535  | -2.005706 |
| 5                | 6                | 0              | 3.202452                | 1.130744  | -1.005884 |
| 6                | 6                | 0              | 4.827621                | 0.891526  | 1.039169  |
| 7                | 1                | 0              | 4.310098                | 1.735187  | 1.505812  |
| 8                | 1                | 0              | 4.993021                | 0.133137  | 1.809028  |
| 9                | 1                | 0              | 5.810834                | 1.253409  | 0.706936  |
| 10               | 6                | 0              | 4.853562                | -2.151339 | -0.011098 |
| 11               | 1                | 0              | 4.208838                | -3.024122 | 0.130884  |
| 12               | 1                | 0              | 5.684847                | -2.440730 | -0.668801 |
| 13               | 1                | 0              | 5.273803                | -1.897020 | 0.965244  |
| 14               | 6                | 0              | 2.913010                | -2.319575 | -2.527800 |
| 15               | 1                | 0              | 2.948475                | -3.220928 | -1.910183 |
| 16               | 1                | 0              | 1.930227                | -2.280086 | -3.006237 |
| 17               | 1                | 0              | 3.667828                | -2.422104 | -3.321025 |
| 18               | 6                | 0              | 1.865124                | 0.620781  | -3.207239 |
| 19               | 1                | 0              | 1.370911                | 1.587530  | -3.073018 |
| 20               | 1                | 0              | 2.502882                | 0.697721  | -4.098597 |
| 21               | 1                | 0              | 1.086897                | -0.120113 | -3.414904 |
| 22               | 6                | 0              | 3.055709                | 2.624475  | -0.964497 |
| 23               | 1                | 0              | 2.130833                | 2.950272  | -1.449726 |
| 24               | 1                | 0              | 3.040880                | 3.001882  | 0.062943  |
| 25               | 1                | 0              | 3.890689                | 3.117144  | -1.482901 |
| 26               | 17               | 0              | 1.542809                | -2.249336 | 1.457031  |
| 27               | 44               | 0              | 1.951816                | -0.408893 | -0.055852 |
| 28               | 6                | 0              | -2.185075               | -0.918923 | -0.624599 |
| 29               | 6                | 0              | -2.912446               | -2.122635 | -0.166054 |
| 30               | 6                | 0              | -3.555138               | -2.985264 | -1.079587 |
| 31               | 6                | 0              | -2.971022               | -2.460248 | 1.203081  |
| 32               | 6                | 0              | -4.209968               | -4.133911 | -0.644575 |
| 33               | 1                | 0              | -3.539926               | -2.752476 | -2.137670 |
| 34               | 6                | 0              | -3.632747               | -3.605357 | 1.635589  |
| 35               | 1                | 0              | -2.511202               | -1.810373 | 1.941025  |

|    |   |   |           |           |           |
|----|---|---|-----------|-----------|-----------|
| 36 | 6 | 0 | -4.253254 | -4.452638 | 0.714391  |
| 37 | 1 | 0 | -4.688026 | -4.784066 | -1.372517 |
| 38 | 1 | 0 | -3.666080 | -3.834152 | 2.697338  |
| 39 | 1 | 0 | -4.766655 | -5.348698 | 1.052358  |
| 40 | 6 | 0 | -2.728444 | -0.254561 | -1.838647 |
| 41 | 8 | 0 | -1.802923 | 0.425769  | -2.565608 |
| 42 | 8 | 0 | -3.898278 | -0.302163 | -2.177929 |
| 43 | 6 | 0 | -2.334676 | 1.167583  | -3.674645 |
| 44 | 1 | 0 | -2.843994 | 0.500799  | -4.374974 |
| 45 | 1 | 0 | -3.040945 | 1.924176  | -3.322989 |
| 46 | 1 | 0 | -1.472791 | 1.638298  | -4.149200 |
| 47 | 6 | 0 | 0.074456  | 0.500655  | -0.305689 |
| 48 | 6 | 0 | -1.079930 | -0.479740 | 0.111706  |
| 49 | 6 | 0 | -0.797885 | 1.178324  | 0.641844  |
| 50 | 1 | 0 | -0.101042 | 0.874255  | -1.307852 |
| 51 | 1 | 0 | -0.806653 | -1.100992 | 0.953035  |
| 52 | 6 | 0 | -0.562430 | 1.154514  | 2.117854  |
| 53 | 6 | 0 | -1.628116 | 1.243223  | 3.035153  |
| 54 | 6 | 0 | 0.745710  | 1.078507  | 2.623981  |
| 55 | 6 | 0 | -1.390948 | 1.216489  | 4.405422  |
| 56 | 1 | 0 | -2.646749 | 1.325467  | 2.671045  |
| 57 | 6 | 0 | 0.983384  | 1.052153  | 3.998991  |
| 58 | 1 | 0 | 1.582611  | 1.061215  | 1.929064  |
| 59 | 6 | 0 | -0.082856 | 1.117183  | 4.893523  |
| 60 | 1 | 0 | -2.227180 | 1.274300  | 5.096903  |
| 61 | 1 | 0 | 2.003610  | 0.983490  | 4.365717  |
| 62 | 1 | 0 | 0.099723  | 1.100758  | 5.964542  |
| 63 | 6 | 0 | -1.708179 | 2.273592  | 0.148684  |
| 64 | 6 | 0 | -3.107992 | 2.190648  | 0.166037  |
| 65 | 6 | 0 | -1.111507 | 3.458388  | -0.312525 |
| 66 | 6 | 0 | -3.888370 | 3.261393  | -0.277932 |
| 67 | 1 | 0 | -3.593654 | 1.279741  | 0.500071  |
| 68 | 6 | 0 | -1.890991 | 4.530988  | -0.743808 |
| 69 | 1 | 0 | -0.027595 | 3.538031  | -0.322210 |
| 70 | 6 | 0 | -3.284745 | 4.435229  | -0.730204 |
| 71 | 1 | 0 | -4.971032 | 3.170566  | -0.271348 |
| 72 | 1 | 0 | -1.409323 | 5.440815  | -1.092582 |
| 73 | 1 | 0 | -3.894049 | 5.267967  | -1.070750 |

-----  
Zero-point correction= 0.596993 (Hartree/Particle)

Thermal correction to Energy= 0.636093

Thermal correction to Enthalpy= 0.637037

Thermal correction to Gibbs Free Energy= 0.522131

Sum of electronic and zero-point Energies= -2020.583958

Sum of electronic and thermal Energies= -2020.544857

Sum of electronic and thermal Enthalpies= -2020.543913

Sum of electronic and thermal Free Energies= -2020.658819

M06/6-311++G(d,p)-SDD/SMD//B3LYP/6-31G(d)-LANL2DZ energy in tetrahydrofuran solvent = -2021.531723

## INT11'

| Center<br>Number | Atomic<br>Number | Atomic<br>Type | Coordinates (Angstroms) |           |          |
|------------------|------------------|----------------|-------------------------|-----------|----------|
|                  |                  |                | X                       | Y         | Z        |
| 1                | 6                | 0              | -1.747499               | -0.538329 | 2.835171 |
| 2                | 6                | 0              | -2.948443               | -0.841863 | 2.136122 |
| 3                | 6                | 0              | -2.646928               | -1.864115 | 1.140127 |
| 4                | 6                | 0              | -1.252876               | -2.174448 | 1.234675 |
| 5                | 6                | 0              | -0.672996               | -1.304063 | 2.237781 |
| 6                | 6                | 0              | -1.606126               | 0.413015  | 3.983855 |
| 7                | 1                | 0              | -0.609346               | 0.858436  | 4.014569 |
| 8                | 1                | 0              | -2.324741               | 1.232424  | 3.918074 |
| 9                | 1                | 0              | -1.771618               | -0.120298 | 4.930727 |
| 10               | 6                | 0              | -4.305785               | -0.268261 | 2.416977 |
| 11               | 1                | 0              | -4.910073               | -0.208999 | 1.507137 |
| 12               | 1                | 0              | -4.851491               | -0.892327 | 3.138748 |
| 13               | 1                | 0              | -4.231633               | 0.740724  | 2.830460 |



|    |    |   |           |           |           |
|----|----|---|-----------|-----------|-----------|
| 14 | 6  | 0 | -3.665689 | -2.602198 | 0.321937  |
| 15 | 1  | 0 | -4.551029 | -1.986329 | 0.137141  |
| 16 | 1  | 0 | -3.258400 | -2.906640 | -0.644239 |
| 17 | 1  | 0 | -4.001757 | -3.502776 | 0.855605  |
| 18 | 6  | 0 | -0.554885 | -3.322569 | 0.565662  |
| 19 | 1  | 0 | 0.510598  | -3.123346 | 0.418209  |
| 20 | 1  | 0 | -0.630195 | -4.220769 | 1.195010  |
| 21 | 1  | 0 | -1.001566 | -3.559312 | -0.402530 |
| 22 | 6  | 0 | 0.738583  | -1.359200 | 2.742191  |
| 23 | 1  | 0 | 1.443479  | -1.620163 | 1.949560  |
| 24 | 1  | 0 | 1.052324  | -0.397370 | 3.156920  |
| 25 | 1  | 0 | 0.831743  | -2.112604 | 3.537571  |
| 26 | 17 | 0 | -1.378223 | 2.341864  | 1.207464  |
| 27 | 44 | 0 | -1.480733 | -0.028579 | 0.658652  |
| 28 | 6  | 0 | -0.848569 | -0.097089 | -1.490335 |
| 29 | 6  | 0 | -1.956957 | 0.827449  | -1.905573 |
| 30 | 6  | 0 | -3.297949 | 0.388024  | -1.943948 |
| 31 | 6  | 0 | -1.687479 | 2.164417  | -2.268289 |
| 32 | 6  | 0 | -4.326407 | 1.263166  | -2.299515 |
| 33 | 1  | 0 | -3.520016 | -0.646843 | -1.721857 |
| 34 | 6  | 0 | -2.714842 | 3.028824  | -2.623575 |
| 35 | 1  | 0 | -0.664149 | 2.522404  | -2.280636 |
| 36 | 6  | 0 | -4.042100 | 2.585719  | -2.632973 |
| 37 | 1  | 0 | -5.351382 | 0.902257  | -2.320120 |
| 38 | 1  | 0 | -2.480444 | 4.053013  | -2.900037 |
| 39 | 1  | 0 | -4.842724 | 3.265713  | -2.911225 |
| 40 | 6  | 0 | -0.852484 | -1.417708 | -2.217411 |
| 41 | 8  | 0 | 0.335043  | -1.678161 | -2.811391 |
| 42 | 8  | 0 | -1.809017 | -2.158931 | -2.358365 |
| 43 | 6  | 0 | 0.378353  | -2.874761 | -3.606783 |
| 44 | 1  | 0 | 0.202825  | -3.758925 | -2.987751 |
| 45 | 1  | 0 | -0.377866 | -2.837646 | -4.394751 |
| 46 | 1  | 0 | 1.380441  | -2.900554 | -4.035864 |
| 47 | 6  | 0 | 1.529342  | -0.280767 | -0.606035 |
| 48 | 6  | 0 | 0.297065  | 0.439416  | -0.855373 |
| 49 | 6  | 0 | 2.754746  | 0.228396  | -0.283777 |
| 50 | 1  | 0 | 1.476393  | -1.357349 | -0.718693 |
| 51 | 1  | 0 | 0.324192  | 1.513015  | -0.718844 |
| 52 | 6  | 0 | 3.037469  | 1.672702  | -0.059114 |
| 53 | 6  | 0 | 4.159612  | 2.266324  | -0.670061 |
| 54 | 6  | 0 | 2.221091  | 2.475773  | 0.755200  |
| 55 | 6  | 0 | 4.441975  | 3.618495  | -0.489688 |
| 56 | 1  | 0 | 4.806210  | 1.659709  | -1.297749 |
| 57 | 6  | 0 | 2.508288  | 3.829824  | 0.937982  |
| 58 | 1  | 0 | 1.353545  | 2.049849  | 1.247501  |
| 59 | 6  | 0 | 3.616337  | 4.407049  | 0.316918  |
| 60 | 1  | 0 | 5.307368  | 4.057535  | -0.979707 |
| 61 | 1  | 0 | 1.856363  | 4.428753  | 1.567788  |
| 62 | 1  | 0 | 3.837633  | 5.461561  | 0.459935  |
| 63 | 6  | 0 | 3.901619  | -0.715492 | -0.165313 |
| 64 | 6  | 0 | 4.034549  | -1.821195 | -1.026950 |
| 65 | 6  | 0 | 4.879667  | -0.537102 | 0.831990  |
| 66 | 6  | 0 | 5.087076  | -2.724160 | -0.882262 |
| 67 | 1  | 0 | 3.317844  | -1.951877 | -1.832686 |
| 68 | 6  | 0 | 5.929223  | -1.442543 | 0.979056  |
| 69 | 1  | 0 | 4.803996  | 0.314031  | 1.501805  |
| 70 | 6  | 0 | 6.037964  | -2.542044 | 0.124226  |
| 71 | 1  | 0 | 5.172831  | -3.564400 | -1.566794 |
| 72 | 1  | 0 | 6.664323  | -1.288900 | 1.764920  |
| 73 | 1  | 0 | 6.860480  | -3.243572 | 0.234930  |

-----

|                                            |                             |
|--------------------------------------------|-----------------------------|
| Zero-point correction=                     | 0.599958 (Hartree/Particle) |
| Thermal correction to Energy=              | 0.639116                    |
| Thermal correction to Enthalpy=            | 0.640061                    |
| Thermal correction to Gibbs Free Energy=   | 0.525788                    |
| Sum of electronic and zero-point Energies= | -2020.661868                |
| Sum of electronic and thermal Energies=    | -2020.622709                |

Sum of electronic and thermal Enthalpies= -2020.621765  
 Sum of electronic and thermal Free Energies= -2020.736038  
 M06/6-311++G(d,p)-SDD/SMD//B3LYP/6-31G(d)-LANL2DZ energy in tetrahydrofuran solvent = -2021.607627

**Z-P1**

| Center<br>Number | Atomic<br>Number | Atomic<br>Type | Coordinates (Angstroms) |           |           |
|------------------|------------------|----------------|-------------------------|-----------|-----------|
|                  |                  |                | X                       | Y         | Z         |
| 1                | 6                | 0              | 2.009461                | -0.752146 | -0.032237 |
| 2                | 6                | 0              | 3.255880                | 0.034167  | -0.238874 |
| 3                | 6                | 0              | 4.414033                | -0.202292 | 0.524550  |
| 4                | 6                | 0              | 3.293324                | 1.072035  | -1.187327 |
| 5                | 6                | 0              | 5.551355                | 0.584700  | 0.360674  |
| 6                | 1                | 0              | 4.421183                | -1.006840 | 1.250927  |
| 7                | 6                | 0              | 4.432598                | 1.858247  | -1.352449 |
| 8                | 1                | 0              | 2.427599                | 1.246688  | -1.819887 |
| 9                | 6                | 0              | 5.567154                | 1.620473  | -0.576065 |
| 10               | 1                | 0              | 6.430572                | 0.386835  | 0.968323  |
| 11               | 1                | 0              | 4.435993                | 2.648767  | -2.098451 |
| 12               | 1                | 0              | 6.458201                | 2.228975  | -0.705856 |
| 13               | 6                | 0              | 2.193318                | -2.214442 | 0.204858  |
| 14               | 8                | 0              | 1.098521                | -2.828998 | 0.724208  |
| 15               | 8                | 0              | 3.222829                | -2.823330 | -0.019373 |
| 16               | 6                | 0              | 1.246406                | -4.238396 | 0.954169  |
| 17               | 1                | 0              | 1.470098                | -4.762861 | 0.021249  |
| 18               | 1                | 0              | 2.053683                | -4.428258 | 1.666470  |
| 19               | 1                | 0              | 0.289847                | -4.567818 | 1.361611  |
| 20               | 6                | 0              | -0.536423               | -0.654036 | -0.070315 |
| 21               | 6                | 0              | 0.799987                | -0.114500 | -0.092985 |
| 22               | 6                | 0              | -1.684160               | 0.088648  | -0.027046 |
| 23               | 1                | 0              | -0.636884               | -1.730366 | -0.119808 |
| 24               | 6                | 0              | -2.997755               | -0.585123 | -0.190637 |
| 25               | 6                | 0              | -3.147208               | -1.693609 | -1.045958 |
| 26               | 6                | 0              | -4.130040               | -0.142183 | 0.519246  |
| 27               | 6                | 0              | -4.372820               | -2.343916 | -1.171160 |
| 28               | 1                | 0              | -2.299190               | -2.027798 | -1.636273 |
| 29               | 6                | 0              | -5.354442               | -0.795973 | 0.396956  |
| 30               | 1                | 0              | -4.040266               | 0.711292  | 1.184063  |
| 31               | 6                | 0              | -5.482087               | -1.900411 | -0.447792 |
| 32               | 1                | 0              | -4.464924               | -3.191518 | -1.845258 |
| 33               | 1                | 0              | -6.210867               | -0.442521 | 0.965163  |
| 34               | 1                | 0              | -6.438818               | -2.405823 | -0.548014 |
| 35               | 6                | 0              | -1.687450               | 1.559717  | 0.196468  |
| 36               | 6                | 0              | -0.957855               | 2.142051  | 1.248088  |
| 37               | 6                | 0              | -2.439615               | 2.405738  | -0.639937 |
| 38               | 6                | 0              | -0.964980               | 3.523251  | 1.445667  |
| 39               | 1                | 0              | -0.399268               | 1.501198  | 1.923680  |
| 40               | 6                | 0              | -2.438622               | 3.785362  | -0.447966 |
| 41               | 1                | 0              | -3.017326               | 1.972616  | -1.451392 |
| 42               | 6                | 0              | -1.701081               | 4.349850  | 0.596165  |
| 43               | 1                | 0              | -0.398502               | 3.951248  | 2.268382  |
| 44               | 1                | 0              | -3.015485               | 4.421824  | -1.113790 |
| 45               | 1                | 0              | -1.706035               | 5.425675  | 0.749235  |
| 46               | 1                | 0              | 0.855722                | 0.964025  | -0.215610 |

Zero-point correction= 0.373676 (Hartree/Particle)  
 Thermal correction to Energy= 0.396045  
 Thermal correction to Enthalpy= 0.396989  
 Thermal correction to Gibbs Free Energy= 0.318907  
 Sum of electronic and zero-point Energies= -1076.663146  
 Sum of electronic and thermal Energies= -1076.640777  
 Sum of electronic and thermal Enthalpies= -1076.639833  
 Sum of electronic and thermal Free Energies= -1076.717915  
 M06/6-311++G(d,p)-SDD/SMD//B3LYP/6-31G(d)-LANL2DZ energy in tetrahydrofuran solvent = -1076.526851

**ZnCl<sub>2</sub>**

| Center<br>Number | Atomic<br>Number | Atomic<br>Type | Coordinates (Angstroms) |          |           |
|------------------|------------------|----------------|-------------------------|----------|-----------|
|                  |                  |                | X                       | Y        | Z         |
| 1                | 30               | 0              | 0.000000                | 0.000000 | 0.000000  |
| 2                | 17               | 0              | 0.000000                | 0.000000 | 2.158093  |
| 3                | 17               | 0              | 0.000000                | 0.000000 | -2.158093 |

Zero-point correction= 0.002149 (Hartree/Particle)  
Thermal correction to Energy= 0.006704  
Thermal correction to Enthalpy= 0.007648  
Thermal correction to Gibbs Free Energy= -0.024433  
Sum of electronic and zero-point Energies= -986.073236  
Sum of electronic and thermal Energies= -986.068681  
Sum of electronic and thermal Enthalpies= -986.067737  
Sum of electronic and thermal Free Energies= -986.099818

M06/6-311++G(d,p)-SDD/SMD//B3LYP/6-31G(d)-LANL2DZ energy in dichloromethane solvent = -1147.703746

**3**

| Center<br>Number | Atomic<br>Number | Atomic<br>Type | Coordinates (Angstroms) |           |           |
|------------------|------------------|----------------|-------------------------|-----------|-----------|
|                  |                  |                | X                       | Y         | Z         |
| 1                | 6                | 0              | 0.184857                | 2.373714  | 1.144418  |
| 2                | 6                | 0              | 0.524986                | 2.974727  | 0.045405  |
| 3                | 6                | 0              | -0.005541               | 1.567913  | -0.123187 |
| 4                | 1                | 0              | 0.081192                | 2.402535  | 2.220315  |
| 5                | 1                | 0              | 0.905681                | 3.858104  | -0.448666 |
| 6                | 6                | 0              | -1.426224               | 1.369397  | -0.671762 |
| 7                | 1                | 0              | -1.952724               | 2.332640  | -0.638354 |
| 8                | 1                | 0              | -1.369790               | 1.083291  | -1.733558 |
| 9                | 6                | 0              | 0.948752                | 0.414498  | -0.472285 |
| 10               | 1                | 0              | 0.526689                | -0.528359 | -0.093848 |
| 11               | 1                | 0              | 0.973767                | 0.306551  | -1.568197 |
| 12               | 6                | 0              | 2.382104                | 0.556864  | 0.048776  |
| 13               | 1                | 0              | 2.366847                | 0.659757  | 1.143461  |
| 14               | 1                | 0              | 2.820398                | 1.491384  | -0.330215 |
| 15               | 6                | 0              | 3.283353                | -0.622090 | -0.339364 |
| 16               | 1                | 0              | 3.299420                | -0.723245 | -1.434939 |
| 17               | 1                | 0              | 2.845928                | -1.556546 | 0.043078  |
| 18               | 6                | 0              | 4.721875                | -0.489392 | 0.176892  |
| 19               | 1                | 0              | 4.707359                | -0.389126 | 1.272626  |
| 20               | 1                | 0              | 5.161091                | 0.444086  | -0.205982 |
| 21               | 6                | 0              | 5.624890                | -1.667702 | -0.209968 |
| 22               | 1                | 0              | 5.640213                | -1.767589 | -1.304740 |
| 23               | 1                | 0              | 5.186625                | -2.600386 | 0.173130  |
| 24               | 6                | 0              | 7.059418                | -1.527221 | 0.309502  |
| 25               | 1                | 0              | 7.079761                | -1.460539 | 1.404383  |
| 26               | 1                | 0              | 7.677971                | -2.383481 | 0.016802  |
| 27               | 1                | 0              | 7.536766                | -0.621424 | -0.084571 |
| 28               | 6                | 0              | -2.263506               | 0.325003  | 0.085499  |
| 29               | 1                | 0              | -2.314690               | 0.608466  | 1.147140  |
| 30               | 1                | 0              | -1.761317               | -0.651990 | 0.055517  |
| 31               | 6                | 0              | -3.686452               | 0.172766  | -0.468149 |
| 32               | 1                | 0              | -3.634377               | -0.107236 | -1.531018 |
| 33               | 1                | 0              | -4.194056               | 1.148565  | -0.437540 |
| 34               | 6                | 0              | -4.532036               | -0.861311 | 0.286175  |
| 35               | 1                | 0              | -4.584971               | -0.582219 | 1.349297  |
| 36               | 1                | 0              | -4.025714               | -1.837849 | 0.255047  |
| 37               | 6                | 0              | -5.954974               | -1.013212 | -0.266865 |
| 38               | 1                | 0              | -5.902375               | -1.292696 | -1.328854 |
| 39               | 1                | 0              | -6.461472               | -0.037943 | -0.235029 |
| 40               | 6                | 0              | -6.792281               | -2.047855 | 0.492012  |
| 41               | 1                | 0              | -7.801759               | -2.132345 | 0.073352  |
| 42               | 1                | 0              | -6.329417               | -3.041567 | 0.448220  |
| 43               | 1                | 0              | -6.892371               | -1.777443 | 1.550546  |

-----

Zero-point correction= 0.398438 (Hartree/Particle)  
 Thermal correction to Energy= 0.417890  
 Thermal correction to Enthalpy= 0.418834  
 Thermal correction to Gibbs Free Energy= 0.347686  
 Sum of electronic and zero-point Energies= -587.989541  
 Sum of electronic and thermal Energies= -587.970089  
 Sum of electronic and thermal Enthalpies= -587.969145  
 Sum of electronic and thermal Free Energies= -588.040293  
 M06/6-311++G(d,p)-SDD/SMD//B3LYP/6-31G(d)-LANL2DZ energy in dichloromethane solvent = -588.070642  
 M06/6-311++G(d,p)-SDD/SMD//B3LYP/6-31G(d)-LANL2DZ energy in tetrahydrofuran solvent = -588.067119

4

-----

| Center<br>Number | Atomic<br>Number | Atomic<br>Type | Coordinates (Angstroms) |           |           |
|------------------|------------------|----------------|-------------------------|-----------|-----------|
|                  |                  |                | X                       | Y         | Z         |
| 1                | 6                | 0              | 1.683074                | 0.628721  | -0.000103 |
| 2                | 6                | 0              | 0.262161                | 0.962278  | -0.000048 |
| 3                | 8                | 0              | -0.155574               | 2.103444  | -0.000033 |
| 4                | 7                | 0              | 2.086594                | -0.613793 | -0.000047 |
| 5                | 7                | 0              | 2.425260                | -1.700589 | 0.000177  |
| 6                | 8                | 0              | -0.518435               | -0.146179 | 0.000083  |
| 7                | 6                | 0              | -1.944695               | 0.094218  | 0.000143  |
| 8                | 1                | 0              | -2.202442               | 0.686797  | 0.883757  |
| 9                | 1                | 0              | -2.202461               | 0.687263  | -0.883148 |
| 10               | 1                | 0              | 2.441506                | 1.397979  | -0.000102 |
| 11               | 6                | 0              | -2.632443               | -1.257820 | -0.000171 |
| 12               | 1                | 0              | -3.719185               | -1.120137 | -0.000121 |
| 13               | 1                | 0              | -2.358464               | -1.836655 | -0.888012 |
| 14               | 1                | 0              | -2.358443               | -1.837074 | 0.887393  |

-----

Zero-point correction= 0.105490 (Hartree/Particle)  
 Thermal correction to Energy= 0.114001  
 Thermal correction to Enthalpy= 0.114946  
 Thermal correction to Gibbs Free Energy= 0.071416  
 Sum of electronic and zero-point Energies= -415.837969  
 Sum of electronic and thermal Energies= -415.829458  
 Sum of electronic and thermal Enthalpies= -415.828514  
 Sum of electronic and thermal Free Energies= -415.872044  
 M06/6-311++G(d,p)-SDD/SMD//B3LYP/6-31G(d)-LANL2DZ energy in dichloromethane solvent = -415.815035

**INT12**

-----

| Center<br>Number | Atomic<br>Number | Atomic<br>Type | Coordinates (Angstroms) |           |           |
|------------------|------------------|----------------|-------------------------|-----------|-----------|
|                  |                  |                | X                       | Y         | Z         |
| 1                | 6                | 0              | 1.450469                | 1.515753  | 0.000436  |
| 2                | 6                | 0              | 1.328360                | 0.087187  | 0.000954  |
| 3                | 8                | 0              | 0.232595                | -0.511227 | 0.001821  |
| 4                | 7                | 0              | 2.644060                | 2.067425  | -0.001278 |
| 5                | 7                | 0              | 3.665916                | 2.555958  | -0.002689 |
| 6                | 8                | 0              | 2.480166                | -0.573887 | 0.000481  |
| 7                | 6                | 0              | 2.420622                | -2.033405 | 0.000932  |
| 8                | 1                | 0              | 1.865557                | -2.351863 | 0.887226  |
| 9                | 1                | 0              | 1.864183                | -2.352413 | -0.884302 |
| 10               | 1                | 0              | 0.583746                | 2.169681  | 0.000849  |
| 11               | 6                | 0              | 3.849598                | -2.537339 | 0.000008  |
| 12               | 1                | 0              | 3.845860                | -3.632318 | 0.000357  |
| 13               | 1                | 0              | 4.387528                | -2.195367 | -0.889544 |
| 14               | 1                | 0              | 4.388890                | -2.194791 | 0.888512  |
| 15               | 30               | 0              | -1.764871               | -0.033387 | 0.000342  |
| 16               | 17               | 0              | -2.994355               | -1.859526 | -0.001831 |
| 17               | 17               | 0              | -1.955988               | 2.193805  | 0.000772  |

-----

Zero-point correction= 0.109215 (Hartree/Particle)  
 Thermal correction to Energy= 0.123510

Thermal correction to Enthalpy= 0.124455  
 Thermal correction to Gibbs Free Energy= 0.063545  
 Sum of electronic and zero-point Energies= -1401.943252  
 Sum of electronic and thermal Energies= -1401.928956  
 Sum of electronic and thermal Enthalpies= -1401.928012  
 Sum of electronic and thermal Free Energies= -1401.988921  
 M06/6-311++G(d,p)-SDD/SMD//B3LYP/6-31G(d)-LANL2DZ energy in dichloromethane solvent = -1563.531373

### TS7

| Center Number | Atomic Number | Atomic Type | Coordinates (Angstroms) |           |           |
|---------------|---------------|-------------|-------------------------|-----------|-----------|
|               |               |             | X                       | Y         | Z         |
| 1             | 6             | 0           | 0.070414                | 0.934106  | 0.856232  |
| 2             | 6             | 0           | 1.367317                | 0.320861  | 1.071327  |
| 3             | 8             | 0           | 1.245730                | -0.361299 | 2.084488  |
| 4             | 7             | 0           | 0.349348                | 2.255993  | -0.751332 |
| 5             | 7             | 0           | 0.380333                | 2.680369  | -1.770990 |
| 6             | 8             | 0           | 2.385152                | 0.422693  | 0.257108  |
| 7             | 6             | 0           | 3.518805                | -0.479408 | 0.515468  |
| 8             | 1             | 0           | 3.945098                | -0.209266 | 1.485324  |
| 9             | 1             | 0           | 3.121155                | -1.495369 | 0.571582  |
| 10            | 1             | 0           | -0.141051               | 1.764164  | 1.532761  |
| 11            | 6             | 0           | 4.499079                | -0.300246 | -0.623853 |
| 12            | 1             | 0           | 5.359137                | -0.959117 | -0.464635 |
| 13            | 1             | 0           | 4.036565                | -0.562728 | -1.579784 |
| 14            | 1             | 0           | 4.861203                | 0.731240  | -0.676199 |
| 15            | 30            | 0           | -1.491846               | -0.359353 | 0.000201  |
| 16            | 17            | 0           | -0.415546               | -1.916246 | -1.188014 |
| 17            | 17            | 0           | -3.544174               | 0.364135  | 0.431154  |

Zero-point correction= 0.104706 (Hartree/Particle)  
 Thermal correction to Energy= 0.120104  
 Thermal correction to Enthalpy= 0.121048  
 Thermal correction to Gibbs Free Energy= 0.055532  
 Sum of electronic and zero-point Energies= -1401.884108  
 Sum of electronic and thermal Energies= -1401.868710  
 Sum of electronic and thermal Enthalpies= -1401.867766  
 Sum of electronic and thermal Free Energies= -1401.933282  
 M06/6-311++G(d,p)-SDD/SMD//B3LYP/6-31G(d)-LANL2DZ energy in dichloromethane solvent = -1563.485958

### INT13

| Center Number | Atomic Number | Atomic Type | Coordinates (Angstroms) |           |           |
|---------------|---------------|-------------|-------------------------|-----------|-----------|
|               |               |             | X                       | Y         | Z         |
| 1             | 6             | 0           | -0.022055               | -1.510061 | -0.119902 |
| 2             | 6             | 0           | -1.368083               | -1.126687 | 0.077403  |
| 3             | 8             | 0           | -1.180234               | -1.325709 | 1.300880  |
| 4             | 8             | 0           | -2.360346               | -0.658515 | -0.579786 |
| 5             | 6             | 0           | -3.471097               | -0.064782 | 0.213682  |
| 6             | 1             | 0           | -3.901082               | -0.866570 | 0.818700  |
| 7             | 1             | 0           | -3.015909               | 0.688991  | 0.859542  |
| 8             | 1             | 0           | 0.131611                | -2.585904 | -0.223906 |
| 9             | 6             | 0           | -4.450768               | 0.521398  | -0.776263 |
| 10            | 1             | 0           | -5.280701               | 0.975566  | -0.224708 |
| 11            | 1             | 0           | -3.973403               | 1.297387  | -1.381029 |
| 12            | 1             | 0           | -4.856862               | -0.249468 | -1.437970 |
| 13            | 30            | 0           | 1.426208                | 0.116812  | -0.014314 |
| 14            | 17            | 0           | 0.105085                | 1.905687  | 0.359757  |
| 15            | 17            | 0           | 3.560018                | -0.365085 | -0.366785 |

Zero-point correction= 0.097827 (Hartree/Particle)  
 Thermal correction to Energy= 0.110398  
 Thermal correction to Enthalpy= 0.111342  
 Thermal correction to Gibbs Free Energy= 0.054454  
 Sum of electronic and zero-point Energies= -1292.370544  
 Sum of electronic and thermal Energies= -1292.357974

Sum of electronic and thermal Enthalpies= -1292.357030  
 Sum of electronic and thermal Free Energies= -1292.413917  
 M06/6-311++G(d,p)-SDD/SMD//B3LYP/6-31G(d)-LANL2DZ energy in dichloromethane solvent = -1453.995487

**INT14**

| Center<br>Number | Atomic<br>Number | Atomic<br>Type | Coordinates (Angstroms) |           |           |
|------------------|------------------|----------------|-------------------------|-----------|-----------|
|                  |                  |                | X                       | Y         | Z         |
| 1                | 6                | 0              | -0.554709               | -1.028920 | 0.747022  |
| 2                | 6                | 0              | -0.798512               | -1.599924 | -0.411078 |
| 3                | 6                | 0              | -0.630338               | -0.094670 | -0.444609 |
| 4                | 1                | 0              | -0.495455               | -1.116879 | 1.824062  |
| 5                | 1                | 0              | -1.074053               | -2.492276 | -0.958030 |
| 6                | 30               | 0              | 1.626232                | -2.370674 | 0.225437  |
| 7                | 17               | 0              | 2.657680                | -1.552782 | 1.996846  |
| 8                | 17               | 0              | 1.665793                | -3.888184 | -1.373918 |
| 9                | 6                | 0              | 0.649929                | 0.524767  | -1.015138 |
| 10               | 1                | 0              | 1.416027                | -0.263397 | -1.127582 |
| 11               | 1                | 0              | 0.455026                | 0.876862  | -2.038175 |
| 12               | 6                | 0              | -1.876074               | 0.784807  | -0.626364 |
| 13               | 1                | 0              | -1.683949               | 1.762374  | -0.163222 |
| 14               | 1                | 0              | -1.996364               | 0.981359  | -1.701987 |
| 15               | 6                | 0              | -3.185146               | 0.215318  | -0.067242 |
| 16               | 1                | 0              | -3.075036               | 0.020925  | 1.009747  |
| 17               | 1                | 0              | -3.393320               | -0.760803 | -0.529365 |
| 18               | 6                | 0              | -4.382974               | 1.147053  | -0.293294 |
| 19               | 1                | 0              | -4.493964               | 1.340270  | -1.370499 |
| 20               | 1                | 0              | -4.176003               | 2.123009  | 0.170094  |
| 21               | 6                | 0              | -5.701171               | 0.591153  | 0.261153  |
| 22               | 1                | 0              | -5.590449               | 0.398620  | 1.338777  |
| 23               | 1                | 0              | -5.907876               | -0.385315 | -0.201846 |
| 24               | 6                | 0              | -6.900316               | 1.521460  | 0.034795  |
| 25               | 1                | 0              | -7.011036               | 1.713230  | -1.041988 |
| 26               | 1                | 0              | -6.693622               | 2.497007  | 0.497500  |
| 27               | 6                | 0              | -8.212943               | 0.959896  | 0.591293  |
| 28               | 1                | 0              | -8.144857               | 0.790547  | 1.673039  |
| 29               | 1                | 0              | -9.048497               | 1.646468  | 0.413889  |
| 30               | 1                | 0              | -8.464522               | 0.000748  | 0.122005  |
| 31               | 6                | 0              | 1.243728                | 1.666756  | -0.175726 |
| 32               | 1                | 0              | 1.438146                | 1.300313  | 0.841330  |
| 33               | 1                | 0              | 0.506406                | 2.475774  | -0.082240 |
| 34               | 6                | 0              | 2.541157                | 2.232183  | -0.769339 |
| 35               | 1                | 0              | 2.351897                | 2.583072  | -1.794840 |
| 36               | 1                | 0              | 3.281761                | 1.423347  | -0.853960 |
| 37               | 6                | 0              | 3.138390                | 3.377512  | 0.058591  |
| 38               | 1                | 0              | 3.325429                | 3.024226  | 1.083064  |
| 39               | 1                | 0              | 2.399419                | 4.188398  | 0.145093  |
| 40               | 6                | 0              | 4.439782                | 3.940357  | -0.527996 |
| 41               | 1                | 0              | 4.253434                | 4.291261  | -1.553175 |
| 42               | 1                | 0              | 5.177487                | 3.130047  | -0.612921 |
| 43               | 6                | 0              | 5.030831                | 5.083554  | 0.303831  |
| 44               | 1                | 0              | 5.958414                | 5.462855  | -0.139912 |
| 45               | 1                | 0              | 4.329289                | 5.923824  | 0.378605  |
| 46               | 1                | 0              | 5.260475                | 4.752957  | 1.324248  |

Zero-point correction= 0.401623 (Hartree/Particle)  
 Thermal correction to Energy= 0.427245  
 Thermal correction to Enthalpy= 0.428189  
 Thermal correction to Gibbs Free Energy= 0.338946  
 Sum of electronic and zero-point Energies= -1574.068457  
 Sum of electronic and thermal Energies= -1574.042836  
 Sum of electronic and thermal Enthalpies= -1574.041892  
 Sum of electronic and thermal Free Energies= -1574.131134  
 M06/6-311++G(d,p)-SDD/SMD//B3LYP/6-31G(d)-LANL2DZ energy in dichloromethane solvent = -1735.783348

**TS8**

| Center<br>Number | Atomic<br>Number | Atomic<br>Type | Coordinates (Angstroms) |           |           |
|------------------|------------------|----------------|-------------------------|-----------|-----------|
|                  |                  |                | X                       | Y         | Z         |
| 1                | 6                | 0              | -0.229483               | 0.342332  | -2.352969 |
| 2                | 6                | 0              | -0.505806               | 1.442935  | -1.640328 |
| 3                | 6                | 0              | -0.033575               | -0.264762 | -1.074725 |
| 4                | 1                | 0              | -0.607017               | -0.055996 | -3.292250 |
| 5                | 1                | 0              | -1.370954               | 2.045752  | -1.942280 |
| 6                | 30               | 0              | 0.205243                | 2.518248  | 0.126099  |
| 7                | 17               | 0              | 1.972959                | 3.814011  | -0.280799 |
| 8                | 17               | 0              | -1.097904               | 2.087720  | 1.900163  |
| 9                | 6                | 0              | 1.276506                | -0.184229 | -0.313296 |
| 10               | 1                | 0              | 1.867585                | 0.670473  | -0.660913 |
| 11               | 1                | 0              | 1.076166                | -0.064412 | 0.759857  |
| 12               | 6                | 0              | -1.025261               | -1.316261 | -0.605479 |
| 13               | 1                | 0              | -0.906228               | -2.196638 | -1.257465 |
| 14               | 1                | 0              | -0.751305               | -1.634478 | 0.406816  |
| 15               | 6                | 0              | -2.497293               | -0.866689 | -0.615741 |
| 16               | 1                | 0              | -2.796578               | -0.600093 | -1.638667 |
| 17               | 1                | 0              | -2.588541               | 0.043191  | -0.008358 |
| 18               | 6                | 0              | -3.441335               | -1.946632 | -0.072356 |
| 19               | 1                | 0              | -3.141205               | -2.205572 | 0.953038  |
| 20               | 1                | 0              | -3.330016               | -2.865941 | -0.666881 |
| 21               | 6                | 0              | -4.913063               | -1.512447 | -0.074783 |
| 22               | 1                | 0              | -5.215158               | -1.253062 | -1.100628 |
| 23               | 1                | 0              | -5.019705               | -0.592090 | 0.517128  |
| 24               | 6                | 0              | -5.864117               | -2.583124 | 0.476512  |
| 25               | 1                | 0              | -5.563055               | -2.839725 | 1.501955  |
| 26               | 1                | 0              | -5.754034               | -3.504558 | -0.113182 |
| 27               | 6                | 0              | -7.332202               | -2.144230 | 0.470014  |
| 28               | 1                | 0              | -7.672964               | -1.913454 | -0.546958 |
| 29               | 1                | 0              | -7.984943               | -2.928421 | 0.869876  |
| 30               | 1                | 0              | -7.479269               | -1.244766 | 1.080197  |
| 31               | 6                | 0              | 2.112743                | -1.468769 | -0.524213 |
| 32               | 1                | 0              | 2.289694                | -1.610444 | -1.599169 |
| 33               | 1                | 0              | 1.551101                | -2.345532 | -0.177115 |
| 34               | 6                | 0              | 3.456696                | -1.398514 | 0.216066  |
| 35               | 1                | 0              | 3.271517                | -1.244344 | 1.288612  |
| 36               | 1                | 0              | 4.014962                | -0.516916 | -0.128482 |
| 37               | 6                | 0              | 4.314005                | -2.656122 | 0.020970  |
| 38               | 1                | 0              | 4.495933                | -2.810330 | -1.053034 |
| 39               | 1                | 0              | 3.752957                | -3.537800 | 0.365134  |
| 40               | 6                | 0              | 5.658809                | -2.592764 | 0.757831  |
| 41               | 1                | 0              | 5.476336                | -2.438282 | 1.830542  |
| 42               | 1                | 0              | 6.217846                | -1.711224 | 0.414278  |
| 43               | 6                | 0              | 6.512487                | -3.849669 | 0.559705  |
| 44               | 1                | 0              | 7.464298                | -3.773367 | 1.097203  |
| 45               | 1                | 0              | 5.993640                | -4.744038 | 0.926399  |
| 46               | 1                | 0              | 6.741038                | -4.011129 | -0.501045 |

Zero-point correction= 0.401332 (Hartree/Particle)  
 Thermal correction to Energy= 0.426472  
 Thermal correction to Enthalpy= 0.427417  
 Thermal correction to Gibbs Free Energy= 0.339232  
 Sum of electronic and zero-point Energies= -1574.055795  
 Sum of electronic and thermal Energies= -1574.030654  
 Sum of electronic and thermal Enthalpies= -1574.029710  
 Sum of electronic and thermal Free Energies= -1574.117895  
 M06/6-311++G(d,p)-SDD/SMD//B3LYP/6-31G(d)-LANL2DZ energy in dichloromethane solvent = -1735.764641

#### INT15

| Center<br>Number | Atomic<br>Number | Atomic<br>Type | Coordinates (Angstroms) |          |          |
|------------------|------------------|----------------|-------------------------|----------|----------|
|                  |                  |                | X                       | Y        | Z        |
| 1                | 6                | 0              | 0.714957                | 1.606070 | 1.367737 |
| 2                | 6                | 0              | -0.432406               | 2.326753 | 1.065754 |

|    |    |   |           |           |           |
|----|----|---|-----------|-----------|-----------|
| 3  | 6  | 0 | 1.041512  | 0.356821  | 0.814829  |
| 4  | 1  | 0 | 1.435765  | 1.994805  | 2.091683  |
| 5  | 1  | 0 | -0.464357 | 3.269091  | 1.626753  |
| 6  | 30 | 0 | -2.155313 | 1.952088  | -0.096486 |
| 7  | 17 | 0 | -3.918715 | 1.332719  | 1.166523  |
| 8  | 17 | 0 | -1.929387 | 2.009150  | -2.342575 |
| 9  | 6  | 0 | 0.205480  | -0.378294 | -0.171010 |
| 10 | 1  | 0 | -0.305551 | 0.300491  | -0.861264 |
| 11 | 1  | 0 | 0.849089  | -1.032865 | -0.771007 |
| 12 | 6  | 0 | 2.322276  | -0.289647 | 1.229104  |
| 13 | 1  | 0 | 2.610921  | 0.027572  | 2.237349  |
| 14 | 1  | 0 | 2.210043  | -1.380612 | 1.225076  |
| 15 | 6  | 0 | 3.464322  | 0.092880  | 0.237799  |
| 16 | 1  | 0 | 3.588795  | 1.182813  | 0.240661  |
| 17 | 1  | 0 | 3.171505  | -0.187775 | -0.781714 |
| 18 | 6  | 0 | 4.789737  | -0.588097 | 0.605361  |
| 19 | 1  | 0 | 4.650501  | -1.678548 | 0.604598  |
| 20 | 1  | 0 | 5.067973  | -0.313103 | 1.632687  |
| 21 | 6  | 0 | 5.931185  | -0.216624 | -0.351118 |
| 22 | 1  | 0 | 6.066688  | 0.874747  | -0.350564 |
| 23 | 1  | 0 | 5.649006  | -0.488764 | -1.378599 |
| 24 | 6  | 0 | 7.262282  | -0.893055 | 0.005296  |
| 25 | 1  | 0 | 7.125393  | -1.983637 | 0.005000  |
| 26 | 1  | 0 | 7.542768  | -0.621005 | 1.032664  |
| 27 | 6  | 0 | 8.399156  | -0.519629 | -0.951736 |
| 28 | 1  | 0 | 8.582747  | 0.561726  | -0.947135 |
| 29 | 1  | 0 | 9.334125  | -1.017393 | -0.671534 |
| 30 | 1  | 0 | 8.162172  | -0.810949 | -1.982254 |
| 31 | 6  | 0 | -0.849331 | -1.274892 | 0.557067  |
| 32 | 1  | 0 | -1.527007 | -0.635989 | 1.135750  |
| 33 | 1  | 0 | -0.341687 | -1.931132 | 1.276661  |
| 34 | 6  | 0 | -1.653091 | -2.116367 | -0.443617 |
| 35 | 1  | 0 | -0.972171 | -2.786624 | -0.988192 |
| 36 | 1  | 0 | -2.103405 | -1.453499 | -1.194607 |
| 37 | 6  | 0 | -2.755763 | -2.936607 | 0.239921  |
| 38 | 1  | 0 | -3.433628 | -2.253189 | 0.769226  |
| 39 | 1  | 0 | -2.308411 | -3.588384 | 1.005708  |
| 40 | 6  | 0 | -3.563747 | -3.792256 | -0.745596 |
| 41 | 1  | 0 | -2.884489 | -4.471587 | -1.280668 |
| 42 | 1  | 0 | -4.007569 | -3.138481 | -1.508734 |
| 43 | 6  | 0 | -4.669249 | -4.605047 | -0.063539 |
| 44 | 1  | 0 | -5.229674 | -5.203276 | -0.790960 |
| 45 | 1  | 0 | -4.253888 | -5.292292 | 0.684256  |
| 46 | 1  | 0 | -5.382460 | -3.948602 | 0.449109  |

-----  
Zero-point correction= 0.403545 (Hartree/Particle)  
Thermal correction to Energy= 0.428892  
Thermal correction to Enthalpy= 0.429837  
Thermal correction to Gibbs Free Energy= 0.341316  
Sum of electronic and zero-point Energies= -1574.079651  
Sum of electronic and thermal Energies= -1574.054303  
Sum of electronic and thermal Enthalpies= -1574.053359  
Sum of electronic and thermal Free Energies= -1574.141880  
M06/6-311++G(d,p)-SDD/SMD//B3LYP/6-31G(d)-LANL2DZ energy in dichloromethane solvent = -1735.791994

### TS8'

| Center<br>Number | Atomic<br>Number | Atomic<br>Type | Coordinates (Angstroms) |           |           |
|------------------|------------------|----------------|-------------------------|-----------|-----------|
|                  |                  |                | X                       | Y         | Z         |
| 1                | 6                | 0              | -0.414440               | -1.221549 | 0.733175  |
| 2                | 6                | 0              | 0.077433                | -1.589964 | -0.447091 |
| 3                | 6                | 0              | -0.998859               | -0.229455 | -0.110442 |
| 4                | 1                | 0              | -0.097156               | -1.390260 | 1.759599  |
| 5                | 1                | 0              | -0.048084               | -1.799426 | -1.494259 |
| 6                | 30               | 0              | 2.243389                | -2.052752 | -0.062712 |
| 7                | 17               | 0              | 2.552557                | -2.597515 | 2.075819  |



|    |    |   |           |           |           |
|----|----|---|-----------|-----------|-----------|
| 8  | 17 | 0 | 3.343899  | -1.728548 | -1.968611 |
| 9  | 6  | 0 | -2.370322 | -0.468029 | -0.730592 |
| 10 | 1  | 0 | -2.549863 | -1.546291 | -0.812836 |
| 11 | 1  | 0 | -2.386470 | -0.055447 | -1.749085 |
| 12 | 6  | 0 | -3.513339 | 0.167238  | 0.088554  |
| 13 | 1  | 0 | -3.481946 | -0.222680 | 1.115599  |
| 14 | 1  | 0 | -3.360550 | 1.252046  | 0.162964  |
| 15 | 6  | 0 | -4.893956 | -0.107676 | -0.523796 |
| 16 | 1  | 0 | -4.915627 | 0.272433  | -1.555734 |
| 17 | 1  | 0 | -5.049403 | -1.194091 | -0.595404 |
| 18 | 6  | 0 | -6.045705 | 0.519338  | 0.273051  |
| 19 | 1  | 0 | -5.890315 | 1.606195  | 0.343469  |
| 20 | 1  | 0 | -6.021823 | 0.141208  | 1.305829  |
| 21 | 6  | 0 | -7.427895 | 0.244347  | -0.334387 |
| 22 | 1  | 0 | -7.451134 | 0.621988  | -1.366499 |
| 23 | 1  | 0 | -7.582620 | -0.841698 | -0.404261 |
| 24 | 6  | 0 | -8.573237 | 0.873296  | 0.465989  |
| 25 | 1  | 0 | -8.465053 | 1.963426  | 0.523662  |
| 26 | 1  | 0 | -9.545165 | 0.659098  | 0.007429  |
| 27 | 1  | 0 | -8.597401 | 0.488647  | 1.493029  |
| 28 | 6  | 0 | -0.479731 | 1.202571  | -0.138438 |
| 29 | 1  | 0 | -1.011301 | 1.766405  | 0.643925  |
| 30 | 1  | 0 | -0.776072 | 1.662870  | -1.091560 |
| 31 | 6  | 0 | 1.032482  | 1.370406  | 0.061569  |
| 32 | 1  | 0 | 1.330486  | 0.942830  | 1.030075  |
| 33 | 1  | 0 | 1.569239  | 0.801564  | -0.711932 |
| 34 | 6  | 0 | 1.481807  | 2.836478  | 0.000601  |
| 35 | 1  | 0 | 0.944104  | 3.413986  | 0.767171  |
| 36 | 1  | 0 | 1.186869  | 3.265215  | -0.968327 |
| 37 | 6  | 0 | 2.993719  | 3.010377  | 0.195428  |
| 38 | 1  | 0 | 3.286454  | 2.584849  | 1.166675  |
| 39 | 1  | 0 | 3.527798  | 2.424942  | -0.566882 |
| 40 | 6  | 0 | 3.452581  | 4.473057  | 0.125421  |
| 41 | 1  | 0 | 2.916632  | 5.058247  | 0.886522  |
| 42 | 1  | 0 | 3.161371  | 4.897442  | -0.846052 |
| 43 | 6  | 0 | 4.963055  | 4.638561  | 0.323005  |
| 44 | 1  | 0 | 5.259945  | 5.692036  | 0.266706  |
| 45 | 1  | 0 | 5.279209  | 4.254475  | 1.300597  |
| 46 | 1  | 0 | 5.524891  | 4.091655  | -0.443877 |

-----  
Zero-point correction= 0.400337 (Hartree/Particle)  
Thermal correction to Energy= 0.425748  
Thermal correction to Enthalpy= 0.426693  
Thermal correction to Gibbs Free Energy= 0.338145  
Sum of electronic and zero-point Energies= -1574.049216  
Sum of electronic and thermal Energies= -1574.023804  
Sum of electronic and thermal Enthalpies= -1574.022860  
Sum of electronic and thermal Free Energies= -1574.111407  
M06/6-311++G(d,p)-SDD/SMD//B3LYP/6-31G(d)-LANL2DZ energy in dichloromethane solvent = -1735.758875

#### INT15'

-----

| Center<br>Number | Atomic<br>Number | Atomic<br>Type | Coordinates (Angstroms) |           |           |
|------------------|------------------|----------------|-------------------------|-----------|-----------|
|                  |                  |                | X                       | Y         | Z         |
| 1                | 6                | 0              | -0.210038               | -0.706966 | 0.151475  |
| 2                | 6                | 0              | -1.461509               | -0.876908 | -0.425618 |
| 3                | 6                | 0              | 0.593969                | 0.437875  | 0.049159  |
| 4                | 1                | 0              | 0.173190                | -1.520629 | 0.769259  |
| 5                | 1                | 0              | -1.804087               | -0.052319 | -1.059942 |
| 6                | 30               | 0              | -2.600626               | -2.636174 | -0.060635 |
| 7                | 17               | 0              | -1.287478               | -4.061536 | 1.116755  |
| 8                | 17               | 0              | -4.710714               | -2.745412 | -0.805666 |
| 9                | 6                | 0              | 0.212114                | 1.668422  | -0.703249 |
| 10               | 1                | 0              | -0.464616               | 1.443420  | -1.531806 |
| 11               | 1                | 0              | 1.117496                | 2.128061  | -1.119372 |
| 12               | 6                | 0              | -0.475233               | 2.702174  | 0.239282  |

|    |   |   |           |           |           |
|----|---|---|-----------|-----------|-----------|
| 13 | 1 | 0 | -1.395251 | 2.255619  | 0.635913  |
| 14 | 1 | 0 | 0.173276  | 2.905788  | 1.101258  |
| 15 | 6 | 0 | -0.796728 | 4.013862  | -0.489029 |
| 16 | 1 | 0 | 0.132617  | 4.448692  | -0.884086 |
| 17 | 1 | 0 | -1.432088 | 3.799403  | -1.359910 |
| 18 | 6 | 0 | -1.497487 | 5.037162  | 0.415264  |
| 19 | 1 | 0 | -0.862049 | 5.248689  | 1.287852  |
| 20 | 1 | 0 | -2.424667 | 4.598319  | 0.811208  |
| 21 | 6 | 0 | -1.826187 | 6.353054  | -0.303577 |
| 22 | 1 | 0 | -0.899059 | 6.790090  | -0.700776 |
| 23 | 1 | 0 | -2.461175 | 6.139981  | -1.174875 |
| 24 | 6 | 0 | -2.525612 | 7.371721  | 0.602451  |
| 25 | 1 | 0 | -1.900225 | 7.630813  | 1.465571  |
| 26 | 1 | 0 | -2.746927 | 8.298329  | 0.061371  |
| 27 | 1 | 0 | -3.473402 | 6.975696  | 0.986731  |
| 28 | 6 | 0 | 1.917263  | 0.445080  | 0.739358  |
| 29 | 1 | 0 | 1.878341  | -0.165254 | 1.648153  |
| 30 | 1 | 0 | 2.207100  | 1.466026  | 1.013998  |
| 31 | 6 | 0 | 3.010096  | -0.146933 | -0.205781 |
| 32 | 1 | 0 | 2.728941  | -1.171900 | -0.475473 |
| 33 | 1 | 0 | 3.038947  | 0.431169  | -1.138719 |
| 34 | 6 | 0 | 4.395506  | -0.139030 | 0.454964  |
| 35 | 1 | 0 | 4.351716  | -0.708553 | 1.393702  |
| 36 | 1 | 0 | 4.663189  | 0.891389  | 0.729397  |
| 37 | 6 | 0 | 5.485166  | -0.728496 | -0.451139 |
| 38 | 1 | 0 | 5.212469  | -1.757575 | -0.725867 |
| 39 | 1 | 0 | 5.524875  | -0.160316 | -1.392187 |
| 40 | 6 | 0 | 6.875438  | -0.728919 | 0.199871  |
| 41 | 1 | 0 | 6.833892  | -1.296731 | 1.139840  |
| 42 | 1 | 0 | 7.146423  | 0.299979  | 0.476071  |
| 43 | 6 | 0 | 7.960790  | -1.318702 | -0.706756 |
| 44 | 1 | 0 | 8.939616  | -1.305485 | -0.214685 |
| 45 | 1 | 0 | 7.734622  | -2.358803 | -0.971033 |
| 46 | 1 | 0 | 8.049585  | -0.750955 | -1.641118 |

-----  
Zero-point correction= 0.403256 (Hartree/Particle)  
Thermal correction to Energy= 0.428853  
Thermal correction to Enthalpy= 0.429797  
Thermal correction to Gibbs Free Energy= 0.339338  
Sum of electronic and zero-point Energies= -1574.075728  
Sum of electronic and thermal Energies= -1574.050131  
Sum of electronic and thermal Enthalpies= -1574.049187  
Sum of electronic and thermal Free Energies= -1574.139646  
M06/6-311++G(d,p)-SDD/SMD//B3LYP/6-31G(d)-LANL2DZ energy in dichloromethane solvent = -1735.785887

#### INT16

-----

| Center<br>Number | Atomic<br>Number | Atomic<br>Type | Coordinates (Angstroms) |           |           |
|------------------|------------------|----------------|-------------------------|-----------|-----------|
|                  |                  |                | X                       | Y         | Z         |
| 1                | 6                | 0              | 1.484403                | -1.125994 | -1.462339 |
| 2                | 6                | 0              | 0.117233                | -1.198404 | -1.221050 |
| 3                | 6                | 0              | 2.362246                | -0.217492 | -0.851848 |
| 4                | 1                | 0              | 1.953410                | -1.803392 | -2.181795 |
| 5                | 1                | 0              | -0.335923               | -1.990747 | -1.833033 |
| 6                | 30               | 0              | -1.370628               | -0.134831 | -0.135206 |
| 7                | 17               | 0              | -2.121516               | 1.668648  | -1.352597 |
| 8                | 17               | 0              | -1.050764               | 0.005493  | 2.173392  |
| 9                | 6                | 0              | 1.963784                | 0.828286  | 0.122941  |
| 10               | 1                | 0              | 1.108759                | 0.520471  | 0.730245  |
| 11               | 1                | 0              | 2.804882                | 1.027151  | 0.799456  |
| 12               | 6                | 0              | 3.816087                | -0.299034 | -1.196461 |
| 13               | 1                | 0              | 3.953740                | -0.693021 | -2.209877 |
| 14               | 1                | 0              | 4.268498                | 0.698734  | -1.147954 |
| 15               | 6                | 0              | 4.559421                | -1.229535 | -0.192956 |
| 16               | 1                | 0              | 4.119773                | -2.233532 | -0.244377 |
| 17               | 1                | 0              | 4.395328                | -0.867287 | 0.829798  |

|    |   |   |           |           |           |
|----|---|---|-----------|-----------|-----------|
| 18 | 6 | 0 | 6.064553  | -1.301088 | -0.483815 |
| 19 | 1 | 0 | 6.492817  | -0.289832 | -0.432684 |
| 20 | 1 | 0 | 6.220262  | -1.649668 | -1.514868 |
| 21 | 6 | 0 | 6.814432  | -2.223845 | 0.486528  |
| 22 | 1 | 0 | 6.383425  | -3.234442 | 0.434944  |
| 23 | 1 | 0 | 6.653888  | -1.876203 | 1.517505  |
| 24 | 6 | 0 | 8.321648  | -2.300869 | 0.206579  |
| 25 | 1 | 0 | 8.751341  | -1.290511 | 0.258671  |
| 26 | 1 | 0 | 8.481078  | -2.647101 | -0.824449 |
| 27 | 6 | 0 | 9.065906  | -3.223908 | 1.177154  |
| 28 | 1 | 0 | 8.681599  | -4.249850 | 1.122538  |
| 29 | 1 | 0 | 10.137773 | -3.257332 | 0.952042  |
| 30 | 1 | 0 | 8.953389  | -2.883190 | 2.213668  |
| 31 | 6 | 0 | 1.612656  | 2.161706  | -0.615970 |
| 32 | 1 | 0 | 0.748213  | 1.989169  | -1.265576 |
| 33 | 1 | 0 | 2.452732  | 2.463937  | -1.256702 |
| 34 | 6 | 0 | 1.286559  | 3.277642  | 0.385241  |
| 35 | 1 | 0 | 2.161986  | 3.468376  | 1.023998  |
| 36 | 1 | 0 | 0.480789  | 2.936985  | 1.047831  |
| 37 | 6 | 0 | 0.857844  | 4.575247  | -0.312871 |
| 38 | 1 | 0 | -0.024870 | 4.368489  | -0.932538 |
| 39 | 1 | 0 | 1.653077  | 4.906402  | -0.998594 |
| 40 | 6 | 0 | 0.534907  | 5.707595  | 0.671625  |
| 41 | 1 | 0 | 1.415347  | 5.908554  | 1.299367  |
| 42 | 1 | 0 | -0.258282 | 5.373545  | 1.354289  |
| 43 | 6 | 0 | 0.097750  | 7.000333  | -0.025562 |
| 44 | 1 | 0 | -0.128714 | 7.789403  | 0.700976  |
| 45 | 1 | 0 | 0.883116  | 7.377194  | -0.693051 |
| 46 | 1 | 0 | -0.801262 | 6.836319  | -0.631794 |
| 47 | 6 | 0 | -4.221491 | -1.245493 | 1.678252  |
| 48 | 6 | 0 | -4.071369 | -1.628757 | 0.299789  |
| 49 | 8 | 0 | -3.010185 | -1.509343 | -0.330954 |
| 50 | 7 | 0 | -5.383656 | -1.373155 | 2.271140  |
| 51 | 7 | 0 | -6.382355 | -1.482670 | 2.799403  |
| 52 | 8 | 0 | -5.175053 | -2.142581 | -0.252571 |
| 53 | 6 | 0 | -5.110073 | -2.478278 | -1.664725 |
| 54 | 1 | 0 | -4.776226 | -1.594596 | -2.215313 |
| 55 | 1 | 0 | -4.363679 | -3.267377 | -1.798347 |
| 56 | 1 | 0 | -3.395207 | -0.821457 | 2.244092  |
| 57 | 6 | 0 | -6.497092 | -2.927852 | -2.081733 |
| 58 | 1 | 0 | -6.490586 | -3.194999 | -3.143897 |
| 59 | 1 | 0 | -6.816624 | -3.803358 | -1.507578 |
| 60 | 1 | 0 | -7.228677 | -2.127704 | -1.932603 |

-----  
Zero-point correction= 0.510383 (Hartree/Particle)  
Thermal correction to Energy= 0.545983  
Thermal correction to Enthalpy= 0.546927  
Thermal correction to Gibbs Free Energy= 0.432518  
Sum of electronic and zero-point Energies= -1989.937971  
Sum of electronic and thermal Energies= -1989.902371  
Sum of electronic and thermal Enthalpies= -1989.901427  
Sum of electronic and thermal Free Energies= -1990.015836  
M06/6-311++G(d,p)-SDD/SMD//B3LYP/6-31G(d)-LANL2DZ energy in dichloromethane solvent = -2151.616909

#### TS9

-----

| Center<br>Number | Atomic<br>Number | Atomic<br>Type | Coordinates (Angstroms) |           |           |
|------------------|------------------|----------------|-------------------------|-----------|-----------|
|                  |                  |                | X                       | Y         | Z         |
| 1                | 6                | 0              | -0.433028               | -0.745549 | 1.531762  |
| 2                | 6                | 0              | 0.699713                | -1.589262 | 1.333189  |
| 3                | 6                | 0              | -0.656769               | 0.454242  | 0.891555  |
| 4                | 1                | 0              | -1.154126               | -1.008750 | 2.309832  |
| 5                | 1                | 0              | 0.754072                | -2.342495 | 2.125420  |
| 6                | 30               | 0              | 2.621824                | -1.041055 | 0.629335  |
| 7                | 17               | 0              | 3.259214                | -1.134094 | -1.537044 |
| 8                | 17               | 0              | 3.857376                | -0.418344 | 2.419157  |

|    |   |   |           |           |           |
|----|---|---|-----------|-----------|-----------|
| 9  | 6 | 0 | 0.179827  | 0.993575  | -0.232687 |
| 10 | 1 | 0 | 0.694805  | 0.193820  | -0.772626 |
| 11 | 1 | 0 | -0.486604 | 1.478961  | -0.958808 |
| 12 | 6 | 0 | -1.809658 | 1.315143  | 1.339690  |
| 13 | 1 | 0 | -2.054128 | 1.103644  | 2.387230  |
| 14 | 1 | 0 | -1.519923 | 2.371692  | 1.277632  |
| 15 | 6 | 0 | -3.080268 | 1.104009  | 0.479242  |
| 16 | 1 | 0 | -3.401629 | 0.058889  | 0.576305  |
| 17 | 1 | 0 | -2.838601 | 1.262096  | -0.580522 |
| 18 | 6 | 0 | -4.225842 | 2.039642  | 0.888510  |
| 19 | 1 | 0 | -3.892841 | 3.082891  | 0.790735  |
| 20 | 1 | 0 | -4.454411 | 1.890130  | 1.953660  |
| 21 | 6 | 0 | -5.500405 | 1.832339  | 0.059554  |
| 22 | 1 | 0 | -5.834351 | 0.788469  | 0.158887  |
| 23 | 1 | 0 | -5.269906 | 1.978769  | -1.006159 |
| 24 | 6 | 0 | -6.647485 | 2.769311  | 0.461943  |
| 25 | 1 | 0 | -6.313846 | 3.811732  | 0.362000  |
| 26 | 1 | 0 | -6.876565 | 2.623781  | 1.527085  |
| 27 | 6 | 0 | -7.917694 | 2.557205  | -0.368357 |
| 28 | 1 | 0 | -8.295983 | 1.533028  | -0.260815 |
| 29 | 1 | 0 | -8.715753 | 3.240628  | -0.057507 |
| 30 | 1 | 0 | -7.728088 | 2.729882  | -1.434913 |
| 31 | 6 | 0 | 1.209503  | 2.053391  | 0.249039  |
| 32 | 1 | 0 | 1.905396  | 1.594280  | 0.965393  |
| 33 | 1 | 0 | 0.691685  | 2.846054  | 0.805817  |
| 34 | 6 | 0 | 1.994399  | 2.667537  | -0.918167 |
| 35 | 1 | 0 | 1.289933  | 3.144348  | -1.616121 |
| 36 | 1 | 0 | 2.494095  | 1.865779  | -1.477464 |
| 37 | 6 | 0 | 3.035037  | 3.695869  | -0.455225 |
| 38 | 1 | 0 | 3.734546  | 3.213173  | 0.241878  |
| 39 | 1 | 0 | 2.535803  | 4.494835  | 0.114202  |
| 40 | 6 | 0 | 3.825190  | 4.317614  | -1.614711 |
| 41 | 1 | 0 | 3.126039  | 4.797457  | -2.314946 |
| 42 | 1 | 0 | 4.322982  | 3.517693  | -2.179560 |
| 43 | 6 | 0 | 4.867019  | 5.340862  | -1.150338 |
| 44 | 1 | 0 | 5.415190  | 5.765853  | -1.999075 |
| 45 | 1 | 0 | 4.395588  | 6.170603  | -0.608576 |
| 46 | 1 | 0 | 5.599986  | 4.880258  | -0.476971 |
| 47 | 6 | 0 | -0.091840 | -3.356703 | 0.047224  |
| 48 | 6 | 0 | -1.076298 | -2.817969 | -0.925670 |
| 49 | 8 | 0 | -0.812743 | -2.415183 | -2.036595 |
| 50 | 7 | 0 | 1.037931  | -3.822211 | -0.497800 |
| 51 | 7 | 0 | 2.032058  | -4.136654 | -0.923952 |
| 52 | 8 | 0 | -2.302948 | -2.850128 | -0.371788 |
| 53 | 6 | 0 | -3.389874 | -2.430154 | -1.239543 |
| 54 | 1 | 0 | -3.258966 | -1.369942 | -1.473901 |
| 55 | 1 | 0 | -3.320189 | -2.990935 | -2.176002 |
| 56 | 1 | 0 | -0.440511 | -3.956375 | 0.879714  |
| 57 | 6 | 0 | -4.688164 | -2.701978 | -0.504721 |
| 58 | 1 | 0 | -5.534228 | -2.397334 | -1.129995 |
| 59 | 1 | 0 | -4.794257 | -3.767430 | -0.277512 |
| 60 | 1 | 0 | -4.736526 | -2.142583 | 0.435290  |

-----  
Zero-point correction= 0.510210 (Hartree/Particle)  
Thermal correction to Energy= 0.545048  
Thermal correction to Enthalpy= 0.545992  
Thermal correction to Gibbs Free Energy= 0.434276  
Sum of electronic and zero-point Energies= -1989.904569  
Sum of electronic and thermal Energies= -1989.869731  
Sum of electronic and thermal Enthalpies= -1989.868787  
Sum of electronic and thermal Free Energies= -1989.980503  
M06/6-311++G(d,p)-SDD/SMD//B3LYP/6-31G(d)-LANL2DZ energy in dichloromethane solvent = -2151.610504

#### INTI7

-----  
Center Atomic Atomic Coordinates (Angstroms)  
Number Number Type X Y Z

|    |    |   |           |           |           |
|----|----|---|-----------|-----------|-----------|
| 1  | 6  | 0 | 0.108152  | 0.702552  | -1.792743 |
| 2  | 6  | 0 | 0.859639  | 1.972516  | -1.910098 |
| 3  | 6  | 0 | -0.148445 | -0.044141 | -0.673297 |
| 4  | 1  | 0 | -0.397372 | 0.403007  | -2.716475 |
| 5  | 1  | 0 | 1.643624  | 1.986846  | -2.667197 |
| 6  | 30 | 0 | 1.828861  | -1.024147 | -2.133994 |
| 7  | 17 | 0 | 3.756604  | -0.200159 | -1.414027 |
| 8  | 17 | 0 | 0.996631  | -2.627421 | -3.413671 |
| 9  | 6  | 0 | 0.469054  | 0.263347  | 0.670919  |
| 10 | 1  | 0 | 1.270106  | 0.998326  | 0.543195  |
| 11 | 1  | 0 | -0.306117 | 0.756904  | 1.272518  |
| 12 | 6  | 0 | -1.158342 | -1.170279 | -0.758748 |
| 13 | 1  | 0 | -1.390266 | -1.381343 | -1.808191 |
| 14 | 1  | 0 | -0.748534 | -2.096749 | -0.338289 |
| 15 | 6  | 0 | -2.464017 | -0.816763 | -0.006913 |
| 16 | 1  | 0 | -2.831268 | 0.153663  | -0.363416 |
| 17 | 1  | 0 | -2.252544 | -0.690098 | 1.062958  |
| 18 | 6  | 0 | -3.543315 | -1.891972 | -0.189519 |
| 19 | 1  | 0 | -3.155235 | -2.861817 | 0.154875  |
| 20 | 1  | 0 | -3.758026 | -2.013558 | -1.261050 |
| 21 | 6  | 0 | -4.844726 | -1.569773 | 0.556999  |
| 22 | 1  | 0 | -5.229107 | -0.597617 | 0.214557  |
| 23 | 1  | 0 | -4.629805 | -1.450448 | 1.629440  |
| 24 | 6  | 0 | -5.932242 | -2.637117 | 0.374951  |
| 25 | 1  | 0 | -5.547276 | -3.608235 | 0.717131  |
| 26 | 1  | 0 | -6.146660 | -2.755886 | -0.696564 |
| 27 | 6  | 0 | -7.229150 | -2.309276 | 1.122406  |
| 28 | 1  | 0 | -7.656784 | -1.359933 | 0.776841  |
| 29 | 1  | 0 | -7.984732 | -3.088858 | 0.972631  |
| 30 | 1  | 0 | -7.053085 | -2.218848 | 2.201498  |
| 31 | 6  | 0 | 1.016995  | -0.956515 | 1.437339  |
| 32 | 1  | 0 | 1.730631  | -1.504932 | 0.803974  |
| 33 | 1  | 0 | 0.204714  | -1.656322 | 1.672184  |
| 34 | 6  | 0 | 1.726848  | -0.550066 | 2.735453  |
| 35 | 1  | 0 | 1.027760  | 0.019177  | 3.366318  |
| 36 | 1  | 0 | 2.552430  | 0.133983  | 2.494106  |
| 37 | 6  | 0 | 2.271819  | -1.745612 | 3.527219  |
| 38 | 1  | 0 | 2.967337  | -2.313866 | 2.892473  |
| 39 | 1  | 0 | 1.446202  | -2.432475 | 3.766955  |
| 40 | 6  | 0 | 2.986426  | -1.342218 | 4.823933  |
| 41 | 1  | 0 | 2.292285  | -0.771999 | 5.457930  |
| 42 | 1  | 0 | 3.811668  | -0.657432 | 4.583031  |
| 43 | 6  | 0 | 3.529625  | -2.540249 | 5.609859  |
| 44 | 1  | 0 | 4.033929  | -2.220019 | 6.528714  |
| 45 | 1  | 0 | 2.722716  | -3.226955 | 5.894476  |
| 46 | 1  | 0 | 4.253197  | -3.109612 | 5.013675  |
| 47 | 6  | 0 | 0.644578  | 3.140210  | -1.276648 |
| 48 | 6  | 0 | -0.442214 | 3.437262  | -0.312011 |
| 49 | 8  | 0 | -1.309278 | 2.675239  | 0.077828  |
| 50 | 8  | 0 | -0.359427 | 4.727606  | 0.078400  |
| 51 | 6  | 0 | -1.373377 | 5.178219  | 1.005716  |
| 52 | 1  | 0 | -2.356901 | 5.034143  | 0.546745  |
| 53 | 1  | 0 | -1.332254 | 4.550819  | 1.902108  |
| 54 | 1  | 0 | 1.277026  | 3.987853  | -1.522204 |
| 55 | 6  | 0 | -1.093491 | 6.636975  | 1.314621  |
| 56 | 1  | 0 | -1.843064 | 7.016779  | 2.017276  |
| 57 | 1  | 0 | -0.104100 | 6.758678  | 1.766897  |
| 58 | 1  | 0 | -1.134585 | 7.244751  | 0.405119  |

-----

|                                            |                             |
|--------------------------------------------|-----------------------------|
| Zero-point correction=                     | 0.504061 (Hartree/Particle) |
| Thermal correction to Energy=              | 0.536782                    |
| Thermal correction to Enthalpy=            | 0.537726                    |
| Thermal correction to Gibbs Free Energy=   | 0.430933                    |
| Sum of electronic and zero-point Energies= | -1880.529314                |
| Sum of electronic and thermal Energies=    | -1880.496593                |
| Sum of electronic and thermal Enthalpies=  | -1880.495649                |

Sum of electronic and thermal Free Energies= -1880.602443  
M06/6-311++G(d,p)-SDD/SMD//B3LYP/6-31G(d)-LANL2DZ energy in dichloromethane solvent = -2042.246407

Z-P2

| Center Number | Atomic Number | Atomic Type | Coordinates (Angstroms) |           |           |
|---------------|---------------|-------------|-------------------------|-----------|-----------|
|               |               |             | X                       | Y         | Z         |
| 1             | 6             | 0           | -1.039771               | 0.098994  | -0.015590 |
| 2             | 6             | 0           | -1.924312               | -0.811930 | -0.709485 |
| 3             | 6             | 0           | 0.314822                | 0.034219  | -0.023297 |
| 4             | 1             | 0           | -1.522731               | 0.886894  | 0.553682  |
| 5             | 1             | 0           | -1.455747               | -1.600887 | -1.295362 |
| 6             | 6             | 0           | 1.118293                | -1.034202 | -0.734229 |
| 7             | 1             | 0           | 0.599283                | -1.394019 | -1.629960 |
| 8             | 1             | 0           | 2.063218                | -0.598397 | -1.086453 |
| 9             | 6             | 0           | 1.116002                | 1.073461  | 0.730111  |
| 10            | 1             | 0           | 0.490884                | 1.534935  | 1.504027  |
| 11            | 1             | 0           | 1.956596                | 0.588366  | 1.248405  |
| 12            | 6             | 0           | 1.677475                | 2.185161  | -0.183949 |
| 13            | 1             | 0           | 0.837622                | 2.692852  | -0.676896 |
| 14            | 1             | 0           | 2.279935                | 1.737455  | -0.986925 |
| 15            | 6             | 0           | 2.528228                | 3.210643  | 0.576403  |
| 16            | 1             | 0           | 3.366471                | 2.694990  | 1.068441  |
| 17            | 1             | 0           | 1.927022                | 3.652545  | 1.384581  |
| 18            | 6             | 0           | 3.075769                | 4.330057  | -0.318304 |
| 19            | 1             | 0           | 2.237227                | 4.844677  | -0.810513 |
| 20            | 1             | 0           | 3.677133                | 3.888663  | -1.127243 |
| 21            | 6             | 0           | 3.925612                | 5.359111  | 0.438521  |
| 22            | 1             | 0           | 4.763722                | 4.844983  | 0.930397  |
| 23            | 1             | 0           | 3.324509                | 5.800595  | 1.246099  |
| 24            | 6             | 0           | 4.468142                | 6.473744  | -0.461797 |
| 25            | 1             | 0           | 3.652093                | 7.028912  | -0.940626 |
| 26            | 1             | 0           | 5.069728                | 7.191541  | 0.107524  |
| 27            | 1             | 0           | 5.102061                | 6.066285  | -1.259105 |
| 28            | 6             | 0           | 1.442639                | -2.240671 | 0.174929  |
| 29            | 1             | 0           | 0.501210                | -2.704563 | 0.498722  |
| 30            | 1             | 0           | 1.937863                | -1.886997 | 1.089996  |
| 31            | 6             | 0           | 2.328386                | -3.287488 | -0.512365 |
| 32            | 1             | 0           | 3.269001                | -2.814632 | -0.831862 |
| 33            | 1             | 0           | 1.835101                | -3.633217 | -1.433110 |
| 34            | 6             | 0           | 2.645043                | -4.496581 | 0.377260  |
| 35            | 1             | 0           | 1.704435                | -4.968874 | 0.697488  |
| 36            | 1             | 0           | 3.139179                | -4.151526 | 1.297758  |
| 37            | 6             | 0           | 3.529750                | -5.546158 | -0.307991 |
| 38            | 1             | 0           | 4.469732                | -5.074101 | -0.627703 |
| 39            | 1             | 0           | 3.035570                | -5.891217 | -1.227394 |
| 40            | 6             | 0           | 3.841665                | -6.750257 | 0.586531  |
| 41            | 1             | 0           | 4.474047                | -7.480576 | 0.068928  |
| 42            | 1             | 0           | 4.367624                | -6.441180 | 1.498284  |
| 43            | 1             | 0           | 2.922627                | -7.264209 | 0.894167  |
| 44            | 6             | 0           | -3.280032               | -0.804226 | -0.716659 |
| 45            | 6             | 0           | -4.139386               | 0.154071  | -0.001072 |
| 46            | 8             | 0           | -3.789806               | 1.084432  | 0.706610  |
| 47            | 8             | 0           | -5.448669               | -0.133932 | -0.234348 |
| 48            | 6             | 0           | -6.404757               | 0.731848  | 0.408619  |
| 49            | 1             | 0           | -6.244004               | 0.698436  | 1.491588  |
| 50            | 1             | 0           | -6.226491               | 1.762797  | 0.084354  |
| 51            | 1             | 0           | -3.811777               | -1.556382 | -1.290718 |
| 52            | 6             | 0           | -7.790712               | 0.246934  | 0.024511  |
| 53            | 1             | 0           | -8.551282               | 0.880393  | 0.494191  |
| 54            | 1             | 0           | -7.931752               | 0.285848  | -1.060522 |
| 55            | 1             | 0           | -7.949448               | -0.784778 | 0.354771  |

Zero-point correction= 0.501188 (Hartree/Particle)  
Thermal correction to Energy= 0.527721  
Thermal correction to Enthalpy= 0.528665

Thermal correction to Gibbs Free Energy= 0.438696  
 Sum of electronic and zero-point Energies= -894.463234  
 Sum of electronic and thermal Energies= -894.436701  
 Sum of electronic and thermal Enthalpies= -894.435757  
 Sum of electronic and thermal Free Energies= -894.525726  
 M06/6-311++G(d,p)-SDD/SMD//B3LYP/6-31G(d)-LANL2DZ energy in dichloromethane solvent = -894.539735

TS9'

| Center<br>Number | Atomic<br>Number | Atomic<br>Type | Coordinates (Angstroms) |           |           |
|------------------|------------------|----------------|-------------------------|-----------|-----------|
|                  |                  |                | X                       | Y         | Z         |
| 1                | 6                | 0              | -0.626801               | -0.718779 | 1.255692  |
| 2                | 6                | 0              | 0.761350                | -0.825327 | 0.943482  |
| 3                | 6                | 0              | -1.492980               | 0.242945  | 0.780695  |
| 4                | 1                | 0              | -1.052655               | -1.407454 | 1.991500  |
| 5                | 1                | 0              | 1.238412                | -1.505482 | 1.661785  |
| 6                | 30               | 0              | 2.271383                | 0.322840  | -0.093530 |
| 7                | 17               | 0              | 3.475522                | 1.773909  | 1.146525  |
| 8                | 17               | 0              | 1.755192                | 0.457379  | -2.366552 |
| 9                | 6                | 0              | -1.114496               | 1.336766  | -0.169871 |
| 10               | 1                | 0              | -0.346462               | 1.010781  | -0.876445 |
| 11               | 1                | 0              | -1.997538               | 1.622065  | -0.756750 |
| 12               | 6                | 0              | -2.919012               | 0.238612  | 1.262637  |
| 13               | 1                | 0              | -2.993984               | -0.255742 | 2.238359  |
| 14               | 1                | 0              | -3.267715               | 1.272278  | 1.386068  |
| 15               | 6                | 0              | -3.857528               | -0.484363 | 0.261987  |
| 16               | 1                | 0              | -3.526689               | -1.526269 | 0.155511  |
| 17               | 1                | 0              | -3.761861               | -0.024077 | -0.730350 |
| 18               | 6                | 0              | -5.326101               | -0.448392 | 0.705457  |
| 19               | 1                | 0              | -5.647208               | 0.598001  | 0.810494  |
| 20               | 1                | 0              | -5.415385               | -0.897794 | 1.705182  |
| 21               | 6                | 0              | -6.265965               | -1.175030 | -0.265857 |
| 22               | 1                | 0              | -5.943014               | -2.221428 | -0.371153 |
| 23               | 1                | 0              | -6.174205               | -0.726105 | -1.265895 |
| 24               | 6                | 0              | -7.736906               | -1.141241 | 0.170798  |
| 25               | 1                | 0              | -8.059025               | -0.095551 | 0.275547  |
| 26               | 1                | 0              | -7.827942               | -1.589322 | 1.170468  |
| 27               | 6                | 0              | -8.670421               | -1.868564 | -0.802617 |
| 28               | 1                | 0              | -8.394636               | -2.925707 | -0.901817 |
| 29               | 1                | 0              | -9.711585               | -1.826586 | -0.463436 |
| 30               | 1                | 0              | -8.627540               | -1.420400 | -1.802911 |
| 31               | 6                | 0              | -0.603133               | 2.597138  | 0.584340  |
| 32               | 1                | 0              | 0.305349                | 2.335023  | 1.140590  |
| 33               | 1                | 0              | -1.346634               | 2.913144  | 1.329755  |
| 34               | 6                | 0              | -0.303410               | 3.755919  | -0.375530 |
| 35               | 1                | 0              | -1.226311               | 4.043194  | -0.901533 |
| 36               | 1                | 0              | 0.398700                | 3.411182  | -1.146430 |
| 37               | 6                | 0              | 0.286033                | 4.978301  | 0.340717  |
| 38               | 1                | 0              | 1.212546                | 4.680839  | 0.851002  |
| 39               | 1                | 0              | -0.407788               | 5.314418  | 1.126682  |
| 40               | 6                | 0              | 0.582333                | 6.148501  | -0.606891 |
| 41               | 1                | 0              | -0.343153               | 6.443317  | -1.122834 |
| 42               | 1                | 0              | 1.274525                | 5.809815  | -1.390000 |
| 43               | 6                | 0              | 1.178371                | 7.364797  | 0.109753  |
| 44               | 1                | 0              | 1.381457                | 8.182398  | -0.591681 |
| 45               | 1                | 0              | 0.495170                | 7.747192  | 0.878753  |
| 46               | 1                | 0              | 2.122549                | 7.107084  | 0.604516  |
| 47               | 6                | 0              | 1.076551                | -2.332981 | -0.662423 |
| 48               | 6                | 0              | 2.482639                | -2.640439 | -0.327041 |
| 49               | 8                | 0              | 3.319177                | -1.746941 | -0.272364 |
| 50               | 7                | 0              | 0.160026                | -3.285928 | -0.524448 |
| 51               | 7                | 0              | -0.701598               | -3.990530 | -0.318587 |
| 52               | 8                | 0              | 2.716609                | -3.919268 | -0.048939 |
| 53               | 6                | 0              | 4.076996                | -4.256304 | 0.369585  |
| 54               | 1                | 0              | 4.755756                | -3.980973 | -0.441713 |
| 55               | 1                | 0              | 4.324207                | -3.647848 | 1.243751  |

|    |   |   |          |           |           |
|----|---|---|----------|-----------|-----------|
| 56 | 1 | 0 | 0.895080 | -1.620307 | -1.474407 |
| 57 | 6 | 0 | 4.099658 | -5.741710 | 0.667035  |
| 58 | 1 | 0 | 5.107851 | -6.032050 | 0.980621  |
| 59 | 1 | 0 | 3.403519 | -5.993843 | 1.473142  |
| 60 | 1 | 0 | 3.834246 | -6.325086 | -0.220046 |

-----  
Zero-point correction= 0.510670 (Hartree/Particle)  
Thermal correction to Energy= 0.545056  
Thermal correction to Enthalpy= 0.546000  
Thermal correction to Gibbs Free Energy= 0.436760  
Sum of electronic and zero-point Energies= -1989.921667  
Sum of electronic and thermal Energies= -1989.887282  
Sum of electronic and thermal Enthalpies= -1989.886337  
Sum of electronic and thermal Free Energies= -1989.995578  
M06/6-311++G(d,p)-SDD/SMD//B3LYP/6-31G(d)-LANL2DZ energy in dichloromethane solvent = -2151.607069

**INT17'**

-----

| Center<br>Number | Atomic<br>Number | Atomic<br>Type | Coordinates (Angstroms) |           |           |
|------------------|------------------|----------------|-------------------------|-----------|-----------|
|                  |                  |                | X                       | Y         | Z         |
| 1                | 6                | 0              | 0.979760                | -0.919967 | -0.582087 |
| 2                | 6                | 0              | -0.375231               | -0.694345 | -0.124790 |
| 3                | 6                | 0              | 2.104809                | -0.176360 | -0.411371 |
| 4                | 1                | 0              | 1.104503                | -1.873788 | -1.093356 |
| 5                | 1                | 0              | -0.988015               | -1.595717 | -0.107128 |
| 6                | 30               | 0              | -4.115477               | -2.032171 | -0.237756 |
| 7                | 17               | 0              | -2.751013               | -3.720920 | -0.702770 |
| 8                | 17               | 0              | -6.192821               | -1.333445 | -0.570710 |
| 9                | 6                | 0              | 2.173060                | 1.142626  | 0.317949  |
| 10               | 1                | 0              | 1.400768                | 1.199039  | 1.093159  |
| 11               | 1                | 0              | 3.139997                | 1.213558  | 0.833859  |
| 12               | 6                | 0              | 3.418596                | -0.705021 | -0.943442 |
| 13               | 1                | 0              | 3.234285                | -1.408576 | -1.764234 |
| 14               | 1                | 0              | 4.003304                | 0.127126  | -1.361266 |
| 15               | 6                | 0              | 4.268065                | -1.411725 | 0.138067  |
| 16               | 1                | 0              | 3.698497                | -2.263400 | 0.533194  |
| 17               | 1                | 0              | 4.432005                | -0.731170 | 0.985068  |
| 18               | 6                | 0              | 5.623049                | -1.895878 | -0.394849 |
| 19               | 1                | 0              | 6.186777                | -1.037251 | -0.788872 |
| 20               | 1                | 0              | 5.457746                | -2.569370 | -1.248524 |
| 21               | 6                | 0              | 6.468173                | -2.616426 | 0.663966  |
| 22               | 1                | 0              | 5.903718                | -3.474773 | 1.057231  |
| 23               | 1                | 0              | 6.632331                | -1.943500 | 1.518887  |
| 24               | 6                | 0              | 7.824528                | -3.102482 | 0.135639  |
| 25               | 1                | 0              | 8.388502                | -2.244465 | -0.257270 |
| 26               | 1                | 0              | 7.659957                | -3.774851 | -0.718274 |
| 27               | 6                | 0              | 8.662561                | -3.821671 | 1.197979  |
| 28               | 1                | 0              | 8.139269                | -4.704880 | 1.584565  |
| 29               | 1                | 0              | 9.623307                | -4.155973 | 0.790230  |
| 30               | 1                | 0              | 8.873102                | -3.163232 | 2.049860  |
| 31               | 6                | 0              | 2.044455                | 2.359037  | -0.629828 |
| 32               | 1                | 0              | 1.085344                | 2.309367  | -1.162657 |
| 33               | 1                | 0              | 2.822086                | 2.298685  | -1.403436 |
| 34               | 6                | 0              | 2.159587                | 3.700092  | 0.106962  |
| 35               | 1                | 0              | 3.120739                | 3.739478  | 0.640351  |
| 36               | 1                | 0              | 1.380376                | 3.758853  | 0.881514  |
| 37               | 6                | 0              | 2.043601                | 4.914755  | -0.823487 |
| 38               | 1                | 0              | 1.083145                | 4.873569  | -1.358406 |
| 39               | 1                | 0              | 2.824095                | 4.856332  | -1.596609 |
| 40               | 6                | 0              | 2.157120                | 6.258510  | -0.091001 |
| 41               | 1                | 0              | 3.116820                | 6.299168  | 0.443596  |
| 42               | 1                | 0              | 1.376528                | 6.316878  | 0.680872  |
| 43               | 6                | 0              | 2.041844                | 7.466438  | -1.026799 |
| 44               | 1                | 0              | 2.126600                | 8.409186  | -0.474530 |
| 45               | 1                | 0              | 2.831001                | 7.454506  | -1.788688 |
| 46               | 1                | 0              | 1.077686                | 7.472253  | -1.550029 |



|    |   |   |           |           |          |
|----|---|---|-----------|-----------|----------|
| 47 | 6 | 0 | -0.995868 | 0.457401  | 0.244466 |
| 48 | 6 | 0 | -2.383374 | 0.445064  | 0.677247 |
| 49 | 8 | 0 | -3.117779 | -0.561738 | 0.746947 |
| 50 | 8 | 0 | -2.832419 | 1.644158  | 1.028870 |
| 51 | 6 | 0 | -4.221837 | 1.747133  | 1.462202 |
| 52 | 1 | 0 | -4.861790 | 1.306702  | 0.693102 |
| 53 | 1 | 0 | -4.335131 | 1.156680  | 2.376377 |
| 54 | 1 | 0 | -0.525117 | 1.430948  | 0.214244 |
| 55 | 6 | 0 | -4.512332 | 3.217380  | 1.688411 |
| 56 | 1 | 0 | -5.548714 | 3.334160  | 2.022056 |
| 57 | 1 | 0 | -3.853223 | 3.637677  | 2.454662 |
| 58 | 1 | 0 | -4.382834 | 3.789391  | 0.764343 |

-----

Zero-point correction= 0.504816 (Hartree/Particle)  
Thermal correction to Energy= 0.537423  
Thermal correction to Enthalpy= 0.538367  
Thermal correction to Gibbs Free Energy= 0.430022  
Sum of electronic and zero-point Energies= -1880.556917  
Sum of electronic and thermal Energies= -1880.524310  
Sum of electronic and thermal Enthalpies= -1880.523366  
Sum of electronic and thermal Free Energies= -1880.631711  
M06/6-311++G(d,p)-SDD/SMD//B3LYP/6-31G(d)-LANL2DZ energy in dichloromethane solvent = -2042.253091

### E-P2

-----

| Center<br>Number | Atomic<br>Number | Atomic<br>Type | Coordinates (Angstroms) |           |           |
|------------------|------------------|----------------|-------------------------|-----------|-----------|
|                  |                  |                | X                       | Y         | Z         |
| 1                | 6                | 0              | -0.408102               | -1.102052 | -0.584086 |
| 2                | 6                | 0              | -1.745779               | -0.943353 | -0.059999 |
| 3                | 6                | 0              | 0.650262                | -0.289998 | -0.347478 |
| 4                | 1                | 0              | -0.254517               | -1.962427 | -1.236600 |
| 5                | 1                | 0              | -1.956610               | -0.109244 | 0.605698  |
| 6                | 6                | 0              | 0.575702                | 0.964164  | 0.496662  |
| 7                | 1                | 0              | -0.184535               | 0.868778  | 1.279629  |
| 8                | 1                | 0              | 1.533284                | 1.106821  | 1.015832  |
| 9                | 6                | 0              | 1.998126                | -0.607881 | -0.956315 |
| 10               | 1                | 0              | 1.870181                | -1.270074 | -1.821843 |
| 11               | 1                | 0              | 2.459107                | 0.317137  | -1.333013 |
| 12               | 6                | 0              | 2.974138                | -1.273466 | 0.039080  |
| 13               | 1                | 0              | 2.531749                | -2.215000 | 0.391682  |
| 14               | 1                | 0              | 3.088751                | -0.637312 | 0.927707  |
| 15               | 6                | 0              | 4.355118                | -1.546072 | -0.570919 |
| 16               | 1                | 0              | 4.790701                | -0.598749 | -0.922054 |
| 17               | 1                | 0              | 4.239441                | -2.176541 | -1.465003 |
| 18               | 6                | 0              | 5.328584                | -2.221879 | 0.403291  |
| 19               | 1                | 0              | 4.892914                | -3.169177 | 0.754240  |
| 20               | 1                | 0              | 5.444182                | -1.591975 | 1.297984  |
| 21               | 6                | 0              | 6.710879                | -2.495668 | -0.203552 |
| 22               | 1                | 0              | 7.146312                | -1.548896 | -0.553736 |
| 23               | 1                | 0              | 6.595258                | -3.125302 | -1.097272 |
| 24               | 6                | 0              | 7.677144                | -3.170889 | 0.775058  |
| 25               | 1                | 0              | 7.285225                | -4.137086 | 1.116057  |
| 26               | 1                | 0              | 8.653842                | -3.352604 | 0.312237  |
| 27               | 1                | 0              | 7.840312                | -2.548944 | 1.663889  |
| 28               | 6                | 0              | 0.275952                | 2.228206  | -0.340020 |
| 29               | 1                | 0              | -0.699615               | 2.106269  | -0.829183 |
| 30               | 1                | 0              | 1.014882                | 2.317384  | -1.148794 |
| 31               | 6                | 0              | 0.278861                | 3.513221  | 0.497513  |
| 32               | 1                | 0              | 1.258558                | 3.627700  | 0.985062  |
| 33               | 1                | 0              | -0.456092               | 3.418118  | 1.310307  |
| 34               | 6                | 0              | -0.030968               | 4.773090  | -0.321176 |
| 35               | 1                | 0              | -1.010363               | 4.657854  | -0.808603 |
| 36               | 1                | 0              | 0.703551                | 4.868463  | -1.134948 |
| 37               | 6                | 0              | -0.030423               | 6.060652  | 0.513137  |
| 38               | 1                | 0              | 0.948102                | 6.175545  | 1.001008  |
| 39               | 1                | 0              | -0.765207               | 5.965450  | 1.325114  |

|    |   |   |           |           |           |
|----|---|---|-----------|-----------|-----------|
| 40 | 6 | 0 | -0.340217 | 7.314350  | -0.311221 |
| 41 | 1 | 0 | -0.332517 | 8.215651  | 0.312325  |
| 42 | 1 | 0 | 0.397846  | 7.455922  | -1.110479 |
| 43 | 1 | 0 | -1.328066 | 7.244237  | -0.783014 |
| 44 | 6 | 0 | -2.777236 | -1.767435 | -0.342460 |
| 45 | 6 | 0 | -4.109726 | -1.529057 | 0.237644  |
| 46 | 8 | 0 | -4.411683 | -0.617171 | 0.987937  |
| 47 | 8 | 0 | -4.992857 | -2.475123 | -0.174667 |
| 48 | 6 | 0 | -6.335556 | -2.341131 | 0.333520  |
| 49 | 1 | 0 | -6.305771 | -2.365980 | 1.428114  |
| 50 | 1 | 0 | -6.731045 | -1.362817 | 0.040057  |
| 51 | 1 | 0 | -2.665396 | -2.625160 | -0.999866 |
| 52 | 6 | 0 | -7.156965 | -3.481643 | -0.239052 |
| 53 | 1 | 0 | -8.188773 | -3.417356 | 0.123670  |
| 54 | 1 | 0 | -7.173005 | -3.441176 | -1.333048 |
| 55 | 1 | 0 | -6.745142 | -4.450116 | 0.062909  |

-----  
Zero-point correction= 0.500899 (Hartree/Particle)  
Thermal correction to Energy= 0.527548  
Thermal correction to Enthalpy= 0.528492  
Thermal correction to Gibbs Free Energy= 0.438274  
Sum of electronic and zero-point Energies= -894.466518  
Sum of electronic and thermal Energies= -894.439870  
Sum of electronic and thermal Enthalpies= -894.438926  
Sum of electronic and thermal Free Energies= -894.529144  
M06/6-311++G(d,p)-SDD/SMD//B3LYP/6-31G(d)-LANL2DZ energy in dichloromethane solvent = -894.543558

#### TS10

| Center<br>Number | Atomic<br>Number | Atomic<br>Type | Coordinates (Angstroms) |           |           |
|------------------|------------------|----------------|-------------------------|-----------|-----------|
|                  |                  |                | X                       | Y         | Z         |
| 1                | 6                | 0              | 0.605319                | -0.967723 | 1.986477  |
| 2                | 6                | 0              | 1.904887                | -1.363787 | 1.928698  |
| 3                | 6                | 0              | -0.162960               | -0.337603 | 0.910514  |
| 4                | 1                | 0              | 0.027108                | -1.107331 | 2.905780  |
| 5                | 1                | 0              | 2.254961                | -1.761026 | 2.888030  |
| 6                | 30               | 0              | 3.283962                | -1.437263 | 0.370542  |
| 7                | 17               | 0              | 5.227043                | -0.311280 | 0.314249  |
| 8                | 17               | 0              | 2.480773                | -2.725386 | -1.393411 |
| 9                | 6                | 0              | 0.547620                | 0.463990  | -0.157893 |
| 10               | 1                | 0              | 1.375357                | -0.113701 | -0.578792 |
| 11               | 1                | 0              | -0.133825               | 0.668515  | -0.989427 |
| 12               | 6                | 0              | -1.524142               | 0.170026  | 1.387080  |
| 13               | 1                | 0              | -2.110838               | -0.683744 | 1.754427  |
| 14               | 1                | 0              | -1.299935               | 0.754353  | 2.293492  |
| 15               | 6                | 0              | -2.384048               | 1.041797  | 0.461307  |
| 16               | 1                | 0              | -2.575534               | 0.542971  | -0.493696 |
| 17               | 1                | 0              | -1.840705               | 1.961853  | 0.213449  |
| 18               | 6                | 0              | -3.722144               | 1.413550  | 1.118239  |
| 19               | 1                | 0              | -3.531208               | 1.909641  | 2.081244  |
| 20               | 1                | 0              | -4.278743               | 0.494444  | 1.356478  |
| 21               | 6                | 0              | -4.594063               | 2.323994  | 0.243717  |
| 22               | 1                | 0              | -4.782783               | 1.831405  | -0.722198 |
| 23               | 1                | 0              | -4.037987               | 3.243434  | 0.009265  |
| 24               | 6                | 0              | -5.933870               | 2.694473  | 0.893679  |
| 25               | 1                | 0              | -5.743578               | 3.188115  | 1.857158  |
| 26               | 1                | 0              | -6.489673               | 1.775197  | 1.128147  |
| 27               | 6                | 0              | -6.798340               | 3.604719  | 0.015014  |
| 28               | 1                | 0              | -7.034208               | 3.124819  | -0.942853 |
| 29               | 1                | 0              | -7.746240               | 3.850497  | 0.506666  |
| 30               | 1                | 0              | -6.283354               | 4.547549  | -0.206043 |
| 31               | 6                | 0              | 1.112619                | 1.797324  | 0.397186  |
| 32               | 1                | 0              | 1.795168                | 1.577208  | 1.225650  |
| 33               | 1                | 0              | 0.300450                | 2.409819  | 0.810796  |
| 34               | 6                | 0              | 1.854379                | 2.589331  | -0.688852 |
| 35               | 1                | 0              | 1.174168                | 2.785968  | -1.530320 |

|    |   |   |           |           |           |
|----|---|---|-----------|-----------|-----------|
| 36 | 1 | 0 | 2.673396  | 1.974241  | -1.085891 |
| 37 | 6 | 0 | 2.426170  | 3.915259  | -0.169123 |
| 38 | 1 | 0 | 3.105897  | 3.710540  | 0.670225  |
| 39 | 1 | 0 | 1.610764  | 4.533254  | 0.237117  |
| 40 | 6 | 0 | 3.178003  | 4.710936  | -1.244723 |
| 41 | 1 | 0 | 2.501012  | 4.911067  | -2.087657 |
| 42 | 1 | 0 | 3.992033  | 4.092069  | -1.645722 |
| 43 | 6 | 0 | 3.750152  | 6.033103  | -0.722720 |
| 44 | 1 | 0 | 4.280849  | 6.577056  | -1.512374 |
| 45 | 1 | 0 | 2.955932  | 6.688056  | -0.342565 |
| 46 | 1 | 0 | 4.458577  | 5.861047  | 0.096738  |
| 47 | 6 | 0 | -0.652200 | -2.016655 | -0.326035 |
| 48 | 6 | 0 | -1.838291 | -1.774797 | -1.204435 |
| 49 | 8 | 0 | -1.770807 | -1.132321 | -2.226795 |
| 50 | 7 | 0 | -0.804663 | -3.015161 | 0.569059  |
| 51 | 7 | 0 | -0.848420 | -3.741651 | 1.424468  |
| 52 | 8 | 0 | -2.957315 | -2.318254 | -0.689870 |
| 53 | 6 | 0 | -4.170314 | -2.149484 | -1.477426 |
| 54 | 1 | 0 | -4.390722 | -1.079667 | -1.543513 |
| 55 | 1 | 0 | -3.976002 | -2.517327 | -2.488670 |
| 56 | 1 | 0 | 0.321880  | -2.120605 | -0.833126 |
| 57 | 6 | 0 | -5.273809 | -2.921844 | -0.781973 |
| 58 | 1 | 0 | -6.205654 | -2.815564 | -1.347278 |
| 59 | 1 | 0 | -5.029401 | -3.986846 | -0.720188 |
| 60 | 1 | 0 | -5.442135 | -2.543455 | 0.231391  |

-----  
Zero-point correction= 0.510167 (Hartree/Particle)  
Thermal correction to Energy= 0.544588  
Thermal correction to Enthalpy= 0.545532  
Thermal correction to Gibbs Free Energy= 0.436065  
Sum of electronic and zero-point Energies= -1989.900793  
Sum of electronic and thermal Energies= -1989.866372  
Sum of electronic and thermal Enthalpies= -1989.865428  
Sum of electronic and thermal Free Energies= -1989.974895  
M06/6-311++G(d,p)-SDD/SMD//B3LYP/6-31G(d)-LANL2DZ energy in dichloromethane solvent = -2151.608136

#### TS10'

-----

| Center<br>Number | Atomic<br>Number | Atomic<br>Type | Coordinates (Angstroms) |           |           |
|------------------|------------------|----------------|-------------------------|-----------|-----------|
|                  |                  |                | X                       | Y         | Z         |
| 1                | 6                | 0              | -0.344721               | -0.504833 | -1.735014 |
| 2                | 6                | 0              | -1.576768               | 0.069351  | -1.719963 |
| 3                | 6                | 0              | 0.670599                | -0.458800 | -0.684145 |
| 4                | 1                | 0              | -0.028570               | -1.086810 | -2.606015 |
| 5                | 1                | 0              | -2.088731               | -0.064318 | -2.680439 |
| 6                | 30               | 0              | -2.954789               | 0.775115  | -0.319254 |
| 7                | 17               | 0              | -2.454136               | 1.842463  | 1.642113  |
| 8                | 17               | 0              | -5.069839               | 0.127935  | -0.854252 |
| 9                | 6                | 0              | 0.772208                | 0.769210  | 0.185303  |
| 10               | 1                | 0              | -0.210784               | 1.061708  | 0.564495  |
| 11               | 1                | 0              | 1.421885                | 0.575948  | 1.047413  |
| 12               | 6                | 0              | 1.969551                | -1.150510 | -1.087449 |
| 13               | 1                | 0              | 1.728129                | -2.168217 | -1.422260 |
| 14               | 1                | 0              | 2.292284                | -0.624431 | -1.999937 |
| 15               | 6                | 0              | 3.146920                | -1.167121 | -0.104891 |
| 16               | 1                | 0              | 2.859005                | -1.637891 | 0.846962  |
| 17               | 1                | 0              | 3.440587                | -0.140295 | 0.146619  |
| 18               | 6                | 0              | 4.362749                | -1.913036 | -0.675761 |
| 19               | 1                | 0              | 4.661762                | -1.442745 | -1.623735 |
| 20               | 1                | 0              | 4.072785                | -2.943837 | -0.926112 |
| 21               | 6                | 0              | 5.562967                | -1.937968 | 0.279422  |
| 22               | 1                | 0              | 5.264589                | -2.408536 | 1.228346  |
| 23               | 1                | 0              | 5.851089                | -0.906132 | 0.529428  |
| 24               | 6                | 0              | 6.779670                | -2.679092 | -0.290942 |
| 25               | 1                | 0              | 7.077848                | -2.208318 | -1.238363 |
| 26               | 1                | 0              | 6.490874                | -3.709774 | -0.540964 |

|    |   |   |           |           |           |
|----|---|---|-----------|-----------|-----------|
| 27 | 6 | 0 | 7.974868  | -2.700879 | 0.667589  |
| 28 | 1 | 0 | 7.717791  | -3.197217 | 1.611489  |
| 29 | 1 | 0 | 8.825664  | -3.236015 | 0.231353  |
| 30 | 1 | 0 | 8.308877  | -1.684208 | 0.908604  |
| 31 | 6 | 0 | 1.346198  | 1.979608  | -0.597494 |
| 32 | 1 | 0 | 0.689092  | 2.187416  | -1.449526 |
| 33 | 1 | 0 | 2.334758  | 1.735363  | -1.010499 |
| 34 | 6 | 0 | 1.452449  | 3.223338  | 0.295879  |
| 35 | 1 | 0 | 2.117032  | 3.007625  | 1.145644  |
| 36 | 1 | 0 | 0.465229  | 3.441982  | 0.724100  |
| 37 | 6 | 0 | 1.973824  | 4.454660  | -0.457271 |
| 38 | 1 | 0 | 1.306059  | 4.671653  | -1.303889 |
| 39 | 1 | 0 | 2.958253  | 4.229210  | -0.895058 |
| 40 | 6 | 0 | 2.087750  | 5.702786  | 0.428538  |
| 41 | 1 | 0 | 2.756050  | 5.486640  | 1.274298  |
| 42 | 1 | 0 | 1.104814  | 5.924769  | 0.866238  |
| 43 | 6 | 0 | 2.601466  | 6.932396  | -0.327861 |
| 44 | 1 | 0 | 2.671756  | 7.805303  | 0.330975  |
| 45 | 1 | 0 | 3.598178  | 6.752063  | -0.749775 |
| 46 | 1 | 0 | 1.933602  | 7.194684  | -1.157582 |
| 47 | 6 | 0 | -0.000807 | -1.931633 | 0.739670  |
| 48 | 6 | 0 | -1.035836 | -2.750878 | 0.023919  |
| 49 | 8 | 0 | -0.702071 | -3.579350 | -0.793215 |
| 50 | 7 | 0 | -0.421849 | -1.294150 | 1.861450  |
| 51 | 7 | 0 | -0.758484 | -0.657676 | 2.724022  |
| 52 | 8 | 0 | -2.271777 | -2.415929 | 0.390451  |
| 53 | 6 | 0 | -3.396739 | -3.132081 | -0.233762 |
| 54 | 1 | 0 | -3.719594 | -2.520478 | -1.078530 |
| 55 | 1 | 0 | -3.020363 | -4.092278 | -0.590423 |
| 56 | 1 | 0 | 0.935855  | -2.447145 | 0.920854  |
| 57 | 6 | 0 | -4.492445 | -3.265848 | 0.803109  |
| 58 | 1 | 0 | -5.340128 | -3.795286 | 0.354514  |
| 59 | 1 | 0 | -4.150414 | -3.836199 | 1.673277  |
| 60 | 1 | 0 | -4.844283 | -2.281487 | 1.123038  |

-----  
Zero-point correction= 0.510548 (Hartree/Particle)  
Thermal correction to Energy= 0.544836  
Thermal correction to Enthalpy= 0.545781  
Thermal correction to Gibbs Free Energy= 0.438503  
Sum of electronic and zero-point Energies= -1989.896260  
Sum of electronic and thermal Energies= -1989.861972  
Sum of electronic and thermal Enthalpies= -1989.861028  
Sum of electronic and thermal Free Energies= -1989.968306  
M06/6-311++G(d,p)-SDD/SMD//B3LYP/6-31G(d)-LANL2DZ energy in dichloromethane solvent = -2151.603324

### Entry 3

| Center<br>Number | Atomic<br>Number | Atomic<br>Type | Coordinates (Angstroms) |           |           |
|------------------|------------------|----------------|-------------------------|-----------|-----------|
|                  |                  |                | X                       | Y         | Z         |
| 1                | 6                | 0              | 0.501248                | -0.647485 | -0.000047 |
| 2                | 6                | 0              | 0.501346                | 0.647419  | 0.000047  |
| 3                | 6                | 0              | -0.861521               | 0.000099  | -0.000000 |
| 4                | 1                | 0              | 1.042734                | -1.581656 | 0.000101  |
| 5                | 1                | 0              | 1.043060                | 1.581466  | -0.000101 |
| 6                | 1                | 0              | -1.466117               | 0.000019  | -0.912847 |
| 7                | 1                | 0              | -1.466117               | -0.000029 | 0.912847  |

-----  
Zero-point correction= 0.056277 (Hartree/Particle)  
Thermal correction to Energy= 0.059594  
Thermal correction to Enthalpy= 0.060538  
Thermal correction to Gibbs Free Energy= 0.032331  
Sum of electronic and zero-point Energies= -116.562764  
Sum of electronic and thermal Energies= -116.559447  
Sum of electronic and thermal Enthalpies= -116.558503  
Sum of electronic and thermal Free Energies= -116.586710  
M06/6-311++G(d,p)-SDD/SMD//B3LYP/6-31G(d)-LANL2DZ energy in tetrahydrofuran solvent = -116.564456

M06/6-311++G(d,p)-SDD/SMD//B3LYP/6-31G(d)-LANL2DZ energy in dichloromethane solvent =-116.565862

**Entry 4**

| Center<br>Number | Atomic<br>Number | Atomic<br>Type | Coordinates (Angstroms) |           |           |
|------------------|------------------|----------------|-------------------------|-----------|-----------|
|                  |                  |                | X                       | Y         | Z         |
| 1                | 6                | 0              | 1.268632                | -0.000215 | -0.648963 |
| 2                | 6                | 0              | 1.268820                | -0.000059 | 0.648870  |
| 3                | 6                | 0              | -0.097562               | -0.000046 | 0.000105  |
| 4                | 1                | 0              | 1.822540                | -0.000762 | -1.577739 |
| 5                | 1                | 0              | 1.822429                | -0.000138 | 1.577807  |
| 6                | 6                | 0              | -0.940873               | 1.273507  | -0.000067 |
| 7                | 1                | 0              | -1.592576               | 1.317176  | -0.883559 |
| 8                | 1                | 0              | -1.592336               | 1.317459  | 0.883592  |
| 9                | 1                | 0              | -0.309560               | 2.168005  | -0.000305 |
| 10               | 6                | 0              | -0.941370               | -1.273223 | 0.000059  |
| 11               | 1                | 0              | -1.592903               | -1.316795 | 0.883684  |
| 12               | 1                | 0              | -1.593037               | -1.316738 | -0.883473 |
| 13               | 1                | 0              | -0.310441               | -2.168000 | -0.000031 |

Zero-point correction= 0.112207 (Hartree/Particle)

Thermal correction to Energy= 0.118166

Thermal correction to Enthalpy= 0.119110

Thermal correction to Gibbs Free Energy= 0.083895

Sum of electronic and zero-point Energies= -195.140861

Sum of electronic and thermal Energies= -195.134901

Sum of electronic and thermal Enthalpies= -195.133957

Sum of electronic and thermal Free Energies= -195.169172

M06/6-311++G(d,p)-SDD/SMD//B3LYP/6-31G(d)-LANL2DZ energy in tetrahydrofuran solvent = -195.152582

M06/6-311++G(d,p)-SDD/SMD//B3LYP/6-31G(d)-LANL2DZ energy in dichloromethane solvent =-195.154290

**Entry 5**

| Center<br>Number | Atomic<br>Number | Atomic<br>Type | Coordinates (Angstroms) |           |           |
|------------------|------------------|----------------|-------------------------|-----------|-----------|
|                  |                  |                | X                       | Y         | Z         |
| 1                | 6                | 0              | 2.900611                | -1.048515 | -0.599581 |
| 2                | 6                | 0              | 2.592536                | -1.048003 | 0.660659  |
| 3                | 6                | 0              | 2.128877                | 0.163724  | -0.118228 |
| 4                | 1                | 0              | 3.389349                | -1.529243 | -1.435570 |
| 5                | 1                | 0              | 2.652299                | -1.527640 | 1.627888  |
| 6                | 6                | 0              | 2.891948                | 1.479426  | 0.065723  |
| 7                | 1                | 0              | 2.765683                | 2.140243  | -0.802932 |
| 8                | 1                | 0              | 2.551441                | 2.034968  | 0.948590  |
| 9                | 1                | 0              | 3.962414                | 1.287061  | 0.191253  |
| 10               | 6                | 0              | 0.668528                | 0.370403  | -0.583502 |
| 11               | 1                | 0              | 0.762639                | 0.910092  | -1.541669 |
| 12               | 6                | 0              | -0.198873               | 1.273506  | 0.339566  |
| 13               | 6                | 0              | -0.137370               | -0.921481 | -0.883149 |
| 14               | 1                | 0              | 0.352443                | 2.187780  | 0.589570  |
| 15               | 6                | 0              | -0.577973               | 0.530384  | 1.638308  |
| 16               | 6                | 0              | -1.488426               | 1.663760  | -0.416340 |
| 17               | 1                | 0              | 0.469716                | -1.590104 | -1.508407 |
| 18               | 6                | 0              | -0.545572               | -1.660325 | 0.410501  |
| 19               | 6                | 0              | -1.424633               | -0.533452 | -1.645600 |
| 20               | 1                | 0              | -1.163194               | 1.195999  | 2.288450  |
| 21               | 1                | 0              | 0.325222                | 0.254689  | 2.198555  |
| 22               | 6                | 0              | -1.397353               | -0.732440 | 1.298760  |
| 23               | 1                | 0              | -1.234172               | 2.219818  | -1.329545 |
| 24               | 1                | 0              | -2.099097               | 2.334397  | 0.204770  |
| 25               | 6                | 0              | -2.292598               | 0.396698  | -0.770209 |
| 26               | 1                | 0              | 0.338381                | -2.002142 | 0.960474  |
| 27               | 1                | 0              | -1.119049               | -2.561073 | 0.148574  |
| 28               | 1                | 0              | -1.170179               | -0.032808 | -2.590143 |
| 29               | 1                | 0              | -1.991074               | -1.438525 | -1.906882 |
| 30               | 1                | 0              | -1.670495               | -1.255749 | 2.225211  |

|    |   |   |           |           |           |
|----|---|---|-----------|-----------|-----------|
| 31 | 6 | 0 | -2.676835 | -0.332806 | 0.534084  |
| 32 | 1 | 0 | -3.201993 | 0.676021  | -1.319290 |
| 33 | 1 | 0 | -3.273037 | -1.227733 | 0.306718  |
| 34 | 1 | 0 | -3.304509 | 0.318673  | 1.158446  |

-----

Zero-point correction= 0.309417 (Hartree/Particle)  
Thermal correction to Energy= 0.320842  
Thermal correction to Enthalpy= 0.321786  
Thermal correction to Gibbs Free Energy= 0.273031  
Sum of electronic and zero-point Energies= -545.145944  
Sum of electronic and thermal Energies= -545.134520  
Sum of electronic and thermal Enthalpies= -545.133575  
Sum of electronic and thermal Free Energies= -545.182330  
M06/6-311++G(d,p)-SDD/SMD//B3LYP/6-31G(d)-LANL2DZ energy in tetrahydrofuran solvent = -545.182695  
M06/6-311++G(d,p)-SDD/SMD//B3LYP/6-31G(d)-LANL2DZ energy in dichloromethane solvent =-545.185209

### Entry 6

-----

| Center<br>Number | Atomic<br>Number | Atomic<br>Type | Coordinates (Angstroms) |           |           |
|------------------|------------------|----------------|-------------------------|-----------|-----------|
|                  |                  |                | X                       | Y         | Z         |
| 1                | 6                | 0              | 2.299681                | 0.770949  | -0.131893 |
| 2                | 6                | 0              | 2.592234                | -0.448441 | -0.480316 |
| 3                | 6                | 0              | 1.591431                | -0.318791 | 0.652027  |
| 4                | 6                | 0              | 2.081087                | -0.610024 | 2.078134  |
| 5                | 1                | 0              | 1.847098                | -1.639480 | 2.383609  |
| 6                | 1                | 0              | 1.624684                | 0.056566  | 2.821016  |
| 7                | 6                | 0              | 0.117206                | -0.745038 | 0.438500  |
| 8                | 1                | 0              | 0.105579                | -1.814443 | 0.711791  |
| 9                | 6                | 0              | -0.422396               | -0.665761 | -1.015093 |
| 10               | 6                | 0              | -0.919854               | -0.054206 | 1.370627  |
| 11               | 1                | 0              | 0.307292                | -1.118567 | -1.699266 |
| 12               | 6                | 0              | -0.699081               | 0.788411  | -1.455107 |
| 13               | 6                | 0              | -1.751022               | -1.453040 | -1.089460 |
| 14               | 1                | 0              | -0.557099               | -0.069799 | 2.405442  |
| 15               | 6                | 0              | -1.167451               | 1.405877  | 0.936536  |
| 16               | 6                | 0              | -2.251800               | -0.834103 | 1.299825  |
| 17               | 1                | 0              | -1.090901               | 0.788949  | -2.482552 |
| 18               | 1                | 0              | 0.227685                | 1.369989  | -1.474454 |
| 19               | 6                | 0              | -1.722958               | 1.438337  | -0.503116 |
| 20               | 1                | 0              | -1.585769               | -2.504064 | -0.814386 |
| 21               | 1                | 0              | -2.130317               | -1.449433 | -2.121316 |
| 22               | 6                | 0              | -2.792746               | -0.816203 | -0.144020 |
| 23               | 1                | 0              | -0.237164               | 1.985380  | 0.996984  |
| 24               | 1                | 0              | -1.880448               | 1.881104  | 1.625235  |
| 25               | 1                | 0              | -2.098659               | -1.869420 | 1.635129  |
| 26               | 1                | 0              | -2.987886               | -0.384510 | 1.981561  |
| 27               | 1                | 0              | -1.902601               | 2.478769  | -0.806963 |
| 28               | 6                | 0              | -3.045927               | 0.646311  | -0.566052 |
| 29               | 1                | 0              | -3.732065               | -1.383472 | -0.195201 |
| 30               | 1                | 0              | -3.794765               | 1.104308  | 0.095610  |
| 31               | 1                | 0              | -3.456419               | 0.681359  | -1.585097 |
| 32               | 1                | 0              | 3.167069                | -0.478596 | 2.146079  |
| 33               | 6                | 0              | 2.579737                | 2.227404  | -0.212684 |
| 34               | 1                | 0              | 2.992811                | 2.591294  | 0.737692  |
| 35               | 1                | 0              | 3.302454                | 2.451989  | -1.005176 |
| 36               | 1                | 0              | 1.669504                | 2.808458  | -0.404937 |
| 37               | 6                | 0              | 3.403837                | -1.409352 | -1.267612 |
| 38               | 1                | 0              | 2.767406                | -2.097172 | -1.838602 |
| 39               | 1                | 0              | 4.068721                | -0.895147 | -1.970710 |
| 40               | 1                | 0              | 4.021910                | -2.028040 | -0.603257 |

-----

Zero-point correction= 0.366171 (Hartree/Particle)  
Thermal correction to Energy= 0.381159  
Thermal correction to Enthalpy= 0.382103  
Thermal correction to Gibbs Free Energy= 0.325287  
Sum of electronic and zero-point Energies= -623.736171

Sum of electronic and thermal Energies= -623.721183  
 Sum of electronic and thermal Enthalpies= -623.720239  
 Sum of electronic and thermal Free Energies= -623.777056  
 M06/6-311++G(d,p)-SDD/SMD//B3LYP/6-31G(d)-LANL2DZ energy in tetrahydrofuran solvent = -623.780245  
 M06/6-311++G(d,p)-SDD/SMD//B3LYP/6-31G(d)-LANL2DZ energy in dichloromethane solvent = -623.783077

**TS(Ru)-Entry 2**

| Center<br>Number | Atomic<br>Number | Atomic<br>Type | Coordinates (Angstroms) |           |           |
|------------------|------------------|----------------|-------------------------|-----------|-----------|
|                  |                  |                | X                       | Y         | Z         |
| 1                | 6                | 0              | -1.916745               | -1.876624 | 1.775769  |
| 2                | 6                | 0              | -2.849535               | -0.949829 | 1.174902  |
| 3                | 6                | 0              | -3.441667               | -1.576344 | 0.007015  |
| 4                | 6                | 0              | -2.804881               | -2.843560 | -0.167157 |
| 5                | 6                | 0              | -1.847973               | -3.028151 | 0.920202  |
| 6                | 6                | 0              | -1.200221               | -1.704897 | 3.083284  |
| 7                | 1                | 0              | -0.192759               | -2.133740 | 3.053239  |
| 8                | 1                | 0              | -1.105090               | -0.649588 | 3.359086  |
| 9                | 1                | 0              | -1.744134               | -2.201520 | 3.899047  |
| 10               | 6                | 0              | -3.258310               | 0.377875  | 1.742324  |
| 11               | 1                | 0              | -2.450008               | 0.836768  | 2.319662  |
| 12               | 1                | 0              | -3.542396               | 1.079325  | 0.952555  |
| 13               | 1                | 0              | -4.121990               | 0.265049  | 2.413287  |
| 14               | 6                | 0              | -4.510089               | -0.993009 | -0.868198 |
| 15               | 1                | 0              | -4.504508               | 0.100191  | -0.830412 |
| 16               | 1                | 0              | -4.365542               | -1.282331 | -1.912572 |
| 17               | 1                | 0              | -5.506807               | -1.332987 | -0.553024 |
| 18               | 6                | 0              | -3.097515               | -3.838010 | -1.251053 |
| 19               | 1                | 0              | -3.387421               | -3.338381 | -2.178805 |
| 20               | 1                | 0              | -2.222677               | -4.456561 | -1.471631 |
| 21               | 1                | 0              | -3.915048               | -4.509150 | -0.951852 |
| 22               | 6                | 0              | -1.042423               | -4.268699 | 1.169848  |
| 23               | 1                | 0              | -0.735727               | -4.742274 | 0.232534  |
| 24               | 1                | 0              | -0.137275               | -4.049333 | 1.743810  |
| 25               | 1                | 0              | -1.628035               | -5.006128 | 1.737948  |
| 26               | 17               | 0              | -1.120551               | -0.820391 | -2.627074 |
| 27               | 44               | 0              | -1.256249               | -1.315554 | -0.251460 |
| 28               | 6                | 0              | 0.909330                | 0.091803  | 0.748807  |
| 29               | 6                | 0              | 0.821337                | -0.800350 | -0.256936 |
| 30               | 6                | 0              | 1.390211                | 0.908665  | -0.319295 |
| 31               | 1                | 0              | 0.433616                | 0.199569  | 1.717818  |
| 32               | 1                | 0              | 1.378926                | -1.284377 | -1.040810 |
| 33               | 6                | 0              | 0.534474                | 2.014554  | -0.911426 |
| 34               | 1                | 0              | -0.410074               | 1.581200  | -1.262327 |
| 35               | 1                | 0              | 1.032890                | 2.423295  | -1.800712 |
| 36               | 6                | 0              | 2.875104                | 0.980515  | -0.668448 |
| 37               | 1                | 0              | 2.989267                | 0.928760  | -1.761067 |
| 38               | 1                | 0              | 3.195684                | 1.999613  | -0.393418 |
| 39               | 6                | 0              | 0.249510                | 3.156873  | 0.083626  |
| 40               | 1                | 0              | -0.277794               | 2.752545  | 0.960067  |
| 41               | 1                | 0              | 1.198825                | 3.566789  | 0.459516  |
| 42               | 6                | 0              | -0.585553               | 4.288811  | -0.529648 |
| 43               | 1                | 0              | -1.531075               | 3.874253  | -0.908666 |
| 44               | 1                | 0              | -0.059141               | 4.692830  | -1.406801 |
| 45               | 6                | 0              | -0.884799               | 5.428964  | 0.452479  |
| 46               | 1                | 0              | -1.412471               | 5.025254  | 1.329905  |
| 47               | 1                | 0              | 0.062383                | 5.841139  | 0.832053  |
| 48               | 6                | 0              | -1.718730               | 6.562465  | -0.159692 |
| 49               | 1                | 0              | -2.665089               | 6.151090  | -0.538577 |
| 50               | 1                | 0              | -1.191588               | 6.966472  | -1.035630 |
| 51               | 6                | 0              | -2.013390               | 7.697099  | 0.827255  |
| 52               | 1                | 0              | -2.609455               | 8.489598  | 0.360304  |
| 53               | 1                | 0              | -2.570938               | 7.330426  | 1.698197  |
| 54               | 1                | 0              | -1.085933               | 8.151922  | 1.197034  |
| 55               | 6                | 0              | 3.822410                | -0.020719 | 0.000508  |
| 56               | 1                | 0              | 3.552386                | -1.046315 | -0.284101 |

|    |   |   |          |           |           |
|----|---|---|----------|-----------|-----------|
| 57 | 1 | 0 | 3.701562 | 0.030003  | 1.092005  |
| 58 | 6 | 0 | 5.292042 | 0.228118  | -0.366679 |
| 59 | 1 | 0 | 5.406433 | 0.184162  | -1.459883 |
| 60 | 1 | 0 | 5.573518 | 1.250314  | -0.073042 |
| 61 | 6 | 0 | 6.258730 | -0.770042 | 0.283904  |
| 62 | 1 | 0 | 5.978633 | -1.792372 | -0.011028 |
| 63 | 1 | 0 | 6.144136 | -0.727886 | 1.377484  |
| 64 | 6 | 0 | 7.729090 | -0.524508 | -0.079813 |
| 65 | 1 | 0 | 7.843298 | -0.567208 | -1.172325 |
| 66 | 1 | 0 | 8.009107 | 0.496920  | 0.215057  |
| 67 | 6 | 0 | 8.688063 | -1.525529 | 0.573303  |
| 68 | 1 | 0 | 9.728596 | -1.323643 | 0.294332  |
| 69 | 1 | 0 | 8.622025 | -1.481881 | 1.667579  |
| 70 | 1 | 0 | 8.455202 | -2.553618 | 0.269369  |

-----

Zero-point correction= 0.622266 (Hartree/Particle)  
Thermal correction to Energy= 0.658762  
Thermal correction to Enthalpy= 0.659706  
Thermal correction to Gibbs Free Energy= 0.547578  
Sum of electronic and zero-point Energies= -1531.977940  
Sum of electronic and thermal Energies= -1531.941444  
Sum of electronic and thermal Enthalpies= -1531.940500  
Sum of electronic and thermal Free Energies= -1532.052628  
M06/6-311++G(d,p)-SDD/SMD//B3LYP/6-31G(d)-LANL2DZ energy in tetrahydrofuran solvent = -1533.112907

### TS(Ru)-Entry 3

-----

| Center<br>Number | Atomic<br>Number | Atomic<br>Type | Coordinates (Angstroms) |           |           |
|------------------|------------------|----------------|-------------------------|-----------|-----------|
|                  |                  |                | X                       | Y         | Z         |
| 1                | 6                | 0              | 1.038338                | 1.531986  | 0.230413  |
| 2                | 6                | 0              | 1.065623                | 0.582861  | 1.322805  |
| 3                | 6                | 0              | 1.580695                | -0.681880 | 0.827450  |
| 4                | 6                | 0              | 1.772647                | -0.540882 | -0.580761 |
| 5                | 6                | 0              | 1.433104                | 0.829619  | -0.955860 |
| 6                | 6                | 0              | 0.707493                | 2.992481  | 0.331237  |
| 7                | 1                | 0              | 0.260252                | 3.368856  | -0.594014 |
| 8                | 1                | 0              | 0.001765                | 3.193576  | 1.143924  |
| 9                | 1                | 0              | 1.608865                | 3.589226  | 0.530188  |
| 10               | 6                | 0              | 0.765905                | 0.888020  | 2.760998  |
| 11               | 1                | 0              | 0.042521                | 1.703330  | 2.858597  |
| 12               | 1                | 0              | 0.357198                | 0.015041  | 3.278041  |
| 13               | 1                | 0              | 1.679151                | 1.193052  | 3.291929  |
| 14               | 6                | 0              | 1.845756                | -1.907449 | 1.649212  |
| 15               | 1                | 0              | 1.162917                | -1.971324 | 2.501204  |
| 16               | 1                | 0              | 1.713098                | -2.818031 | 1.059403  |
| 17               | 1                | 0              | 2.872694                | -1.901852 | 2.041521  |
| 18               | 6                | 0              | 2.290323                | -1.593323 | -1.516050 |
| 19               | 1                | 0              | 2.035061                | -2.597101 | -1.166871 |
| 20               | 1                | 0              | 1.869857                | -1.477082 | -2.519554 |
| 21               | 1                | 0              | 3.384262                | -1.531657 | -1.604703 |
| 22               | 6                | 0              | 1.599465                | 1.419450  | -2.325351 |
| 23               | 1                | 0              | 1.374078                | 0.687595  | -3.107213 |
| 24               | 1                | 0              | 0.940436                | 2.279826  | -2.474763 |
| 25               | 1                | 0              | 2.633036                | 1.760919  | -2.481310 |
| 26               | 17               | 0              | -1.569072               | -2.214164 | -0.136968 |
| 27               | 44               | 0              | -0.329580               | -0.143427 | -0.155400 |
| 28               | 6                | 0              | -2.727815               | 1.341327  | 0.267848  |
| 29               | 6                | 0              | -2.191993               | 0.704437  | -0.791062 |
| 30               | 6                | 0              | -3.774000               | 0.421829  | -0.010212 |
| 31               | 1                | 0              | -2.317418               | 1.852493  | 1.131603  |
| 32               | 1                | 0              | -2.401885               | 0.471486  | -1.823690 |
| 33               | 1                | 0              | -4.513873               | 0.658016  | -0.767750 |
| 34               | 1                | 0              | -3.959500               | -0.455639 | 0.605512  |

-----

Zero-point correction= 0.279867 (Hartree/Particle)  
Thermal correction to Energy= 0.299733



Thermal correction to Enthalpy= 0.300677  
 Thermal correction to Gibbs Free Energy= 0.230494  
 Sum of electronic and zero-point Energies= -1060.556617  
 Sum of electronic and thermal Energies= -1060.536751  
 Sum of electronic and thermal Enthalpies= -1060.535807  
 Sum of electronic and thermal Free Energies= -1060.605989  
 M06/6-311++G(d,p)-SDD/SMD//B3LYP/6-31G(d)-LANL2DZ energy in tetrahydrofuran solvent = -1061.604004

#### TS(Ru)-Entry 4

| Center Number | Atomic Number | Atomic Type | Coordinates (Angstroms) |           |           |
|---------------|---------------|-------------|-------------------------|-----------|-----------|
|               |               |             | X                       | Y         | Z         |
| 1             | 6             | 0           | 1.327772                | 1.618112  | 0.040476  |
| 2             | 6             | 0           | 1.253429                | 0.883174  | 1.281114  |
| 3             | 6             | 0           | 1.835387                | -0.432174 | 1.078565  |
| 4             | 6             | 0           | 2.183103                | -0.538897 | -0.300457 |
| 5             | 6             | 0           | 1.849461                | 0.721595  | -0.956063 |
| 6             | 6             | 0           | 0.992806                | 3.066287  | -0.167624 |
| 7             | 1             | 0           | 0.542665                | 3.240947  | -1.150641 |
| 8             | 1             | 0           | 0.293425                | 3.435770  | 0.589344  |
| 9             | 1             | 0           | 1.894411                | 3.691399  | -0.103129 |
| 10            | 6             | 0           | 0.805135                | 1.430158  | 2.604932  |
| 11            | 1             | 0           | 0.071438                | 2.232776  | 2.485027  |
| 12            | 1             | 0           | 0.350520                | 0.652662  | 3.226187  |
| 13            | 1             | 0           | 1.657789                | 1.842541  | 3.163054  |
| 14            | 6             | 0           | 2.021237                | -1.490179 | 2.124500  |
| 15            | 1             | 0           | 1.294420                | -1.383394 | 2.935175  |
| 16            | 1             | 0           | 1.892735                | -2.489719 | 1.700529  |
| 17            | 1             | 0           | 3.025440                | -1.433867 | 2.568223  |
| 18            | 6             | 0           | 2.808678                | -1.729211 | -0.964357 |
| 19            | 1             | 0           | 2.459974                | -2.661886 | -0.514176 |
| 20            | 1             | 0           | 2.559901                | -1.768265 | -2.028502 |
| 21            | 1             | 0           | 3.903489                | -1.690100 | -0.876142 |
| 22            | 6             | 0           | 2.146968                | 1.066135  | -2.385132 |
| 23            | 1             | 0           | 2.034069                | 0.195920  | -3.038029 |
| 24            | 1             | 0           | 1.478422                | 1.848879  | -2.755047 |
| 25            | 1             | 0           | 3.179515                | 1.429867  | -2.490384 |
| 26            | 17            | 0           | -0.796626               | -2.432934 | -0.399696 |
| 27            | 44            | 0           | 0.029503                | -0.148115 | -0.197262 |
| 28            | 6             | 0           | -2.190792               | 1.325993  | -0.246220 |
| 29            | 6             | 0           | -1.810980               | 0.331426  | -1.085557 |
| 30            | 6             | 0           | -3.221554               | 0.401476  | 0.101474  |
| 31            | 1             | 0           | -1.700255               | 2.191397  | 0.186908  |
| 32            | 1             | 0           | -2.214293               | -0.294173 | -1.865226 |
| 33            | 6             | 0           | -4.506120               | 0.329255  | -0.699109 |
| 34            | 1             | 0           | -4.819313               | -0.709388 | -0.862608 |
| 35            | 1             | 0           | -5.313749               | 0.827333  | -0.142196 |
| 36            | 1             | 0           | -4.413468               | 0.828770  | -1.667522 |
| 37            | 6             | 0           | -3.210782               | -0.375871 | 1.396150  |
| 38            | 1             | 0           | -4.140328               | -0.201263 | 1.955431  |
| 39            | 1             | 0           | -3.132774               | -1.452496 | 1.193047  |
| 40            | 1             | 0           | -2.362007               | -0.100441 | 2.028862  |

Zero-point correction= 0.336202 (Hartree/Particle)  
 Thermal correction to Energy= 0.358961  
 Thermal correction to Enthalpy= 0.359905  
 Thermal correction to Gibbs Free Energy= 0.283291  
 Sum of electronic and zero-point Energies= -1139.136681  
 Sum of electronic and thermal Energies= -1139.113922  
 Sum of electronic and thermal Enthalpies= -1139.112978  
 Sum of electronic and thermal Free Energies= -1139.189592  
 M06/6-311++G(d,p)-SDD/SMD//B3LYP/6-31G(d)-LANL2DZ energy in tetrahydrofuran solvent = -1140.199257

#### TS(Ru)-Entry 5

| Center Number | Atomic Number | Atomic Type | Coordinates (Angstroms) |   |   |
|---------------|---------------|-------------|-------------------------|---|---|
|               |               |             | X                       | Y | Z |

|    |    |   |           |           |           |
|----|----|---|-----------|-----------|-----------|
| 1  | 6  | 0 | -2.664658 | 1.723014  | -0.524575 |
| 2  | 6  | 0 | -3.163311 | 0.642550  | -1.347156 |
| 3  | 6  | 0 | -3.962318 | -0.241799 | -0.519999 |
| 4  | 6  | 0 | -3.872779 | 0.235445  | 0.824815  |
| 5  | 6  | 0 | -3.061223 | 1.449255  | 0.827632  |
| 6  | 6  | 0 | -1.927017 | 2.940978  | -0.998939 |
| 7  | 1  | 0 | -1.172451 | 3.266147  | -0.274535 |
| 8  | 1  | 0 | -1.418825 | 2.762151  | -1.952153 |
| 9  | 1  | 0 | -2.615567 | 3.783219  | -1.155603 |
| 10 | 6  | 0 | -3.010240 | 0.528402  | -2.835586 |
| 11 | 1  | 0 | -2.086464 | 1.000039  | -3.183953 |
| 12 | 1  | 0 | -2.990583 | -0.517342 | -3.155719 |
| 13 | 1  | 0 | -3.847943 | 1.018936  | -3.351816 |
| 14 | 6  | 0 | -4.722968 | -1.447341 | -0.984629 |
| 15 | 1  | 0 | -4.294579 | -1.860202 | -1.902449 |
| 16 | 1  | 0 | -4.702413 | -2.240560 | -0.232465 |
| 17 | 1  | 0 | -5.773216 | -1.195682 | -1.189510 |
| 18 | 6  | 0 | -4.539390 | -0.370559 | 2.023798  |
| 19 | 1  | 0 | -5.546914 | 0.047271  | 2.160888  |
| 20 | 1  | 0 | -4.630721 | -1.454650 | 1.920197  |
| 21 | 1  | 0 | -3.970709 | -0.174673 | 2.937602  |
| 22 | 6  | 0 | -2.810226 | 2.325783  | 2.018990  |
| 23 | 1  | 0 | -2.718411 | 1.737519  | 2.936927  |
| 24 | 1  | 0 | -1.890419 | 2.906592  | 1.902466  |
| 25 | 1  | 0 | -3.637558 | 3.036051  | 2.162163  |
| 26 | 17 | 0 | -1.531989 | -2.539544 | 0.764504  |
| 27 | 44 | 0 | -1.854241 | -0.210751 | 0.155160  |
| 28 | 6  | 0 | 0.744739  | 0.517836  | -0.591180 |
| 29 | 6  | 0 | 0.258060  | -0.057962 | 0.522991  |
| 30 | 6  | 0 | 1.521546  | -0.679969 | -0.596458 |
| 31 | 1  | 0 | 0.369836  | 1.252969  | -1.296477 |
| 32 | 1  | 0 | 0.524229  | -0.479543 | 1.477088  |
| 33 | 6  | 0 | 1.189875  | -1.796672 | -1.565485 |
| 34 | 1  | 0 | 1.650395  | -2.743694 | -1.262519 |
| 35 | 1  | 0 | 1.542079  | -1.559762 | -2.580412 |
| 36 | 6  | 0 | 2.880293  | -0.801942 | 0.115823  |
| 37 | 1  | 0 | 2.848124  | -1.755399 | 0.665889  |
| 38 | 6  | 0 | 3.263936  | 0.311081  | 1.126898  |
| 39 | 6  | 0 | 4.049031  | -0.929072 | -0.915688 |
| 40 | 1  | 0 | 2.458694  | 0.446673  | 1.858838  |
| 41 | 6  | 0 | 3.544145  | 1.656196  | 0.421669  |
| 42 | 6  | 0 | 4.543285  | -0.127103 | 1.876939  |
| 43 | 1  | 0 | 3.800197  | -1.694758 | -1.658811 |
| 44 | 6  | 0 | 4.304495  | 0.416971  | -1.625171 |
| 45 | 6  | 0 | 5.327282  | -1.362107 | -0.164334 |
| 46 | 1  | 0 | 3.808037  | 2.411408  | 1.175159  |
| 47 | 1  | 0 | 2.644868  | 2.024372  | -0.088184 |
| 48 | 6  | 0 | 4.696741  | 1.489974  | -0.588440 |
| 49 | 1  | 0 | 4.364302  | -1.069598 | 2.412213  |
| 50 | 1  | 0 | 4.800415  | 0.625865  | 2.634579  |
| 51 | 6  | 0 | 5.708339  | -0.294976 | 0.879804  |
| 52 | 1  | 0 | 3.410809  | 0.735727  | -2.179002 |
| 53 | 1  | 0 | 5.106962  | 0.294818  | -2.365727 |
| 54 | 1  | 0 | 5.165452  | -2.332755 | 0.324103  |
| 55 | 1  | 0 | 6.147771  | -1.499501 | -0.882345 |
| 56 | 1  | 0 | 4.882698  | 2.445166  | -1.097396 |
| 57 | 6  | 0 | 5.970695  | 1.045526  | 0.161489  |
| 58 | 1  | 0 | 6.612015  | -0.609445 | 1.418488  |
| 59 | 1  | 0 | 6.806666  | 0.937670  | -0.543682 |
| 60 | 1  | 0 | 6.264819  | 1.813981  | 0.889917  |
| 61 | 1  | 0 | 0.108841  | -1.954751 | -1.606631 |

-----  
Zero-point correction= 0.532941 (Hartree/Particle)  
Thermal correction to Energy= 0.561605  
Thermal correction to Enthalpy= 0.562550  
Thermal correction to Gibbs Free Energy= 0.471870

Sum of electronic and zero-point Energies= -1489.136543  
 Sum of electronic and thermal Energies= -1489.107879  
 Sum of electronic and thermal Enthalpies= -1489.106934  
 Sum of electronic and thermal Free Energies= -1489.197614  
 M06/6-311++G(d,p)-SDD/SMD//B3LYP/6-31G(d)-LANL2DZ energy in tetrahydrofuran solvent =-1490.228844

**TS(Ru)-Entry 6**

| Center Number | Atomic Number | Atomic Type | Coordinates (Angstroms) |           |           |
|---------------|---------------|-------------|-------------------------|-----------|-----------|
|               |               |             | X                       | Y         | Z         |
| 1             | 6             | 0           | -3.362002               | 0.998349  | -1.153065 |
| 2             | 6             | 0           | -4.137698               | -0.046219 | -0.509817 |
| 3             | 6             | 0           | -3.970459               | 0.101503  | 0.906005  |
| 4             | 6             | 0           | -3.112901               | 1.256153  | 1.139124  |
| 5             | 6             | 0           | -2.771829               | 1.830671  | -0.133763 |
| 6             | 6             | 0           | -3.332926               | 1.245553  | -2.633182 |
| 7             | 1             | 0           | -2.473631               | 1.851779  | -2.932330 |
| 8             | 1             | 0           | -3.292213               | 0.307606  | -3.195462 |
| 9             | 1             | 0           | -4.239140               | 1.781502  | -2.949819 |
| 10            | 6             | 0           | -4.975949               | -1.079178 | -1.202023 |
| 11            | 1             | 0           | -6.016402               | -0.738449 | -1.303031 |
| 12            | 1             | 0           | -4.596884               | -1.293236 | -2.205717 |
| 13            | 1             | 0           | -4.977748               | -2.021741 | -0.648311 |
| 14            | 6             | 0           | -4.614209               | -0.742551 | 1.965728  |
| 15            | 1             | 0           | -5.601239               | -0.341463 | 2.237111  |
| 16            | 1             | 0           | -4.746064               | -1.772483 | 1.624718  |
| 17            | 1             | 0           | -4.006390               | -0.774240 | 2.874960  |
| 18            | 6             | 0           | -2.777649               | 1.833523  | 2.482667  |
| 19            | 1             | 0           | -3.570361               | 2.516382  | 2.820967  |
| 20            | 1             | 0           | -2.672684               | 1.053444  | 3.243205  |
| 21            | 1             | 0           | -1.844451               | 2.405057  | 2.455006  |
| 22            | 6             | 0           | -2.029529               | 3.120510  | -0.337825 |
| 23            | 1             | 0           | -1.194499               | 3.224393  | 0.362853  |
| 24            | 1             | 0           | -1.621493               | 3.202170  | -1.349459 |
| 25            | 1             | 0           | -2.694855               | 3.982711  | -0.187740 |
| 26            | 17            | 0           | -1.789345               | -2.659212 | 0.150639  |
| 27            | 44            | 0           | -2.034860               | -0.256516 | 0.034240  |
| 28            | 6             | 0           | 0.827003                | 0.135468  | -0.819286 |
| 29            | 6             | 0           | 0.279438                | -0.110017 | 0.377613  |
| 30            | 6             | 0           | 1.730851                | -0.906838 | -0.436228 |
| 31            | 6             | 0           | 1.573537                | -2.286667 | -1.046117 |
| 32            | 1             | 0           | 1.888919                | -3.074382 | -0.351011 |
| 33            | 1             | 0           | 2.181622                | -2.391740 | -1.956613 |
| 34            | 6             | 0           | 3.002468                | -0.660569 | 0.385908  |
| 35            | 1             | 0           | 2.891861                | -1.221402 | 1.330979  |
| 36            | 6             | 0           | 3.325591                | 0.816977  | 0.753504  |
| 37            | 6             | 0           | 4.275403                | -1.261797 | -0.297150 |
| 38            | 1             | 0           | 2.449497                | 1.291855  | 1.206857  |
| 39            | 6             | 0           | 3.748351                | 1.633932  | -0.487378 |
| 40            | 6             | 0           | 4.490092                | 0.831587  | 1.770017  |
| 41            | 1             | 0           | 4.082013                | -2.299522 | -0.586279 |
| 42            | 6             | 0           | 4.675694                | -0.443130 | -1.542111 |
| 43            | 6             | 0           | 5.438006                | -1.243258 | 0.719645  |
| 44            | 1             | 0           | 3.958134                | 2.668906  | -0.182734 |
| 45            | 1             | 0           | 2.933053                | 1.683187  | -1.217560 |
| 46            | 6             | 0           | 4.999829                | 1.008206  | -1.132886 |
| 47            | 1             | 0           | 4.209599                | 0.278635  | 2.677489  |
| 48            | 1             | 0           | 4.696526                | 1.865614  | 2.079352  |
| 49            | 6             | 0           | 5.750751                | 0.206384  | 1.137545  |
| 50            | 1             | 0           | 3.866594                | -0.453207 | -2.285089 |
| 51            | 1             | 0           | 5.549970                | -0.906198 | -2.020316 |
| 52            | 1             | 0           | 5.176627                | -1.845987 | 1.600336  |
| 53            | 1             | 0           | 6.326971                | -1.706684 | 0.269441  |
| 54            | 1             | 0           | 5.287332                | 1.587430  | -2.020574 |
| 55            | 6             | 0           | 6.157230                | 1.015520  | -0.112045 |
| 56            | 1             | 0           | 6.572045                | 0.213518  | 1.866465  |

|    |   |   |           |           |           |
|----|---|---|-----------|-----------|-----------|
| 57 | 1 | 0 | 7.062107  | 0.583615  | -0.562009 |
| 58 | 1 | 0 | 6.403018  | 2.049033  | 0.169520  |
| 59 | 1 | 0 | 0.529332  | -2.478870 | -1.302060 |
| 60 | 6 | 0 | 0.404870  | 0.691057  | -2.140522 |
| 61 | 1 | 0 | 0.035208  | -0.108708 | -2.795005 |
| 62 | 1 | 0 | -0.385108 | 1.433708  | -2.023216 |
| 63 | 1 | 0 | 1.265873  | 1.147067  | -2.645410 |
| 64 | 6 | 0 | 0.329496  | -0.300153 | 1.859817  |
| 65 | 1 | 0 | 1.350387  | -0.313891 | 2.263012  |
| 66 | 1 | 0 | -0.226199 | 0.491868  | 2.371575  |
| 67 | 1 | 0 | -0.145395 | -1.254064 | 2.113441  |

-----

Zero-point correction= 0.590758 (Hartree/Particle)  
Thermal correction to Energy= 0.622372  
Thermal correction to Enthalpy= 0.623316  
Thermal correction to Gibbs Free Energy= 0.528179  
Sum of electronic and zero-point Energies= -1567.707058  
Sum of electronic and thermal Energies= -1567.675444  
Sum of electronic and thermal Enthalpies= -1567.674499  
Sum of electronic and thermal Free Energies= -1567.769637  
M06/6-311++G(d,p)-SDD/SMD//B3LYP/6-31G(d)-LANL2DZ energy in tetrahydrofuran solvent = -1568.81702

### TS(Zn)-Entry 1

| Center Number | Atomic Number | Atomic Type | Coordinates (Angstroms) |           |           |
|---------------|---------------|-------------|-------------------------|-----------|-----------|
|               |               |             | X                       | Y         | Z         |
| 1             | 6             | 0           | 0.637944                | -0.265936 | -2.262748 |
| 2             | 6             | 0           | -0.059545               | -1.170968 | -1.578447 |
| 3             | 6             | 0           | 0.901049                | 0.270572  | -0.943655 |
| 4             | 1             | 0           | 1.236075                | -0.263523 | -3.170629 |
| 5             | 1             | 0           | -0.000819               | -2.244375 | -1.793865 |
| 6             | 30            | 0           | -1.589170               | -1.103948 | 0.031184  |
| 7             | 17            | 0           | -3.592416               | -0.495976 | -0.739749 |
| 8             | 17            | 0           | -0.833625               | -2.268047 | 1.796101  |
| 9             | 6             | 0           | -0.026340               | 1.234917  | -0.281842 |
| 10            | 6             | 0           | -0.767483               | 2.138757  | -1.062047 |
| 11            | 6             | 0           | -0.164673               | 1.265236  | 1.120612  |
| 12            | 6             | 0           | -1.629639               | 3.050480  | -0.456448 |
| 13            | 1             | 0           | -0.667809               | 2.117818  | -2.142940 |
| 14            | 6             | 0           | -1.037764               | 2.174847  | 1.718747  |
| 15            | 1             | 0           | 0.396209                | 0.567189  | 1.734483  |
| 16            | 6             | 0           | -1.768546               | 3.069054  | 0.932814  |
| 17            | 1             | 0           | -2.201335               | 3.738820  | -1.071496 |
| 18            | 1             | 0           | -1.150008               | 2.176434  | 2.798749  |
| 19            | 1             | 0           | -2.450578               | 3.772360  | 1.401469  |
| 20            | 6             | 0           | 2.288246                | 0.117630  | -0.432433 |
| 21            | 6             | 0           | 2.920457                | 1.166807  | 0.263629  |
| 22            | 6             | 0           | 3.022437                | -1.052706 | -0.699778 |
| 23            | 6             | 0           | 4.247463                | 1.046970  | 0.667438  |
| 24            | 1             | 0           | 2.375150                | 2.080673  | 0.471616  |
| 25            | 6             | 0           | 4.345124                | -1.174213 | -0.279839 |
| 26            | 1             | 0           | 2.544157                | -1.883549 | -1.207884 |
| 27            | 6             | 0           | 4.962836                | -0.123587 | 0.400921  |
| 28            | 1             | 0           | 4.723262                | 1.868397  | 1.195351  |
| 29            | 1             | 0           | 4.889822                | -2.092577 | -0.478220 |
| 30            | 1             | 0           | 5.994299                | -0.218007 | 0.728315  |

-----

Zero-point correction= 0.220990 (Hartree/Particle)  
Thermal correction to Energy= 0.238572  
Thermal correction to Enthalpy= 0.239517  
Thermal correction to Gibbs Free Energy= 0.171926  
Sum of electronic and zero-point Energies= -1564.575151  
Sum of electronic and thermal Energies= -1564.557569  
Sum of electronic and thermal Enthalpies= -1564.556624  
Sum of electronic and thermal Free Energies= -1564.624215  
M06/6-311++G(d,p)-SDD/SMD//B3LYP/6-31G(d)-LANL2DZ energy in dichloromethane solvent = -1726.122768

**TS(Zn)-Entry 3**

| Center<br>Number | Atomic<br>Number | Atomic<br>Type | Coordinates (Angstroms) |           |           |
|------------------|------------------|----------------|-------------------------|-----------|-----------|
|                  |                  |                | X                       | Y         | Z         |
| 1                | 6                | 0              | 2.344921                | -1.582107 | -0.453277 |
| 2                | 6                | 0              | 1.074484                | -1.474829 | 0.023614  |
| 3                | 6                | 0              | 2.720752                | -0.517500 | 0.363467  |
| 4                | 1                | 0              | 2.934143                | -2.439168 | -0.771788 |
| 5                | 1                | 0              | 0.630985                | -2.409845 | 0.386638  |
| 6                | 30               | 0              | -0.432083               | 0.111507  | 0.006912  |
| 7                | 17               | 0              | 0.504695                | 2.151537  | -0.080369 |
| 8                | 17               | 0              | -2.460822               | -0.791189 | 0.033316  |
| 9                | 1                | 0              | 2.269360                | 0.470501  | 0.301586  |
| 10               | 1                | 0              | 3.541213                | -0.646026 | 1.073300  |

Zero-point correction= 0.058851 (Hartree/Particle)  
Thermal correction to Energy= 0.067228  
Thermal correction to Enthalpy= 0.068172  
Thermal correction to Gibbs Free Energy= 0.023039  
Sum of electronic and zero-point Energies= -1102.629335  
Sum of electronic and thermal Energies= -1102.620957  
Sum of electronic and thermal Enthalpies= -1102.620013  
Sum of electronic and thermal Free Energies= -1102.665146  
M06/6-311++G(d,p)-SDD/SMD//B3LYP/6-31G(d)-LANL2DZ energy in dichloromethane solvent = -1264.2485

**TS(Zn)-Entry 4**

| Center<br>Number | Atomic<br>Number | Atomic<br>Type | Coordinates (Angstroms) |           |           |
|------------------|------------------|----------------|-------------------------|-----------|-----------|
|                  |                  |                | X                       | Y         | Z         |
| 1                | 6                | 0              | -1.924799               | -1.628937 | -0.805627 |
| 2                | 6                | 0              | -0.824570               | -0.937524 | -1.140885 |
| 3                | 6                | 0              | -2.078295               | -0.659704 | 0.228664  |
| 4                | 1                | 0              | -2.671301               | -2.165087 | -1.387642 |
| 5                | 1                | 0              | -0.670200               | -0.741961 | -2.209702 |
| 6                | 6                | 0              | -3.202802               | 0.338578  | 0.139036  |
| 7                | 1                | 0              | -3.817599               | 0.304816  | 1.046473  |
| 8                | 1                | 0              | -2.767027               | 1.344942  | 0.076799  |
| 9                | 1                | 0              | -3.836391               | 0.178543  | -0.737631 |
| 10               | 6                | 0              | -1.355303               | -0.711746 | 1.552766  |
| 11               | 1                | 0              | -1.031605               | 0.283472  | 1.877530  |
| 12               | 1                | 0              | -2.076982               | -1.072773 | 2.299921  |
| 13               | 1                | 0              | -0.511811               | -1.407160 | 1.544482  |
| 14               | 30               | 0              | 0.831216                | 0.150201  | -0.220444 |
| 15               | 17               | 0              | 2.582976                | -1.123423 | 0.286163  |
| 16               | 17               | 0              | 0.285321                | 2.321374  | -0.035611 |

Zero-point correction= 0.114989 (Hartree/Particle)  
Thermal correction to Energy= 0.126280  
Thermal correction to Enthalpy= 0.127224  
Thermal correction to Gibbs Free Energy= 0.075372  
Sum of electronic and zero-point Energies= -1181.211661  
Sum of electronic and thermal Energies= -1181.200370  
Sum of electronic and thermal Enthalpies= -1181.199426  
Sum of electronic and thermal Free Energies= -1181.251278  
M06/6-311++G(d,p)-SDD/SMD//B3LYP/6-31G(d)-LANL2DZ energy in dichloromethane solvent = -1342.847352

**TS(Zn)-Entry 5**

| Center<br>Number | Atomic<br>Number | Atomic<br>Type | Coordinates (Angstroms) |           |           |
|------------------|------------------|----------------|-------------------------|-----------|-----------|
|                  |                  |                | X                       | Y         | Z         |
| 1                | 6                | 0              | 0.347050                | -1.881074 | -0.901271 |
| 2                | 6                | 0              | 1.347448                | -1.039565 | -1.180947 |
| 3                | 6                | 0              | 0.066523                | -0.915928 | 0.124505  |
| 4                | 1                | 0              | -0.276286               | -2.535420 | -1.501871 |
| 5                | 1                | 0              | 1.547584                | -0.802198 | -2.232856 |

|    |    |   |           |           |           |
|----|----|---|-----------|-----------|-----------|
| 6  | 30 | 0 | 2.849134  | 0.213341  | -0.194141 |
| 7  | 17 | 0 | 4.700282  | -0.894829 | 0.347407  |
| 8  | 17 | 0 | 2.115237  | 2.328663  | -0.050576 |
| 9  | 6  | 0 | 0.761568  | -0.972834 | 1.470070  |
| 10 | 1  | 0 | 1.669120  | -1.581473 | 1.434761  |
| 11 | 1  | 0 | 0.988056  | 0.026174  | 1.859857  |
| 12 | 1  | 0 | 0.078656  | -1.448845 | 2.185890  |
| 13 | 6  | 0 | -1.101194 | 0.062466  | -0.004749 |
| 14 | 1  | 0 | -0.579366 | 1.026607  | -0.132492 |
| 15 | 6  | 0 | -1.993252 | 0.209433  | 1.266161  |
| 16 | 6  | 0 | -2.027987 | -0.150521 | -1.231453 |
| 17 | 1  | 0 | -1.363447 | 0.348508  | 2.150855  |
| 18 | 6  | 0 | -2.896151 | -1.029222 | 1.449238  |
| 19 | 6  | 0 | -2.876910 | 1.464871  | 1.090697  |
| 20 | 1  | 0 | -1.420263 | -0.279373 | -2.136641 |
| 21 | 6  | 0 | -2.943335 | -1.380968 | -1.034046 |
| 22 | 6  | 0 | -2.912219 | 1.106090  | -1.397787 |
| 23 | 1  | 0 | -3.496439 | -0.911434 | 2.361102  |
| 24 | 1  | 0 | -2.291396 | -1.937482 | 1.587105  |
| 25 | 6  | 0 | -3.817048 | -1.192339 | 0.222060  |
| 26 | 1  | 0 | -2.244393 | 2.356036  | 0.986411  |
| 27 | 1  | 0 | -3.485896 | 1.608427  | 1.993336  |
| 28 | 6  | 0 | -3.787253 | 1.302569  | -0.142513 |
| 29 | 1  | 0 | -2.357517 | -2.304707 | -0.935403 |
| 30 | 1  | 0 | -3.576954 | -1.507787 | -1.922006 |
| 31 | 1  | 0 | -2.281674 | 1.989271  | -1.564753 |
| 32 | 1  | 0 | -3.546372 | 0.992900  | -2.287246 |
| 33 | 1  | 0 | -4.458110 | -2.072739 | 0.358297  |
| 34 | 6  | 0 | -4.691489 | 0.068021  | 0.054480  |
| 35 | 1  | 0 | -4.406187 | 2.200541  | -0.263837 |
| 36 | 1  | 0 | -5.361934 | -0.052903 | -0.807337 |
| 37 | 1  | 0 | -5.329507 | 0.204513  | 0.938265  |

-----  
Zero-point correction= 0.312276 (Hartree/Particle)  
Thermal correction to Energy= 0.329153  
Thermal correction to Enthalpy= 0.330097  
Thermal correction to Gibbs Free Energy= 0.265188  
Sum of electronic and zero-point Energies= -1531.212764  
Sum of electronic and thermal Energies= -1531.195887  
Sum of electronic and thermal Enthalpies= -1531.194943  
Sum of electronic and thermal Free Energies= -1531.259852  
M06/6-311++G(d,p)-SDD/SMD//B3LYP/6-31G(d)-LANL2DZ energy in dichloromethane solvent = -1692.878863

#### TS(Zn)-Entry 6

-----

| Center<br>Number | Atomic<br>Number | Atomic<br>Type | Coordinates (Angstroms) |           |           |
|------------------|------------------|----------------|-------------------------|-----------|-----------|
|                  |                  |                | X                       | Y         | Z         |
| 1                | 6                | 0              | 0.440130                | 1.944339  | -0.074632 |
| 2                | 6                | 0              | 1.472242                | 1.316957  | 0.521450  |
| 3                | 6                | 0              | 0.001485                | 0.671601  | -0.593040 |
| 4                | 30               | 0              | 2.719609                | -0.400823 | 0.067208  |
| 5                | 17               | 0              | 4.651826                | 0.083590  | -0.944601 |
| 6                | 17               | 0              | 1.852952                | -2.305394 | 0.920734  |
| 7                | 6                | 0              | 0.658923                | 0.095219  | -1.828881 |
| 8                | 1                | 0              | 1.582149                | 0.620916  | -2.084985 |
| 9                | 1                | 0              | 0.835642                | -0.984551 | -1.759264 |
| 10               | 1                | 0              | -0.038087               | 0.241663  | -2.667047 |
| 11               | 6                | 0              | -1.170476               | -0.128538 | -0.029157 |
| 12               | 1                | 0              | -0.622478               | -0.886228 | 0.560071  |
| 13               | 6                | 0              | -2.017433               | -0.941498 | -1.058927 |
| 14               | 6                | 0              | -2.143340               | 0.599263  | 0.935978  |
| 15               | 1                | 0              | -1.359810               | -1.455291 | -1.766017 |
| 16               | 6                | 0              | -2.997359               | -0.024539 | -1.820586 |
| 17               | 6                | 0              | -2.818611               | -2.008532 | -0.278582 |
| 18               | 1                | 0              | -1.571427               | 1.196307  | 1.657044  |
| 19               | 6                | 0              | -3.133297               | 1.499945  | 0.160212  |

|    |   |   |           |           |           |
|----|---|---|-----------|-----------|-----------|
| 20 | 6 | 0 | -2.947965 | -0.471642 | 1.709154  |
| 21 | 1 | 0 | -3.560778 | -0.620361 | -2.550905 |
| 22 | 1 | 0 | -2.452687 | 0.741094  | -2.392628 |
| 23 | 6 | 0 | -3.961394 | 0.651989  | -0.824773 |
| 24 | 1 | 0 | -2.129197 | -2.684941 | 0.242765  |
| 25 | 1 | 0 | -3.392994 | -2.620173 | -0.987271 |
| 26 | 6 | 0 | -3.770689 | -1.327117 | 0.723713  |
| 27 | 1 | 0 | -2.604794 | 2.283725  | -0.394781 |
| 28 | 1 | 0 | -3.795798 | 2.010233  | 0.872645  |
| 29 | 1 | 0 | -2.266075 | -1.108161 | 2.288230  |
| 30 | 1 | 0 | -3.615101 | 0.021446  | 2.429013  |
| 31 | 1 | 0 | -4.657095 | 1.302285  | -1.370670 |
| 32 | 6 | 0 | -4.752081 | -0.420949 | -0.047911 |
| 33 | 1 | 0 | -4.328937 | -2.091065 | 1.279557  |
| 34 | 1 | 0 | -5.452231 | 0.060781  | 0.648365  |
| 35 | 1 | 0 | -5.355266 | -1.021948 | -0.741989 |
| 36 | 6 | 0 | 1.938018  | 1.701928  | 1.920350  |
| 37 | 1 | 0 | 1.710660  | 0.886913  | 2.619673  |
| 38 | 1 | 0 | 3.026814  | 1.836778  | 1.935315  |
| 39 | 1 | 0 | 1.467489  | 2.617803  | 2.297247  |
| 40 | 6 | 0 | -0.210888 | 3.270661  | 0.178214  |
| 41 | 1 | 0 | -0.679249 | 3.655699  | -0.733373 |
| 42 | 1 | 0 | -0.983103 | 3.228784  | 0.953672  |
| 43 | 1 | 0 | 0.549255  | 3.989116  | 0.499328  |

-----

Zero-point correction= 0.369150 (Hartree/Particle)  
Thermal correction to Energy= 0.389257  
Thermal correction to Enthalpy= 0.390201  
Thermal correction to Gibbs Free Energy= 0.318976  
Sum of electronic and zero-point Energies= -1609.792335  
Sum of electronic and thermal Energies= -1609.772228  
Sum of electronic and thermal Enthalpies= -1609.771284  
Sum of electronic and thermal Free Energies= -1609.842509  
M06/6-311++G(d,p)-SDD/SMD//B3LYP/6-31G(d)-LANL2DZ energy in dichloromethane solvent = -1771.471433
